# Supplementary material
Source: MDPI journal article supplement (https://www.mdpi.com/2071-1050/9/9/1673)
Supplement: s1 [file s1]

obs	XSC	UNS1	UNS2	IEE1	IEE2	ITI1	ITI2	TSM1	TSM2	STAY1	STAY2	STAY3	Tickets	CHOICE	TI	COUNTRY	SEX	EDU	INCOME	OCS	ECG	TNV	PIT	TSN
1	0	-1	-1	0	1	-1	-1	-1	-1	0	0	1	3600	0	3	0	0	1	1	1	1	1	1	1
1	0	-1	-1	1	0	-1	-1	-1	-1	0	1	0	2400	1	3	0	0	1	1	1	1	1	1	1
1	1	-1	-1	-1	-1	-1	-1	-1	-1	-1	-1	-1	600	0	3	0	0	1	1	1	1	1	1	1
1	0	-1	-1	-1	-1	1	0	1	0	1	0	0	3600	0	3	0	0	1	1	1	1	1	1	1
1	0	0	1	-1	-1	1	0	-1	-1	1	0	0	1800	1	3	0	0	1	1	1	1	1	1	1
1	1	-1	-1	-1	-1	-1	-1	-1	-1	-1	-1	-1	600	0	3	0	0	1	1	1	1	1	1	1
1	0	1	0	-1	-1	0	1	1	0	0	1	0	3600	0	3	0	0	1	1	1	1	1	1	1
1	0	-1	-1	-1	-1	-1	-1	1	0	-1	-1	-1	1800	1	3	0	0	1	1	1	1	1	1	1
1	1	-1	-1	-1	-1	-1	-1	-1	-1	-1	-1	-1	600	0	3	0	0	1	1	1	1	1	1	1
2	0	-1	-1	0	1	-1	-1	-1	-1	0	0	1	3600	0	3	0	0	1	1	1	1	1	1	1
2	0	0	1	0	1	0	1	1	0	-1	-1	-1	2400	1	3	0	0	1	1	1	1	1	1	1
2	1	-1	-1	-1	-1	-1	-1	-1	-1	-1	-1	-1	600	0	3	0	0	1	1	1	1	1	1	1
2	0	-1	-1	-1	-1	1	0	1	0	1	0	0	3600	0	3	0	0	1	1	1	1	1	1	1
2	0	-1	-1	1	0	0	1	0	1	0	0	1	1800	1	3	0	0	1	1	1	1	1	1	1
2	1	-1	-1	-1	-1	-1	-1	-1	-1	-1	-1	-1	600	0	3	0	0	1	1	1	1	1	1	1
2	0	1	0	0	1	-1	-1	0	1	1	0	0	600	1	3	0	0	1	1	1	1	1	1	1
2	0	0	1	-1	-1	1	0	-1	-1	1	0	0	1800	0	3	0	0	1	1	1	1	1	1	1
2	1	-1	-1	-1	-1	-1	-1	-1	-1	-1	-1	-1	600	0	3	0	0	1	1	1	1	1	1	1
3	0	-1	-1	0	1	-1	-1	-1	-1	0	0	1	3600	1	3	0	1	1	1	1	1	0	1	1
3	0	-1	-1	1	0	0	1	-1	-1	1	0	0	1200	0	3	0	1	1	1	1	1	0	1	1
3	1	-1	-1	-1	-1	-1	-1	-1	-1	-1	-1	-1	600	0	3	0	1	1	1	1	1	0	1	1
3	0	-1	-1	-1	-1	1	0	1	0	1	0	0	3600	0	3	0	1	1	1	1	1	0	1	1
3	0	1	0	1	0	-1	-1	1	0	1	0	0	2400	1	3	0	1	1	1	1	1	0	1	1
3	1	-1	-1	-1	-1	-1	-1	-1	-1	-1	-1	-1	600	0	3	0	1	1	1	1	1	0	1	1
3	0	1	0	0	1	-1	-1	0	1	1	0	0	600	0	3	0	1	1	1	1	1	0	1	1
3	0	-1	-1	1	0	0	1	0	1	0	0	1	1800	1	3	0	1	1	1	1	1	0	1	1
3	1	-1	-1	-1	-1	-1	-1	-1	-1	-1	-1	-1	600	0	3	0	1	1	1	1	1	0	1	1
4	0	-1	-1	0	1	-1	-1	-1	-1	0	0	1	3600	1	3	0	1	1	0	1	0	0	1	1
4	0	-1	-1	-1	-1	1	0	1	0	1	0	0	3600	0	3	0	1	1	0	1	0	0	1	1
4	1	-1	-1	-1	-1	-1	-1	-1	-1	-1	-1	-1	600	0	3	0	1	1	0	1	0	0	1	1
4	0	-1	-1	-1	-1	1	0	1	0	1	0	0	3600	0	3	0	1	1	0	1	0	0	1	1
4	0	0	1	-1	-1	-1	-1	0	1	0	1	0	1200	1	3	0	1	1	0	1	0	0	1	1
4	1	-1	-1	-1	-1	-1	-1	-1	-1	-1	-1	-1	600	0	3	0	1	1	0	1	0	0	1	1
4	0	1	0	0	1	-1	-1	0	1	1	0	0	600	1	3	0	1	1	0	1	0	0	1	1
4	0	1	0	1	0	-1	-1	1	0	1	0	0	2400	0	3	0	1	1	0	1	0	0	1	1
4	1	-1	-1	-1	-1	-1	-1	-1	-1	-1	-1	-1	600	0	3	0	1	1	0	1	0	0	1	1
5	0	-1	-1	0	1	-1	-1	-1	-1	0	0	1	3600	0	3	0	1	1	1	1	1	1	1	1
5	0	1	0	1	0	1	0	-1	-1	-1	-1	-1	1200	1	3	0	1	1	1	1	1	1	1	1
5	1	-1	-1	-1	-1	-1	-1	-1	-1	-1	-1	-1	600	0	3	0	1	1	1	1	1	1	1	1
5	0	-1	-1	-1	-1	1	0	1	0	1	0	0	3600	0	3	0	1	1	1	1	1	1	1	1
5	0	0	1	1	0	-1	-1	-1	-1	-1	-1	-1	3600	0	3	0	1	1	1	1	1	1	1	1
5	1	-1	-1	-1	-1	-1	-1	-1	-1	-1	-1	-1	600	1	3	0	1	1	1	1	1	1	1	1
5	0	1	0	0	1	-1	-1	0	1	1	0	0	600	0	3	0	1	1	1	1	1	1	1	1
5	0	0	1	-1	-1	-1	-1	0	1	0	1	0	1200	1	3	0	1	1	1	1	1	1	1	1
5	1	-1	-1	-1	-1	-1	-1	-1	-1	-1	-1	-1	600	0	3	0	1	1	1	1	1	1	1	1
6	0	-1	-1	0	1	-1	-1	-1	-1	0	0	1	3600	0	3	0	1	1	1	1	1	1	1	1
6	0	-1	-1	-1	-1	1	0	0	1	-1	-1	-1	2400	1	3	0	1	1	1	1	1	1	1	1
6	1	-1	-1	-1	-1	-1	-1	-1	-1	-1	-1	-1	600	0	3	0	1	1	1	1	1	1	1	1
6	0	-1	-1	-1	-1	1	0	1	0	1	0	0	3600	0	3	0	1	1	1	1	1	1	1	1
6	0	1	0	1	0	1	0	0	1	-1	-1	-1	3600	1	3	0	1	1	1	1	1	1	1	1
6	1	-1	-1	-1	-1	-1	-1	-1	-1	-1	-1	-1	600	0	3	0	1	1	1	1	1	1	1	1
6	0	1	0	0	1	-1	-1	0	1	1	0	0	600	0	3	0	1	1	1	1	1	1	1	1
6	0	0	1	1	0	-1	-1	-1	-1	-1	-1	-1	3600	1	3	0	1	1	1	1	1	1	1	1
6	1	-1	-1	-1	-1	-1	-1	-1	-1	-1	-1	-1	600	0	3	0	1	1	1	1	1	1	1	1
7	0	-1	-1	0	1	-1	-1	-1	-1	0	0	1	3600	1	3	0	0	1	1	1	1	1	1	1
7	0	1	0	0	1	1	0	-1	-1	0	1	0	1800	0	3	0	0	1	1	1	1	1	1	1
7	1	-1	-1	-1	-1	-1	-1	-1	-1	-1	-1	-1	600	0	3	0	0	1	1	1	1	1	1	1
7	0	-1	-1	-1	-1	1	0	1	0	1	0	0	3600	0	3	0	0	1	1	1	1	1	1	1
7	0	1	0	1	0	-1	-1	1	0	-1	-1	-1	1800	1	3	0	0	1	1	1	1	1	1	1
7	1	-1	-1	-1	-1	-1	-1	-1	-1	-1	-1	-1	600	0	3	0	0	1	1	1	1	1	1	1
7	0	1	0	0	1	-1	-1	0	1	1	0	0	600	1	3	0	0	1	1	1	1	1	1	1
7	0	1	0	1	0	1	0	0	1	-1	-1	-1	3600	0	3	0	0	1	1	1	1	1	1	1
7	1	-1	-1	-1	-1	-1	-1	-1	-1	-1	-1	-1	600	0	3	0	0	1	1	1	1	1	1	1
8	0	-1	-1	0	1	-1	-1	-1	-1	0	0	1	3600	1	3	0	0	0	0	1	0	0	1	1
8	0	1	0	-1	-1	1	0	-1	-1	0	0	1	2400	0	3	0	0	0	0	1	0	0	1	1
8	1	-1	-1	-1	-1	-1	-1	-1	-1	-1	-1	-1	600	0	3	0	0	0	0	1	0	0	1	1
8	0	-1	-1	-1	-1	1	0	1	0	1	0	0	3600	0	3	0	0	0	0	1	0	0	1	1
8	0	-1	-1	0	1	1	0	1	0	-1	-1	-1	1200	1	3	0	0	0	0	1	0	0	1	1
8	1	-1	-1	-1	-1	-1	-1	-1	-1	-1	-1	-1	600	0	3	0	0	0	0	1	0	0	1	1
8	0	1	0	0	1	-1	-1	0	1	1	0	0	600	1	3	0	0	0	0	1	0	0	1	1
8	0	1	0	1	0	-1	-1	1	0	-1	-1	-1	1800	0	3	0	0	0	0	1	0	0	1	1
8	1	-1	-1	-1	-1	-1	-1	-1	-1	-1	-1	-1	600	0	3	0	0	0	0	1	0	0	1	1
9	0	-1	-1	0	1	-1	-1	-1	-1	0	0	1	3600	0	3	0	1	1	1	1	1	0	1	1
9	0	1	0	-1	-1	0	1	1	0	0	1	0	3600	1	3	0	1	1	1	1	1	0	1	1
9	1	-1	-1	-1	-1	-1	-1	-1	-1	-1	-1	-1	600	0	3	0	1	1	1	1	1	0	1	1
9	0	-1	-1	-1	-1	1	0	1	0	1	0	0	3600	0	3	0	1	1	1	1	1	0	1	1
9	0	0	1	1	0	1	0	1	0	0	0	1	600	1	3	0	1	1	1	1	1	0	1	1
9	1	-1	-1	-1	-1	-1	-1	-1	-1	-1	-1	-1	600	0	3	0	1	1	1	1	1	0	1	1
9	0	1	0	0	1	-1	-1	0	1	1	0	0	600	1	3	0	1	1	1	1	1	0	1	1
9	0	-1	-1	0	1	1	0	1	0	-1	-1	-1	1200	0	3	0	1	1	1	1	1	0	1	1
9	1	-1	-1	-1	-1	-1	-1	-1	-1	-1	-1	-1	600	0	3	0	1	1	1	1	1	0	1	1
10	0	-1	-1	0	1	-1	-1	-1	-1	0	0	1	3600	0	3	1	0	1	0	1	1	1	1	1
10	0	1	0	0	1	-1	-1	0	1	1	0	0	600	0	3	1	0	1	0	1	1	1	1	1
10	1	-1	-1	-1	-1	-1	-1	-1	-1	-1	-1	-1	600	1	3	1	0	1	0	1	1	1	1	1
10	0	-1	-1	-1	-1	1	0	1	0	1	0	0	3600	0	3	1	0	1	0	1	1	1	1	1
10	0	1	0	-1	-1	-1	-1	1	0	0	0	1	1200	1	3	1	0	1	0	1	1	1	1	1
10	1	-1	-1	-1	-1	-1	-1	-1	-1	-1	-1	-1	600	0	3	1	0	1	0	1	1	1	1	1
10	0	1	0	0	1	-1	-1	0	1	1	0	0	600	1	3	1	0	1	0	1	1	1	1	1
10	0	0	1	1	0	1	0	1	0	0	0	1	600	0	3	1	0	1	0	1	1	1	1	1
10	1	-1	-1	-1	-1	-1	-1	-1	-1	-1	-1	-1	600	0	3	1	0	1	0	1	1	1	1	1
11	0	-1	-1	0	1	-1	-1	-1	-1	0	0	1	3600	1	3	0	1	1	0	1	1	0	1	1
11	0	0	1	-1	-1	1	0	-1	-1	1	0	0	1800	0	3	0	1	1	0	1	1	0	1	1
11	1	-1	-1	-1	-1	-1	-1	-1	-1	-1	-1	-1	600	0	3	0	1	1	0	1	1	0	1	1
11	0	-1	-1	-1	-1	1	0	1	0	1	0	0	3600	0	3	0	1	1	0	1	1	0	1	1
11	0	-1	-1	1	0	1	0	1	0	0	1	0	600	1	3	0	1	1	0	1	1	0	1	1
11	1	-1	-1	-1	-1	-1	-1	-1	-1	-1	-1	-1	600	0	3	0	1	1	0	1	1	0	1	1
11	0	1	0	0	1	-1	-1	0	1	1	0	0	600	1	3	0	1	1	0	1	1	0	1	1
11	0	1	0	-1	-1	-1	-1	1	0	0	0	1	1200	0	3	0	1	1	0	1	1	0	1	1
11	1	-1	-1	-1	-1	-1	-1	-1	-1	-1	-1	-1	600	0	3	0	1	1	0	1	1	0	1	1
12	0	-1	-1	0	1	-1	-1	-1	-1	0	0	1	3600	0	3	1	0	1	0	1	0	0	1	1
12	0	-1	-1	1	0	0	1	0	1	0	0	1	1800	1	3	1	0	1	0	1	0	0	1	1
12	1	-1	-1	-1	-1	-1	-1	-1	-1	-1	-1	-1	600	0	3	1	0	1	0	1	0	0	1	1
12	0	-1	-1	-1	-1	1	0	1	0	1	0	0	3600	0	3	1	0	1	0	1	0	0	1	1
12	0	1	0	-1	-1	0	1	-1	-1	-1	-1	-1	600	1	3	1	0	1	0	1	0	0	1	1
12	1	-1	-1	-1	-1	-1	-1	-1	-1	-1	-1	-1	600	0	3	1	0	1	0	1	0	0	1	1
12	0	1	0	0	1	-1	-1	0	1	1	0	0	600	0	3	1	0	1	0	1	0	0	1	1
12	0	-1	-1	1	0	1	0	1	0	0	1	0	600	1	3	1	0	1	0	1	0	0	1	1
12	1	-1	-1	-1	-1	-1	-1	-1	-1	-1	-1	-1	600	0	3	1	0	1	0	1	0	0	1	1
13	0	-1	-1	0	1	-1	-1	-1	-1	0	0	1	3600	0	3	1	0	0	1	1	1	1	1	1
13	0	1	0	1	0	-1	-1	1	0	1	0	0	2400	0	3	1	0	0	1	1	1	1	1	1
13	1	-1	-1	-1	-1	-1	-1	-1	-1	-1	-1	-1	600	1	3	1	0	0	1	1	1	1	1	1
13	0	-1	-1	-1	-1	1	0	1	0	1	0	0	3600	0	3	1	0	0	1	1	1	1	1	1
13	0	-1	-1	-1	-1	-1	-1	1	0	-1	-1	-1	1800	1	3	1	0	0	1	1	1	1	1	1
13	1	-1	-1	-1	-1	-1	-1	-1	-1	-1	-1	-1	600	0	3	1	0	0	1	1	1	1	1	1
13	0	1	0	0	1	-1	-1	0	1	1	0	0	600	1	3	1	0	0	1	1	1	1	1	1
13	0	1	0	-1	-1	0	1	-1	-1	-1	-1	-1	600	0	3	1	0	0	1	1	1	1	1	1
13	1	-1	-1	-1	-1	-1	-1	-1	-1	-1	-1	-1	600	0	3	1	0	0	1	1	1	1	1	1
14	0	-1	-1	0	1	-1	-1	-1	-1	0	0	1	3600	0	3	1	0	1	0	1	1	0	1	1
14	0	0	1	-1	-1	-1	-1	0	1	0	1	0	1200	1	3	1	0	1	0	1	1	0	1	1
14	1	-1	-1	-1	-1	-1	-1	-1	-1	-1	-1	-1	600	0	3	1	0	1	0	1	1	0	1	1
14	0	1	0	1	0	1	0	-1	-1	-1	-1	-1	1200	0	3	1	0	1	0	1	1	0	1	1
14	0	-1	-1	-1	-1	1	0	0	1	-1	-1	-1	2400	1	3	1	0	1	0	1	1	0	1	1
14	1	-1	-1	-1	-1	-1	-1	-1	-1	-1	-1	-1	600	0	3	1	0	1	0	1	1	0	1	1
14	0	1	0	0	1	-1	-1	0	1	1	0	0	600	0	3	1	0	1	0	1	1	0	1	1
14	0	-1	-1	-1	-1	-1	-1	1	0	-1	-1	-1	1800	1	3	1	0	1	0	1	1	0	1	1
14	1	-1	-1	-1	-1	-1	-1	-1	-1	-1	-1	-1	600	0	3	1	0	1	0	1	1	0	1	1
15	0	-1	-1	0	1	-1	-1	-1	-1	0	0	1	3600	1	3	1	0	1	0	1	1	1	1	1
15	0	0	1	1	0	-1	-1	-1	-1	-1	-1	-1	3600	0	3	1	0	1	0	1	1	1	1	1
15	1	-1	-1	-1	-1	-1	-1	-1	-1	-1	-1	-1	600	0	3	1	0	1	0	1	1	1	1	1
15	0	1	0	1	0	1	0	-1	-1	-1	-1	-1	1200	0	3	1	0	1	0	1	1	1	1	1
15	0	1	0	0	1	1	0	-1	-1	0	1	0	1800	1	3	1	0	1	0	1	1	1	1	1
15	1	-1	-1	-1	-1	-1	-1	-1	-1	-1	-1	-1	600	0	3	1	0	1	0	1	1	1	1	1
15	0	0	1	-1	-1	1	0	-1	-1	1	0	0	1800	0	3	1	0	1	0	1	1	1	1	1
15	0	-1	-1	1	0	0	1	0	1	0	0	1	1800	1	3	1	0	1	0	1	1	1	1	1
15	1	-1	-1	-1	-1	-1	-1	-1	-1	-1	-1	-1	600	0	3	1	0	1	0	1	1	1	1	1
16	0	-1	-1	0	1	-1	-1	-1	-1	0	0	1	3600	0	3	0	0	1	0	1	1	1	1	1
16	0	1	0	1	0	1	0	0	1	-1	-1	-1	3600	0	3	0	0	1	0	1	1	1	1	1
16	1	-1	-1	-1	-1	-1	-1	-1	-1	-1	-1	-1	600	1	3	0	0	1	0	1	1	1	1	1
16	0	1	0	1	0	1	0	-1	-1	-1	-1	-1	1200	0	3	0	0	1	0	1	1	1	1	1
16	0	1	0	-1	-1	1	0	-1	-1	0	0	1	2400	0	3	0	0	1	0	1	1	1	1	1
16	1	-1	-1	-1	-1	-1	-1	-1	-1	-1	-1	-1	600	1	3	0	0	1	0	1	1	1	1	1
16	0	0	1	-1	-1	1	0	-1	-1	1	0	0	1800	0	3	0	0	1	0	1	1	1	1	1
16	0	1	0	1	0	-1	-1	1	0	1	0	0	2400	0	3	0	0	1	0	1	1	1	1	1
16	1	-1	-1	-1	-1	-1	-1	-1	-1	-1	-1	-1	600	1	3	0	0	1	0	1	1	1	1	1
17	0	-1	-1	0	1	-1	-1	-1	-1	0	0	1	3600	1	3	0	1	1	1	1	1	0	1	1
17	0	1	0	1	0	-1	-1	1	0	-1	-1	-1	1800	0	3	0	1	1	1	1	1	0	1	1
17	1	-1	-1	-1	-1	-1	-1	-1	-1	-1	-1	-1	600	0	3	0	1	1	1	1	1	0	1	1
17	0	1	0	1	0	1	0	-1	-1	-1	-1	-1	1200	1	3	0	1	1	1	1	1	0	1	1
17	0	1	0	-1	-1	0	1	1	0	0	1	0	3600	0	3	0	1	1	1	1	1	0	1	1
17	1	-1	-1	-1	-1	-1	-1	-1	-1	-1	-1	-1	600	0	3	0	1	1	1	1	1	0	1	1
17	0	0	1	-1	-1	1	0	-1	-1	1	0	0	1800	0	3	0	1	1	1	1	1	0	1	1
17	0	0	1	-1	-1	-1	-1	0	1	0	1	0	1200	0	3	0	1	1	1	1	1	0	1	1
17	1	-1	-1	-1	-1	-1	-1	-1	-1	-1	-1	-1	600	1	3	0	1	1	1	1	1	0	1	1
18	0	-1	-1	0	1	-1	-1	-1	-1	0	0	1	3600	0	3	0	0	0	0	1	0	1	1	1
18	0	-1	-1	0	1	1	0	1	0	-1	-1	-1	1200	1	3	0	0	0	0	1	0	1	1	1
18	1	-1	-1	-1	-1	-1	-1	-1	-1	-1	-1	-1	600	0	3	0	0	0	0	1	0	1	1	1
18	0	1	0	1	0	1	0	-1	-1	-1	-1	-1	1200	0	3	0	0	0	0	1	0	1	1	1
18	0	1	0	0	1	-1	-1	0	1	1	0	0	600	1	3	0	0	0	0	1	0	1	1	1
18	1	-1	-1	-1	-1	-1	-1	-1	-1	-1	-1	-1	600	0	3	0	0	0	0	1	0	1	1	1
18	0	0	1	-1	-1	1	0	-1	-1	1	0	0	1800	0	3	0	0	0	0	1	0	1	1	1
18	0	0	1	1	0	-1	-1	-1	-1	-1	-1	-1	3600	0	3	0	0	0	0	1	0	1	1	1
18	1	-1	-1	-1	-1	-1	-1	-1	-1	-1	-1	-1	600	1	3	0	0	0	0	1	0	1	1	1
19	0	-1	-1	0	1	-1	-1	-1	-1	0	0	1	3600	1	3	1	1	1	0	1	1	1	1	1
19	0	0	1	1	0	1	0	1	0	0	0	1	600	0	3	1	1	1	0	1	1	1	1	1
19	1	-1	-1	-1	-1	-1	-1	-1	-1	-1	-1	-1	600	0	3	1	1	1	0	1	1	1	1	1
19	0	1	0	1	0	1	0	-1	-1	-1	-1	-1	1200	0	3	1	1	1	0	1	1	1	1	1
19	0	0	1	-1	-1	1	0	-1	-1	1	0	0	1800	1	3	1	1	1	0	1	1	1	1	1
19	1	-1	-1	-1	-1	-1	-1	-1	-1	-1	-1	-1	600	0	3	1	1	1	0	1	1	1	1	1
19	0	0	1	-1	-1	1	0	-1	-1	1	0	0	1800	0	3	1	1	1	0	1	1	1	1	1
19	0	1	0	1	0	1	0	0	1	-1	-1	-1	3600	1	3	1	1	1	0	1	1	1	1	1
19	1	-1	-1	-1	-1	-1	-1	-1	-1	-1	-1	-1	600	0	3	1	1	1	0	1	1	1	1	1
20	0	-1	-1	0	1	-1	-1	-1	-1	0	0	1	3600	0	3	1	1	1	0	1	1	0	1	1
20	0	1	0	-1	-1	-1	-1	1	0	0	0	1	1200	1	3	1	1	1	0	1	1	0	1	1
20	1	-1	-1	-1	-1	-1	-1	-1	-1	-1	-1	-1	600	0	3	1	1	1	0	1	1	0	1	1
20	0	1	0	1	0	1	0	-1	-1	-1	-1	-1	1200	0	3	1	1	1	0	1	1	0	1	1
20	0	-1	-1	1	0	0	1	0	1	0	0	1	1800	1	3	1	1	1	0	1	1	0	1	1
20	1	-1	-1	-1	-1	-1	-1	-1	-1	-1	-1	-1	600	0	3	1	1	1	0	1	1	0	1	1
20	0	0	1	-1	-1	1	0	-1	-1	1	0	0	1800	0	3	1	1	1	0	1	1	0	1	1
20	0	1	0	1	0	-1	-1	1	0	-1	-1	-1	1800	1	3	1	1	1	0	1	1	0	1	1
20	1	-1	-1	-1	-1	-1	-1	-1	-1	-1	-1	-1	600	0	3	1	1	1	0	1	1	0	1	1
21	0	-1	-1	0	1	-1	-1	-1	-1	0	0	1	3600	0	3	0	0	1	0	1	1	0	1	1
21	0	-1	-1	1	0	1	0	1	0	0	1	0	600	1	3	0	0	1	0	1	1	0	1	1
21	1	-1	-1	-1	-1	-1	-1	-1	-1	-1	-1	-1	600	0	3	0	0	1	0	1	1	0	1	1
21	0	1	0	1	0	1	0	-1	-1	-1	-1	-1	1200	1	3	0	0	1	0	1	1	0	1	1
21	0	1	0	1	0	-1	-1	1	0	1	0	0	2400	0	3	0	0	1	0	1	1	0	1	1
21	1	-1	-1	-1	-1	-1	-1	-1	-1	-1	-1	-1	600	0	3	0	0	1	0	1	1	0	1	1
21	0	0	1	-1	-1	1	0	-1	-1	1	0	0	1800	0	3	0	0	1	0	1	1	0	1	1
21	0	-1	-1	0	1	1	0	1	0	-1	-1	-1	1200	1	3	0	0	1	0	1	1	0	1	1
21	1	-1	-1	-1	-1	-1	-1	-1	-1	-1	-1	-1	600	0	3	0	0	1	0	1	1	0	1	1
22	0	-1	-1	0	1	-1	-1	-1	-1	0	0	1	3600	0	3	1	0	1	1	1	1	0	1	1
22	0	1	0	-1	-1	0	1	-1	-1	-1	-1	-1	600	0	3	1	0	1	1	1	1	0	1	1
22	1	-1	-1	-1	-1	-1	-1	-1	-1	-1	-1	-1	600	1	3	1	0	1	1	1	1	0	1	1
22	0	1	0	1	0	1	0	-1	-1	-1	-1	-1	1200	0	3	1	0	1	1	1	1	0	1	1
22	0	0	1	-1	-1	-1	-1	0	1	0	1	0	1200	0	3	1	0	1	1	1	1	0	1	1
22	1	-1	-1	-1	-1	-1	-1	-1	-1	-1	-1	-1	600	1	3	1	0	1	1	1	1	0	1	1
22	0	0	1	-1	-1	1	0	-1	-1	1	0	0	1800	0	3	1	0	1	1	1	1	0	1	1
22	0	0	1	1	0	1	0	1	0	0	0	1	600	0	3	1	0	1	1	1	1	0	1	1
22	1	-1	-1	-1	-1	-1	-1	-1	-1	-1	-1	-1	600	1	3	1	0	1	1	1	1	0	1	1
23	0	-1	-1	0	1	-1	-1	-1	-1	0	0	1	3600	0	3	1	1	1	0	1	1	0	1	1
23	0	-1	-1	-1	-1	-1	-1	1	0	-1	-1	-1	1800	1	3	1	1	1	0	1	1	0	1	1
23	1	-1	-1	-1	-1	-1	-1	-1	-1	-1	-1	-1	600	0	3	1	1	1	0	1	1	0	1	1
23	0	1	0	1	0	1	0	-1	-1	-1	-1	-1	1200	1	3	1	1	1	0	1	1	0	1	1
23	0	0	1	1	0	-1	-1	-1	-1	-1	-1	-1	3600	0	3	1	1	1	0	1	1	0	1	1
23	1	-1	-1	-1	-1	-1	-1	-1	-1	-1	-1	-1	600	0	3	1	1	1	0	1	1	0	1	1
23	0	0	1	-1	-1	1	0	-1	-1	1	0	0	1800	0	3	1	1	1	0	1	1	0	1	1
23	0	1	0	-1	-1	-1	-1	1	0	0	0	1	1200	1	3	1	1	1	0	1	1	0	1	1
23	1	-1	-1	-1	-1	-1	-1	-1	-1	-1	-1	-1	600	0	3	1	1	1	0	1	1	0	1	1
24	0	-1	-1	1	0	-1	-1	-1	-1	0	1	0	2400	0	3	1	0	0	0	1	1	0	1	1
24	0	0	1	0	1	0	1	1	0	-1	-1	-1	2400	1	3	1	0	0	0	1	1	0	1	1
24	1	-1	-1	-1	-1	-1	-1	-1	-1	-1	-1	-1	600	0	3	1	0	0	0	1	1	0	1	1
24	0	1	0	1	0	1	0	-1	-1	-1	-1	-1	1200	0	3	1	0	0	0	1	1	0	1	1
24	0	1	0	1	0	1	0	0	1	-1	-1	-1	3600	1	3	1	0	0	0	1	1	0	1	1
24	1	-1	-1	-1	-1	-1	-1	-1	-1	-1	-1	-1	600	0	3	1	0	0	0	1	1	0	1	1
24	0	0	1	-1	-1	1	0	-1	-1	1	0	0	1800	0	3	1	0	0	0	1	1	0	1	1
24	0	-1	-1	1	0	1	0	1	0	0	1	0	600	1	3	1	0	0	0	1	1	0	1	1
24	1	-1	-1	-1	-1	-1	-1	-1	-1	-1	-1	-1	600	0	3	1	0	0	0	1	1	0	1	1
25	0	-1	-1	1	0	-1	-1	-1	-1	0	1	0	2400	0	3	0	0	0	0	1	0	0	1	1
25	0	-1	-1	1	0	0	1	-1	-1	1	0	0	1200	1	3	0	0	0	0	1	0	0	1	1
25	1	-1	-1	-1	-1	-1	-1	-1	-1	-1	-1	-1	600	0	3	0	0	0	0	1	0	0	1	1
25	0	1	0	1	0	1	0	-1	-1	-1	-1	-1	1200	1	3	0	0	0	0	1	0	0	1	1
25	0	1	0	1	0	-1	-1	1	0	-1	-1	-1	1800	0	3	0	0	0	0	1	0	0	1	1
25	1	-1	-1	-1	-1	-1	-1	-1	-1	-1	-1	-1	600	0	3	0	0	0	0	1	0	0	1	1
25	0	0	1	-1	-1	1	0	-1	-1	1	0	0	1800	1	3	0	0	0	0	1	0	0	1	1
25	0	1	0	-1	-1	0	1	-1	-1	-1	-1	-1	600	0	3	0	0	0	0	1	0	0	1	1
25	1	-1	-1	-1	-1	-1	-1	-1	-1	-1	-1	-1	600	0	3	0	0	0	0	1	0	0	1	1
26	0	-1	-1	1	0	-1	-1	-1	-1	0	1	0	2400	0	3	1	1	1	1	1	0	1	1	1
26	0	-1	-1	-1	-1	1	0	1	0	1	0	0	3600	0	3	1	1	1	1	1	0	1	1	1
26	1	-1	-1	-1	-1	-1	-1	-1	-1	-1	-1	-1	600	1	3	1	1	1	1	1	0	1	1	1
26	0	1	0	1	0	1	0	-1	-1	-1	-1	-1	1200	0	3	1	1	1	1	1	0	1	1	1
26	0	-1	-1	0	1	1	0	1	0	-1	-1	-1	1200	1	3	1	1	1	1	1	0	1	1	1
26	1	-1	-1	-1	-1	-1	-1	-1	-1	-1	-1	-1	600	0	3	1	1	1	1	1	0	1	1	1
26	0	0	1	-1	-1	1	0	-1	-1	1	0	0	1800	0	3	1	1	1	1	1	0	1	1	1
26	0	-1	-1	-1	-1	-1	-1	1	0	-1	-1	-1	1800	1	3	1	1	1	1	1	0	1	1	1
26	1	-1	-1	-1	-1	-1	-1	-1	-1	-1	-1	-1	600	0	3	1	1	1	1	1	0	1	1	1
27	0	-1	-1	1	0	-1	-1	-1	-1	0	1	0	2400	0	3	1	0	1	1	1	1	0	1	1
27	0	1	0	1	0	1	0	-1	-1	-1	-1	-1	1200	1	3	1	0	1	1	1	1	0	1	1
27	1	-1	-1	-1	-1	-1	-1	-1	-1	-1	-1	-1	600	0	3	1	0	1	1	1	1	0	1	1
27	0	1	0	1	0	1	0	-1	-1	-1	-1	-1	1200	1	3	1	0	1	1	1	1	0	1	1
27	0	0	1	1	0	1	0	1	0	0	0	1	600	0	3	1	0	1	1	1	1	0	1	1
27	1	-1	-1	-1	-1	-1	-1	-1	-1	-1	-1	-1	600	0	3	1	0	1	1	1	1	0	1	1
27	0	-1	-1	1	0	0	1	0	1	0	0	1	1800	1	3	1	0	1	1	1	1	0	1	1
27	0	1	0	1	0	-1	-1	1	0	1	0	0	2400	0	3	1	0	1	1	1	1	0	1	1
27	1	-1	-1	-1	-1	-1	-1	-1	-1	-1	-1	-1	600	0	3	1	0	1	1	1	1	0	1	1
28	0	-1	-1	1	0	-1	-1	-1	-1	0	1	0	2400	1	3	1	1	1	1	1	0	0	1	1
28	0	-1	-1	-1	-1	1	0	0	1	-1	-1	-1	2400	0	3	1	1	1	1	1	0	0	1	1
28	1	-1	-1	-1	-1	-1	-1	-1	-1	-1	-1	-1	600	0	3	1	1	1	1	1	0	0	1	1
28	0	1	0	1	0	1	0	-1	-1	-1	-1	-1	1200	0	3	1	1	1	1	1	0	0	1	1
28	0	1	0	-1	-1	-1	-1	1	0	0	0	1	1200	0	3	1	1	1	1	1	0	0	1	1
28	1	-1	-1	-1	-1	-1	-1	-1	-1	-1	-1	-1	600	1	3	1	1	1	1	1	0	0	1	1
28	0	-1	-1	1	0	0	1	0	1	0	0	1	1800	0	3	1	1	1	1	1	0	0	1	1
28	0	0	1	-1	-1	-1	-1	0	1	0	1	0	1200	1	3	1	1	1	1	1	0	0	1	1
28	1	-1	-1	-1	-1	-1	-1	-1	-1	-1	-1	-1	600	0	3	1	1	1	1	1	0	0	1	1
29	0	-1	-1	1	0	-1	-1	-1	-1	0	1	0	2400	1	3	0	0	1	1	1	1	0	1	0
29	0	1	0	0	1	1	0	-1	-1	0	1	0	1800	0	3	0	0	1	1	1	1	0	1	0
29	1	-1	-1	-1	-1	-1	-1	-1	-1	-1	-1	-1	600	0	3	0	0	1	1	1	1	0	1	0
29	0	1	0	1	0	1	0	-1	-1	-1	-1	-1	1200	1	3	0	0	1	1	1	1	0	1	0
29	0	-1	-1	1	0	1	0	1	0	0	1	0	600	0	3	0	0	1	1	1	1	0	1	0
29	1	-1	-1	-1	-1	-1	-1	-1	-1	-1	-1	-1	600	0	3	0	0	1	1	1	1	0	1	0
29	0	-1	-1	1	0	0	1	0	1	0	0	1	1800	0	3	0	0	1	1	1	1	0	1	0
29	0	0	1	1	0	-1	-1	-1	-1	-1	-1	-1	3600	1	3	0	0	1	1	1	1	0	1	0
29	1	-1	-1	-1	-1	-1	-1	-1	-1	-1	-1	-1	600	0	3	0	0	1	1	1	1	0	1	0
30	0	-1	-1	1	0	-1	-1	-1	-1	0	1	0	2400	1	3	1	1	1	1	0	1	0	0	1
30	0	1	0	-1	-1	1	0	-1	-1	0	0	1	2400	0	3	1	1	1	1	0	1	0	0	1
30	1	-1	-1	-1	-1	-1	-1	-1	-1	-1	-1	-1	600	0	3	1	1	1	1	0	1	0	0	1
30	0	1	0	1	0	1	0	-1	-1	-1	-1	-1	1200	1	3	1	1	1	1	0	1	0	0	1
30	0	1	0	-1	-1	0	1	-1	-1	-1	-1	-1	600	0	3	1	1	1	1	0	1	0	0	1
30	1	-1	-1	-1	-1	-1	-1	-1	-1	-1	-1	-1	600	0	3	1	1	1	1	0	1	0	0	1
30	0	-1	-1	1	0	0	1	0	1	0	0	1	1800	1	3	1	1	1	1	0	1	0	0	1
30	0	1	0	1	0	1	0	0	1	-1	-1	-1	3600	0	3	1	1	1	1	0	1	0	0	1
30	1	-1	-1	-1	-1	-1	-1	-1	-1	-1	-1	-1	600	0	3	1	1	1	1	0	1	0	0	1
31	0	-1	-1	1	0	-1	-1	-1	-1	0	1	0	2400	0	3	1	0	1	0	1	0	0	0	1
31	0	1	0	-1	-1	0	1	1	0	0	1	0	3600	0	3	1	0	1	0	1	0	0	0	1
31	1	-1	-1	-1	-1	-1	-1	-1	-1	-1	-1	-1	600	1	3	1	0	1	0	1	0	0	0	1
31	0	1	0	1	0	1	0	-1	-1	-1	-1	-1	1200	1	3	1	0	1	0	1	0	0	0	1
31	0	-1	-1	-1	-1	-1	-1	1	0	-1	-1	-1	1800	0	3	1	0	1	0	1	0	0	0	1
31	1	-1	-1	-1	-1	-1	-1	-1	-1	-1	-1	-1	600	0	3	1	0	1	0	1	0	0	0	1
31	0	-1	-1	1	0	0	1	0	1	0	0	1	1800	1	3	1	0	1	0	1	0	0	0	1
31	0	1	0	1	0	-1	-1	1	0	-1	-1	-1	1800	0	3	1	0	1	0	1	0	0	0	1
31	1	-1	-1	-1	-1	-1	-1	-1	-1	-1	-1	-1	600	0	3	1	0	1	0	1	0	0	0	1
32	0	-1	-1	1	0	-1	-1	-1	-1	0	1	0	2400	0	3	1	0	1	1	1	0	0	0	1
32	0	1	0	0	1	-1	-1	0	1	1	0	0	600	1	3	1	0	1	1	1	0	0	0	1
32	1	-1	-1	-1	-1	-1	-1	-1	-1	-1	-1	-1	600	0	3	1	0	1	1	1	0	0	0	1
32	0	-1	-1	-1	-1	1	0	0	1	-1	-1	-1	2400	0	3	1	0	1	1	1	0	0	0	1
32	0	1	0	0	1	1	0	-1	-1	0	1	0	1800	1	3	1	0	1	1	1	0	0	0	1
32	1	-1	-1	-1	-1	-1	-1	-1	-1	-1	-1	-1	600	0	3	1	0	1	1	1	0	0	0	1
32	0	-1	-1	1	0	0	1	0	1	0	0	1	1800	0	3	1	0	1	1	1	0	0	0	1
32	0	-1	-1	0	1	1	0	1	0	-1	-1	-1	1200	1	3	1	0	1	1	1	0	0	0	1
32	1	-1	-1	-1	-1	-1	-1	-1	-1	-1	-1	-1	600	0	3	1	0	1	1	1	0	0	0	1
33	0	-1	-1	1	0	-1	-1	-1	-1	0	1	0	2400	0	3	1	1	1	1	1	0	0	0	1
33	0	0	1	-1	-1	1	0	-1	-1	1	0	0	1800	1	3	1	1	1	1	1	0	0	0	1
33	1	-1	-1	-1	-1	-1	-1	-1	-1	-1	-1	-1	600	0	3	1	1	1	1	1	0	0	0	1
33	0	-1	-1	-1	-1	1	0	0	1	-1	-1	-1	2400	0	3	1	1	1	1	1	0	0	0	1
33	0	1	0	-1	-1	1	0	-1	-1	0	0	1	2400	1	3	1	1	1	1	1	0	0	0	1
33	1	-1	-1	-1	-1	-1	-1	-1	-1	-1	-1	-1	600	0	3	1	1	1	1	1	0	0	0	1
33	0	-1	-1	1	0	0	1	0	1	0	0	1	1800	1	3	1	1	1	1	1	0	0	0	1
33	0	0	1	1	0	1	0	1	0	0	0	1	600	0	3	1	1	1	1	1	0	0	0	1
33	1	-1	-1	-1	-1	-1	-1	-1	-1	-1	-1	-1	600	0	3	1	1	1	1	1	0	0	0	1
34	0	-1	-1	1	0	-1	-1	-1	-1	0	1	0	2400	1	3	1	1	1	0	1	0	0	0	1
34	0	-1	-1	1	0	0	1	0	1	0	0	1	1800	0	3	1	1	1	0	1	0	0	0	1
34	1	-1	-1	-1	-1	-1	-1	-1	-1	-1	-1	-1	600	0	3	1	1	1	0	1	0	0	0	1
34	0	-1	-1	-1	-1	1	0	0	1	-1	-1	-1	2400	1	3	1	1	1	0	1	0	0	0	1
34	0	1	0	-1	-1	0	1	1	0	0	1	0	3600	0	3	1	1	1	0	1	0	0	0	1
34	1	-1	-1	-1	-1	-1	-1	-1	-1	-1	-1	-1	600	0	3	1	1	1	0	1	0	0	0	1
34	0	-1	-1	1	0	0	1	0	1	0	0	1	1800	0	3	1	1	1	0	1	0	0	0	1
34	0	1	0	-1	-1	-1	-1	1	0	0	0	1	1200	1	3	1	1	1	0	1	0	0	0	1
34	1	-1	-1	-1	-1	-1	-1	-1	-1	-1	-1	-1	600	0	3	1	1	1	0	1	0	0	0	1
35	0	-1	-1	1	0	-1	-1	-1	-1	0	1	0	2400	0	3	1	1	0	0	1	0	1	0	1
35	0	1	0	1	0	-1	-1	1	0	1	0	0	2400	0	3	1	1	0	0	1	0	1	0	1
35	1	-1	-1	-1	-1	-1	-1	-1	-1	-1	-1	-1	600	1	3	1	1	0	0	1	0	1	0	1
35	0	-1	-1	-1	-1	1	0	0	1	-1	-1	-1	2400	0	3	1	1	0	0	1	0	1	0	1
35	0	1	0	0	1	-1	-1	0	1	1	0	0	600	1	3	1	1	0	0	1	0	1	0	1
35	1	-1	-1	-1	-1	-1	-1	-1	-1	-1	-1	-1	600	0	3	1	1	0	0	1	0	1	0	1
35	0	-1	-1	1	0	0	1	0	1	0	0	1	1800	1	3	1	1	0	0	1	0	1	0	1
35	0	-1	-1	1	0	1	0	1	0	0	1	0	600	0	3	1	1	0	0	1	0	1	0	1
35	1	-1	-1	-1	-1	-1	-1	-1	-1	-1	-1	-1	600	0	3	1	1	0	0	1	0	1	0	1
36	0	-1	-1	1	0	-1	-1	-1	-1	0	1	0	2400	0	3	1	0	1	0	1	1	0	0	1
36	0	0	1	-1	-1	-1	-1	0	1	0	1	0	1200	1	3	1	0	1	0	1	1	0	0	1
36	1	-1	-1	-1	-1	-1	-1	-1	-1	-1	-1	-1	600	0	3	1	0	1	0	1	1	0	0	1
36	0	-1	-1	-1	-1	1	0	0	1	-1	-1	-1	2400	1	3	1	0	1	0	1	1	0	0	1
36	0	0	1	-1	-1	1	0	-1	-1	1	0	0	1800	0	3	1	0	1	0	1	1	0	0	1
36	1	-1	-1	-1	-1	-1	-1	-1	-1	-1	-1	-1	600	0	3	1	0	1	0	1	1	0	0	1
36	0	-1	-1	1	0	0	1	0	1	0	0	1	1800	1	3	1	0	1	0	1	1	0	0	1
36	0	1	0	-1	-1	0	1	-1	-1	-1	-1	-1	600	0	3	1	0	1	0	1	1	0	0	1
36	1	-1	-1	-1	-1	-1	-1	-1	-1	-1	-1	-1	600	0	3	1	0	1	0	1	1	0	0	1
37	0	-1	-1	1	0	-1	-1	-1	-1	0	1	0	2400	0	3	1	0	1	0	1	1	0	0	1
37	0	0	1	1	0	-1	-1	-1	-1	-1	-1	-1	3600	0	3	1	0	1	0	1	1	0	0	1
37	1	-1	-1	-1	-1	-1	-1	-1	-1	-1	-1	-1	600	1	3	1	0	1	0	1	1	0	0	1
37	0	-1	-1	-1	-1	1	0	0	1	-1	-1	-1	2400	1	3	1	0	1	0	1	1	0	0	1
37	0	-1	-1	1	0	0	1	0	1	0	0	1	1800	0	3	1	0	1	0	1	1	0	0	1
37	1	-1	-1	-1	-1	-1	-1	-1	-1	-1	-1	-1	600	0	3	1	0	1	0	1	1	0	0	1
37	0	-1	-1	1	0	0	1	0	1	0	0	1	1800	1	3	1	0	1	0	1	1	0	0	1
37	0	-1	-1	-1	-1	-1	-1	1	0	-1	-1	-1	1800	0	3	1	0	1	0	1	1	0	0	1
37	1	-1	-1	-1	-1	-1	-1	-1	-1	-1	-1	-1	600	0	3	1	0	1	0	1	1	0	0	1
38	0	-1	-1	1	0	-1	-1	-1	-1	0	1	0	2400	0	3	0	0	1	0	1	1	1	0	1
38	0	1	0	1	0	1	0	0	1	-1	-1	-1	3600	1	3	0	0	1	0	1	1	1	0	1
38	1	-1	-1	-1	-1	-1	-1	-1	-1	-1	-1	-1	600	0	3	0	0	1	0	1	1	1	0	1
38	0	-1	-1	-1	-1	1	0	0	1	-1	-1	-1	2400	0	3	0	0	1	0	1	1	1	0	1
38	0	1	0	1	0	-1	-1	1	0	1	0	0	2400	1	3	0	0	1	0	1	1	1	0	1
38	1	-1	-1	-1	-1	-1	-1	-1	-1	-1	-1	-1	600	0	3	0	0	1	0	1	1	1	0	1
38	0	1	0	1	0	-1	-1	1	0	1	0	0	2400	0	3	0	0	1	0	1	1	1	0	1
38	0	0	1	-1	-1	-1	-1	0	1	0	1	0	1200	1	3	0	0	1	0	1	1	1	0	1
38	1	-1	-1	-1	-1	-1	-1	-1	-1	-1	-1	-1	600	0	3	0	0	1	0	1	1	1	0	1
39	0	-1	-1	1	0	-1	-1	-1	-1	0	1	0	2400	0	3	0	0	0	0	1	0	1	0	1
39	0	1	0	1	0	-1	-1	1	0	-1	-1	-1	1800	0	3	0	0	0	0	1	0	1	0	1
39	1	-1	-1	-1	-1	-1	-1	-1	-1	-1	-1	-1	600	1	3	0	0	0	0	1	0	1	0	1
39	0	-1	-1	-1	-1	1	0	0	1	-1	-1	-1	2400	0	3	0	0	0	0	1	0	1	0	1
39	0	0	1	-1	-1	-1	-1	0	1	0	1	0	1200	1	3	0	0	0	0	1	0	1	0	1
39	1	-1	-1	-1	-1	-1	-1	-1	-1	-1	-1	-1	600	0	3	0	0	0	0	1	0	1	0	1
39	0	1	0	1	0	-1	-1	1	0	1	0	0	2400	0	3	0	0	0	0	1	0	1	0	1
39	0	0	1	1	0	-1	-1	-1	-1	-1	-1	-1	3600	1	3	0	0	0	0	1	0	1	0	1
39	1	-1	-1	-1	-1	-1	-1	-1	-1	-1	-1	-1	600	0	3	0	0	0	0	1	0	1	0	1
40	0	-1	-1	1	0	-1	-1	-1	-1	0	1	0	2400	0	3	0	1	0	0	0	0	1	0	1
40	0	-1	-1	0	1	1	0	1	0	-1	-1	-1	1200	1	3	0	1	0	0	0	0	1	0	1
40	1	-1	-1	-1	-1	-1	-1	-1	-1	-1	-1	-1	600	0	3	0	1	0	0	0	0	1	0	1
40	0	-1	-1	-1	-1	1	0	0	1	-1	-1	-1	2400	0	3	0	1	0	0	0	0	1	0	1
40	0	0	1	1	0	-1	-1	-1	-1	-1	-1	-1	3600	1	3	0	1	0	0	0	0	1	0	1
40	1	-1	-1	-1	-1	-1	-1	-1	-1	-1	-1	-1	600	0	3	0	1	0	0	0	0	1	0	1
40	0	1	0	1	0	-1	-1	1	0	1	0	0	2400	0	3	0	1	0	0	0	0	1	0	1
40	0	1	0	1	0	1	0	0	1	-1	-1	-1	3600	1	3	0	1	0	0	0	0	1	0	1
40	1	-1	-1	-1	-1	-1	-1	-1	-1	-1	-1	-1	600	0	3	0	1	0	0	0	0	1	0	1
41	0	-1	-1	1	0	-1	-1	-1	-1	0	1	0	2400	1	3	0	1	0	0	0	1	1	0	1
41	0	0	1	1	0	1	0	1	0	0	0	1	600	0	3	0	1	0	0	0	1	1	0	1
41	1	-1	-1	-1	-1	-1	-1	-1	-1	-1	-1	-1	600	0	3	0	1	0	0	0	1	1	0	1
41	0	-1	-1	-1	-1	1	0	0	1	-1	-1	-1	2400	0	3	0	1	0	0	0	1	1	0	1
41	0	1	0	1	0	1	0	0	1	-1	-1	-1	3600	0	3	0	1	0	0	0	1	1	0	1
41	1	-1	-1	-1	-1	-1	-1	-1	-1	-1	-1	-1	600	1	3	0	1	0	0	0	1	1	0	1
41	0	1	0	1	0	-1	-1	1	0	1	0	0	2400	0	3	0	1	0	0	0	1	1	0	1
41	0	1	0	1	0	-1	-1	1	0	-1	-1	-1	1800	1	3	0	1	0	0	0	1	1	0	1
41	1	-1	-1	-1	-1	-1	-1	-1	-1	-1	-1	-1	600	0	3	0	1	0	0	0	1	1	0	1
42	0	-1	-1	1	0	-1	-1	-1	-1	0	1	0	2400	0	3	0	1	1	1	0	1	1	0	1
42	0	1	0	-1	-1	-1	-1	1	0	0	0	1	1200	0	3	0	1	1	1	0	1	1	0	1
42	1	-1	-1	-1	-1	-1	-1	-1	-1	-1	-1	-1	600	1	3	0	1	1	1	0	1	1	0	1
42	0	-1	-1	-1	-1	1	0	0	1	-1	-1	-1	2400	0	3	0	1	1	1	0	1	1	0	1
42	0	1	0	1	0	-1	-1	1	0	-1	-1	-1	1800	1	3	0	1	1	1	0	1	1	0	1
42	1	-1	-1	-1	-1	-1	-1	-1	-1	-1	-1	-1	600	0	3	0	1	1	1	0	1	1	0	1
42	0	1	0	1	0	-1	-1	1	0	1	0	0	2400	0	3	0	1	1	1	0	1	1	0	1
42	0	-1	-1	0	1	1	0	1	0	-1	-1	-1	1200	1	3	0	1	1	1	0	1	1	0	1
42	1	-1	-1	-1	-1	-1	-1	-1	-1	-1	-1	-1	600	0	3	0	1	1	1	0	1	1	0	1
43	0	-1	-1	1	0	-1	-1	-1	-1	0	1	0	2400	1	3	0	0	0	0	1	0	0	0	1
43	0	-1	-1	1	0	1	0	1	0	0	1	0	600	0	3	0	0	0	0	1	0	0	0	1
43	1	-1	-1	-1	-1	-1	-1	-1	-1	-1	-1	-1	600	0	3	0	0	0	0	1	0	0	0	1
43	0	-1	-1	-1	-1	1	0	0	1	-1	-1	-1	2400	0	3	0	0	0	0	1	0	0	0	1
43	0	-1	-1	0	1	1	0	1	0	-1	-1	-1	1200	1	3	0	0	0	0	1	0	0	0	1
43	1	-1	-1	-1	-1	-1	-1	-1	-1	-1	-1	-1	600	0	3	0	0	0	0	1	0	0	0	1
43	0	1	0	1	0	-1	-1	1	0	1	0	0	2400	0	3	0	0	0	0	1	0	0	0	1
43	0	0	1	1	0	1	0	1	0	0	0	1	600	1	3	0	0	0	0	1	0	0	0	1
43	1	-1	-1	-1	-1	-1	-1	-1	-1	-1	-1	-1	600	0	3	0	0	0	0	1	0	0	0	1
44	0	-1	-1	1	0	-1	-1	-1	-1	0	1	0	2400	1	3	1	1	1	1	1	0	0	0	1
44	0	1	0	-1	-1	0	1	-1	-1	-1	-1	-1	600	0	3	1	1	1	1	1	0	0	0	1
44	1	-1	-1	-1	-1	-1	-1	-1	-1	-1	-1	-1	600	0	3	1	1	1	1	1	0	0	0	1
44	0	-1	-1	-1	-1	1	0	0	1	-1	-1	-1	2400	0	3	1	1	1	1	1	0	0	0	1
44	0	0	1	1	0	1	0	1	0	0	0	1	600	1	3	1	1	1	1	1	0	0	0	1
44	1	-1	-1	-1	-1	-1	-1	-1	-1	-1	-1	-1	600	0	3	1	1	1	1	1	0	0	0	1
44	0	1	0	1	0	-1	-1	1	0	1	0	0	2400	0	3	1	1	1	1	1	0	0	0	1
44	0	1	0	-1	-1	-1	-1	1	0	0	0	1	1200	0	3	1	1	1	1	1	0	0	0	1
44	1	-1	-1	-1	-1	-1	-1	-1	-1	-1	-1	-1	600	1	3	1	1	1	1	1	0	0	0	1
45	0	-1	-1	1	0	-1	-1	-1	-1	0	1	0	2400	0	3	0	0	1	1	0	1	0	0	1
45	0	-1	-1	-1	-1	-1	-1	1	0	-1	-1	-1	1800	1	3	0	0	1	1	0	1	0	0	1
45	1	-1	-1	-1	-1	-1	-1	-1	-1	-1	-1	-1	600	0	3	0	0	1	1	0	1	0	0	1
45	0	-1	-1	-1	-1	1	0	0	1	-1	-1	-1	2400	0	3	0	0	1	1	0	1	0	0	1
45	0	1	0	-1	-1	-1	-1	1	0	0	0	1	1200	1	3	0	0	1	1	0	1	0	0	1
45	1	-1	-1	-1	-1	-1	-1	-1	-1	-1	-1	-1	600	0	3	0	0	1	1	0	1	0	0	1
45	0	1	0	1	0	-1	-1	1	0	1	0	0	2400	0	3	0	0	1	1	0	1	0	0	1
45	0	-1	-1	1	0	1	0	1	0	0	1	0	600	1	3	0	0	1	1	0	1	0	0	1
45	1	-1	-1	-1	-1	-1	-1	-1	-1	-1	-1	-1	600	0	3	0	0	1	1	0	1	0	0	1
46	0	0	1	0	1	0	1	1	0	-1	-1	-1	2400	1	3	0	1	1	1	0	1	0	0	1
46	0	-1	-1	1	0	0	1	-1	-1	1	0	0	1200	0	3	0	1	1	1	0	1	0	0	1
46	1	-1	-1	-1	-1	-1	-1	-1	-1	-1	-1	-1	600	0	3	0	1	1	1	0	1	0	0	1
46	0	-1	-1	-1	-1	1	0	0	1	-1	-1	-1	2400	1	3	0	1	1	1	0	1	0	0	1
46	0	-1	-1	1	0	1	0	1	0	0	1	0	600	0	3	0	1	1	1	0	1	0	0	1
46	1	-1	-1	-1	-1	-1	-1	-1	-1	-1	-1	-1	600	0	3	0	1	1	1	0	1	0	0	1
46	0	1	0	1	0	-1	-1	1	0	1	0	0	2400	1	3	0	1	1	1	0	1	0	0	1
46	0	1	0	-1	-1	0	1	-1	-1	-1	-1	-1	600	0	3	0	1	1	1	0	1	0	0	1
46	1	-1	-1	-1	-1	-1	-1	-1	-1	-1	-1	-1	600	0	3	0	1	1	1	0	1	0	0	1
47	0	0	1	0	1	0	1	1	0	-1	-1	-1	2400	1	3	0	0	1	0	0	0	0	0	1
47	0	-1	-1	-1	-1	1	0	1	0	1	0	0	3600	0	3	0	0	1	0	0	0	0	0	1
47	1	-1	-1	-1	-1	-1	-1	-1	-1	-1	-1	-1	600	0	3	0	0	1	0	0	0	0	0	1
47	0	-1	-1	-1	-1	1	0	0	1	-1	-1	-1	2400	1	3	0	0	1	0	0	0	0	0	1
47	0	1	0	-1	-1	0	1	-1	-1	-1	-1	-1	600	0	3	0	0	1	0	0	0	0	0	1
47	1	-1	-1	-1	-1	-1	-1	-1	-1	-1	-1	-1	600	0	3	0	0	1	0	0	0	0	0	1
47	0	1	0	1	0	-1	-1	1	0	1	0	0	2400	1	3	0	0	1	0	0	0	0	0	1
47	0	-1	-1	-1	-1	-1	-1	1	0	-1	-1	-1	1800	0	3	0	0	1	0	0	0	0	0	1
47	1	-1	-1	-1	-1	-1	-1	-1	-1	-1	-1	-1	600	0	3	0	0	1	0	0	0	0	0	1
48	0	0	1	0	1	0	1	1	0	-1	-1	-1	2400	0	3	0	0	1	1	0	1	1	0	1
48	0	1	0	1	0	1	0	-1	-1	-1	-1	-1	1200	0	3	0	0	1	1	0	1	1	0	1
48	1	-1	-1	-1	-1	-1	-1	-1	-1	-1	-1	-1	600	1	3	0	0	1	1	0	1	1	0	1
48	0	-1	-1	-1	-1	1	0	0	1	-1	-1	-1	2400	0	3	0	0	1	1	0	1	1	0	1
48	0	-1	-1	-1	-1	-1	-1	1	0	-1	-1	-1	1800	0	3	0	0	1	1	0	1	1	0	1
48	1	-1	-1	-1	-1	-1	-1	-1	-1	-1	-1	-1	600	1	3	0	0	1	1	0	1	1	0	1
48	0	0	1	-1	-1	-1	-1	0	1	0	1	0	1200	0	3	0	0	1	1	0	1	1	0	1
48	0	0	1	1	0	-1	-1	-1	-1	-1	-1	-1	3600	0	3	0	0	1	1	0	1	1	0	1
48	1	-1	-1	-1	-1	-1	-1	-1	-1	-1	-1	-1	600	1	3	0	0	1	1	0	1	1	0	1
49	0	0	1	0	1	0	1	1	0	-1	-1	-1	2400	1	3	1	1	1	1	0	1	0	0	1
49	0	-1	-1	-1	-1	1	0	0	1	-1	-1	-1	2400	0	3	1	1	1	1	0	1	0	0	1
49	1	-1	-1	-1	-1	-1	-1	-1	-1	-1	-1	-1	600	0	3	1	1	1	1	0	1	0	0	1
49	0	1	0	0	1	1	0	-1	-1	0	1	0	1800	1	3	1	1	1	1	0	1	0	0	1
49	0	1	0	-1	-1	1	0	-1	-1	0	0	1	2400	0	3	1	1	1	1	0	1	0	0	1
49	1	-1	-1	-1	-1	-1	-1	-1	-1	-1	-1	-1	600	0	3	1	1	1	1	0	1	0	0	1
49	0	0	1	-1	-1	-1	-1	0	1	0	1	0	1200	0	3	1	1	1	1	0	1	0	0	1
49	0	1	0	1	0	1	0	0	1	-1	-1	-1	3600	0	3	1	1	1	1	0	1	0	0	1
49	1	-1	-1	-1	-1	-1	-1	-1	-1	-1	-1	-1	600	1	3	1	1	1	1	0	1	0	0	1
50	0	0	1	0	1	0	1	1	0	-1	-1	-1	2400	1	3	0	0	1	0	1	1	0	0	1
50	0	1	0	0	1	1	0	-1	-1	0	1	0	1800	0	3	0	0	1	0	1	1	0	0	1
50	1	-1	-1	-1	-1	-1	-1	-1	-1	-1	-1	-1	600	0	3	0	0	1	0	1	1	0	0	1
50	0	1	0	0	1	1	0	-1	-1	0	1	0	1800	1	3	0	0	1	0	1	1	0	0	1
50	0	1	0	-1	-1	0	1	1	0	0	1	0	3600	0	3	0	0	1	0	1	1	0	0	1
50	1	-1	-1	-1	-1	-1	-1	-1	-1	-1	-1	-1	600	0	3	0	0	1	0	1	1	0	0	1
50	0	0	1	-1	-1	-1	-1	0	1	0	1	0	1200	0	3	0	0	1	0	1	1	0	0	1
50	0	1	0	1	0	-1	-1	1	0	-1	-1	-1	1800	0	3	0	0	1	0	1	1	0	0	1
50	1	-1	-1	-1	-1	-1	-1	-1	-1	-1	-1	-1	600	1	3	0	0	1	0	1	1	0	0	1
51	0	0	1	0	1	0	1	1	0	-1	-1	-1	2400	0	3	0	1	1	1	0	1	0	0	1
51	0	1	0	-1	-1	1	0	-1	-1	0	0	1	2400	0	3	0	1	1	1	0	1	0	0	1
51	1	-1	-1	-1	-1	-1	-1	-1	-1	-1	-1	-1	600	1	3	0	1	1	1	0	1	0	0	1
51	0	1	0	0	1	1	0	-1	-1	0	1	0	1800	1	3	0	1	1	1	0	1	0	0	1
51	0	1	0	0	1	-1	-1	0	1	1	0	0	600	0	3	0	1	1	1	0	1	0	0	1
51	1	-1	-1	-1	-1	-1	-1	-1	-1	-1	-1	-1	600	0	3	0	1	1	1	0	1	0	0	1
51	0	0	1	-1	-1	-1	-1	0	1	0	1	0	1200	0	3	0	1	1	1	0	1	0	0	1
51	0	-1	-1	0	1	1	0	1	0	-1	-1	-1	1200	0	3	0	1	1	1	0	1	0	0	1
51	1	-1	-1	-1	-1	-1	-1	-1	-1	-1	-1	-1	600	1	3	0	1	1	1	0	1	0	0	1
52	0	0	1	0	1	0	1	1	0	-1	-1	-1	2400	0	3	0	1	1	1	0	1	1	0	1
52	0	1	0	-1	-1	0	1	1	0	0	1	0	3600	1	3	0	1	1	1	0	1	1	0	1
52	1	-1	-1	-1	-1	-1	-1	-1	-1	-1	-1	-1	600	0	3	0	1	1	1	0	1	1	0	1
52	0	1	0	0	1	1	0	-1	-1	0	1	0	1800	1	3	0	1	1	1	0	1	1	0	1
52	0	0	1	-1	-1	1	0	-1	-1	1	0	0	1800	0	3	0	1	1	1	0	1	1	0	1
52	1	-1	-1	-1	-1	-1	-1	-1	-1	-1	-1	-1	600	0	3	0	1	1	1	0	1	1	0	1
52	0	0	1	-1	-1	-1	-1	0	1	0	1	0	1200	0	3	0	1	1	1	0	1	1	0	1
52	0	0	1	1	0	1	0	1	0	0	0	1	600	0	3	0	1	1	1	0	1	1	0	1
52	1	-1	-1	-1	-1	-1	-1	-1	-1	-1	-1	-1	600	1	3	0	1	1	1	0	1	1	0	1
53	0	0	1	0	1	0	1	1	0	-1	-1	-1	2400	0	3	0	1	0	1	1	0	0	0	1
53	0	1	0	0	1	-1	-1	0	1	1	0	0	600	1	3	0	1	0	1	1	0	0	0	1
53	1	-1	-1	-1	-1	-1	-1	-1	-1	-1	-1	-1	600	0	3	0	1	0	1	1	0	0	0	1
53	0	1	0	0	1	1	0	-1	-1	0	1	0	1800	1	3	0	1	0	1	1	0	0	0	1
53	0	-1	-1	1	0	0	1	0	1	0	0	1	1800	0	3	0	1	0	1	1	0	0	0	1
53	1	-1	-1	-1	-1	-1	-1	-1	-1	-1	-1	-1	600	0	3	0	1	0	1	1	0	0	0	1
53	0	0	1	-1	-1	-1	-1	0	1	0	1	0	1200	0	3	0	1	0	1	1	0	0	0	1
53	0	1	0	-1	-1	-1	-1	1	0	0	0	1	1200	1	3	0	1	0	1	1	0	0	0	1
53	1	-1	-1	-1	-1	-1	-1	-1	-1	-1	-1	-1	600	0	3	0	1	0	1	1	0	0	0	1
54	0	0	1	0	1	0	1	1	0	-1	-1	-1	2400	1	3	0	1	1	0	1	0	0	0	1
54	0	0	1	-1	-1	1	0	-1	-1	1	0	0	1800	0	3	0	1	1	0	1	0	0	0	1
54	1	-1	-1	-1	-1	-1	-1	-1	-1	-1	-1	-1	600	0	3	0	1	1	0	1	0	0	0	1
54	0	1	0	0	1	1	0	-1	-1	0	1	0	1800	1	3	0	1	1	0	1	0	0	0	1
54	0	1	0	1	0	-1	-1	1	0	1	0	0	2400	0	3	0	1	1	0	1	0	0	0	1
54	1	-1	-1	-1	-1	-1	-1	-1	-1	-1	-1	-1	600	0	3	0	1	1	0	1	0	0	0	1
54	0	0	1	-1	-1	-1	-1	0	1	0	1	0	1200	0	3	0	1	1	0	1	0	0	0	1
54	0	-1	-1	1	0	1	0	1	0	0	1	0	600	1	3	0	1	1	0	1	0	0	0	1
54	1	-1	-1	-1	-1	-1	-1	-1	-1	-1	-1	-1	600	0	3	0	1	1	0	1	0	0	0	1
55	0	0	1	0	1	0	1	1	0	-1	-1	-1	2400	0	3	0	0	0	0	1	1	1	0	1
55	0	-1	-1	1	0	0	1	0	1	0	0	1	1800	1	3	0	0	0	0	1	1	1	0	1
55	1	-1	-1	-1	-1	-1	-1	-1	-1	-1	-1	-1	600	0	3	0	0	0	0	1	1	1	0	1
55	0	1	0	0	1	1	0	-1	-1	0	1	0	1800	1	3	0	0	0	0	1	1	1	0	1
55	0	0	1	-1	-1	-1	-1	0	1	0	1	0	1200	0	3	0	0	0	0	1	1	1	0	1
55	1	-1	-1	-1	-1	-1	-1	-1	-1	-1	-1	-1	600	0	3	0	0	0	0	1	1	1	0	1
55	0	0	1	-1	-1	-1	-1	0	1	0	1	0	1200	0	3	0	0	0	0	1	1	1	0	1
55	0	1	0	-1	-1	0	1	-1	-1	-1	-1	-1	600	0	3	0	0	0	0	1	1	1	0	1
55	1	-1	-1	-1	-1	-1	-1	-1	-1	-1	-1	-1	600	1	3	0	0	0	0	1	1	1	0	1
56	0	0	1	0	1	0	1	1	0	-1	-1	-1	2400	0	3	1	0	0	0	1	0	0	0	1
56	0	1	0	1	0	-1	-1	1	0	1	0	0	2400	0	3	1	0	0	0	1	0	0	0	1
56	1	-1	-1	-1	-1	-1	-1	-1	-1	-1	-1	-1	600	1	3	1	0	0	0	1	0	0	0	1
56	0	1	0	0	1	1	0	-1	-1	0	1	0	1800	1	3	1	0	0	0	1	0	0	0	1
56	0	0	1	1	0	-1	-1	-1	-1	-1	-1	-1	3600	0	3	1	0	0	0	1	0	0	0	1
56	1	-1	-1	-1	-1	-1	-1	-1	-1	-1	-1	-1	600	0	3	1	0	0	0	1	0	0	0	1
56	0	0	1	-1	-1	-1	-1	0	1	0	1	0	1200	1	3	1	0	0	0	1	0	0	0	1
56	0	-1	-1	-1	-1	-1	-1	1	0	-1	-1	-1	1800	0	3	1	0	0	0	1	0	0	0	1
56	1	-1	-1	-1	-1	-1	-1	-1	-1	-1	-1	-1	600	0	3	1	0	0	0	1	0	0	0	1
57	0	0	1	0	1	0	1	1	0	-1	-1	-1	2400	0	3	0	0	1	0	1	1	1	0	0
57	0	0	1	-1	-1	-1	-1	0	1	0	1	0	1200	0	3	0	0	1	0	1	1	1	0	0
57	1	-1	-1	-1	-1	-1	-1	-1	-1	-1	-1	-1	600	1	3	0	0	1	0	1	1	1	0	0
57	0	1	0	0	1	1	0	-1	-1	0	1	0	1800	1	3	0	0	1	0	1	1	1	0	0
57	0	1	0	1	0	1	0	0	1	-1	-1	-1	3600	0	3	0	0	1	0	1	1	1	0	0
57	1	-1	-1	-1	-1	-1	-1	-1	-1	-1	-1	-1	600	0	3	0	0	1	0	1	1	1	0	0
57	0	0	1	1	0	-1	-1	-1	-1	-1	-1	-1	3600	0	3	0	0	1	0	1	1	1	0	0
57	0	1	0	1	0	1	0	0	1	-1	-1	-1	3600	1	3	0	0	1	0	1	1	1	0	0
57	1	-1	-1	-1	-1	-1	-1	-1	-1	-1	-1	-1	600	0	3	0	0	1	0	1	1	1	0	0
58	0	0	1	0	1	0	1	1	0	-1	-1	-1	2400	1	3	1	1	1	1	1	0	0	0	1
58	0	0	1	1	0	-1	-1	-1	-1	-1	-1	-1	3600	0	3	1	1	1	1	1	0	0	0	1
58	1	-1	-1	-1	-1	-1	-1	-1	-1	-1	-1	-1	600	0	3	1	1	1	1	1	0	0	0	1
58	0	1	0	0	1	1	0	-1	-1	0	1	0	1800	1	3	1	1	1	1	1	0	0	0	1
58	0	1	0	1	0	-1	-1	1	0	-1	-1	-1	1800	0	3	1	1	1	1	1	0	0	0	1
58	1	-1	-1	-1	-1	-1	-1	-1	-1	-1	-1	-1	600	0	3	1	1	1	1	1	0	0	0	1
58	0	0	1	1	0	-1	-1	-1	-1	-1	-1	-1	3600	0	3	1	1	1	1	1	0	0	0	1
58	0	1	0	1	0	-1	-1	1	0	-1	-1	-1	1800	1	3	1	1	1	1	1	0	0	0	1
58	1	-1	-1	-1	-1	-1	-1	-1	-1	-1	-1	-1	600	0	3	1	1	1	1	1	0	0	0	1
59	0	0	1	0	1	0	1	1	0	-1	-1	-1	2400	0	3	1	1	1	1	1	0	0	0	1
59	0	1	0	1	0	1	0	0	1	-1	-1	-1	3600	1	3	1	1	1	1	1	0	0	0	1
59	1	-1	-1	-1	-1	-1	-1	-1	-1	-1	-1	-1	600	0	3	1	1	1	1	1	0	0	0	1
59	0	1	0	0	1	1	0	-1	-1	0	1	0	1800	1	3	1	1	1	1	1	0	0	0	1
59	0	-1	-1	0	1	1	0	1	0	-1	-1	-1	1200	0	3	1	1	1	1	1	0	0	0	1
59	1	-1	-1	-1	-1	-1	-1	-1	-1	-1	-1	-1	600	0	3	1	1	1	1	1	0	0	0	1
59	0	0	1	1	0	-1	-1	-1	-1	-1	-1	-1	3600	0	3	1	1	1	1	1	0	0	0	1
59	0	-1	-1	0	1	1	0	1	0	-1	-1	-1	1200	1	3	1	1	1	1	1	0	0	0	1
59	1	-1	-1	-1	-1	-1	-1	-1	-1	-1	-1	-1	600	0	3	1	1	1	1	1	0	0	0	1
60	0	0	1	0	1	0	1	1	0	-1	-1	-1	2400	0	3	1	1	1	0	1	0	0	0	1
60	0	1	0	1	0	-1	-1	1	0	-1	-1	-1	1800	0	3	1	1	1	0	1	0	0	0	1
60	1	-1	-1	-1	-1	-1	-1	-1	-1	-1	-1	-1	600	1	3	1	1	1	0	1	0	0	0	1
60	0	1	0	0	1	1	0	-1	-1	0	1	0	1800	1	3	1	1	1	0	1	0	0	0	1
60	0	0	1	1	0	1	0	1	0	0	0	1	600	0	3	1	1	1	0	1	0	0	0	1
60	1	-1	-1	-1	-1	-1	-1	-1	-1	-1	-1	-1	600	0	3	1	1	1	0	1	0	0	0	1
60	0	0	1	1	0	-1	-1	-1	-1	-1	-1	-1	3600	0	3	1	1	1	0	1	0	0	0	1
60	0	0	1	1	0	1	0	1	0	0	0	1	600	1	3	1	1	1	0	1	0	0	0	1
60	1	-1	-1	-1	-1	-1	-1	-1	-1	-1	-1	-1	600	0	3	1	1	1	0	1	0	0	0	1
61	0	0	1	0	1	0	1	1	0	-1	-1	-1	2400	0	3	0	0	1	0	1	1	0	0	1
61	0	-1	-1	0	1	1	0	1	0	-1	-1	-1	1200	0	3	0	0	1	0	1	1	0	0	1
61	1	-1	-1	-1	-1	-1	-1	-1	-1	-1	-1	-1	600	1	3	0	0	1	0	1	1	0	0	1
61	0	1	0	0	1	1	0	-1	-1	0	1	0	1800	1	3	0	0	1	0	1	1	0	0	1
61	0	1	0	-1	-1	-1	-1	1	0	0	0	1	1200	0	3	0	0	1	0	1	1	0	0	1
61	1	-1	-1	-1	-1	-1	-1	-1	-1	-1	-1	-1	600	0	3	0	0	1	0	1	1	0	0	1
61	0	0	1	1	0	-1	-1	-1	-1	-1	-1	-1	3600	0	3	0	0	1	0	1	1	0	0	1
61	0	1	0	-1	-1	-1	-1	1	0	0	0	1	1200	1	3	0	0	1	0	1	1	0	0	1
61	1	-1	-1	-1	-1	-1	-1	-1	-1	-1	-1	-1	600	0	3	0	0	1	0	1	1	0	0	1
62	0	0	1	0	1	0	1	1	0	-1	-1	-1	2400	0	3	0	0	0	0	1	0	0	0	1
62	0	0	1	1	0	1	0	1	0	0	0	1	600	0	3	0	0	0	0	1	0	0	0	1
62	1	-1	-1	-1	-1	-1	-1	-1	-1	-1	-1	-1	600	1	3	0	0	0	0	1	0	0	0	1
62	0	1	0	0	1	1	0	-1	-1	0	1	0	1800	1	3	0	0	0	0	1	0	0	0	1
62	0	-1	-1	1	0	1	0	1	0	0	1	0	600	0	3	0	0	0	0	1	0	0	0	1
62	1	-1	-1	-1	-1	-1	-1	-1	-1	-1	-1	-1	600	0	3	0	0	0	0	1	0	0	0	1
62	0	0	1	1	0	-1	-1	-1	-1	-1	-1	-1	3600	0	3	0	0	0	0	1	0	0	0	1
62	0	-1	-1	1	0	1	0	1	0	0	1	0	600	1	3	0	0	0	0	1	0	0	0	1
62	1	-1	-1	-1	-1	-1	-1	-1	-1	-1	-1	-1	600	0	3	0	0	0	0	1	0	0	0	1
63	0	0	1	0	1	0	1	1	0	-1	-1	-1	2400	0	3	0	1	0	1	1	0	0	0	1
63	0	1	0	-1	-1	-1	-1	1	0	0	0	1	1200	1	3	0	1	0	1	1	0	0	0	1
63	1	-1	-1	-1	-1	-1	-1	-1	-1	-1	-1	-1	600	0	3	0	1	0	1	1	0	0	0	1
63	0	1	0	0	1	1	0	-1	-1	0	1	0	1800	1	3	0	1	0	1	1	0	0	0	1
63	0	1	0	-1	-1	0	1	-1	-1	-1	-1	-1	600	0	3	0	1	0	1	1	0	0	0	1
63	1	-1	-1	-1	-1	-1	-1	-1	-1	-1	-1	-1	600	0	3	0	1	0	1	1	0	0	0	1
63	0	0	1	1	0	-1	-1	-1	-1	-1	-1	-1	3600	0	3	0	1	0	1	1	0	0	0	1
63	0	1	0	-1	-1	0	1	-1	-1	-1	-1	-1	600	0	3	0	1	0	1	1	0	0	0	1
63	1	-1	-1	-1	-1	-1	-1	-1	-1	-1	-1	-1	600	1	3	0	1	0	1	1	0	0	0	1
64	0	0	1	0	1	0	1	1	0	-1	-1	-1	2400	0	3	0	1	1	1	0	1	1	0	1
64	0	-1	-1	1	0	1	0	1	0	0	1	0	600	0	3	0	1	1	1	0	1	1	0	1
64	1	-1	-1	-1	-1	-1	-1	-1	-1	-1	-1	-1	600	1	3	0	1	1	1	0	1	1	0	1
64	0	1	0	0	1	1	0	-1	-1	0	1	0	1800	1	3	0	1	1	1	0	1	1	0	1
64	0	-1	-1	-1	-1	-1	-1	1	0	-1	-1	-1	1800	0	3	0	1	1	1	0	1	1	0	1
64	1	-1	-1	-1	-1	-1	-1	-1	-1	-1	-1	-1	600	0	3	0	1	1	1	0	1	1	0	1
64	0	0	1	1	0	-1	-1	-1	-1	-1	-1	-1	3600	0	3	0	1	1	1	0	1	1	0	1
64	0	-1	-1	-1	-1	-1	-1	1	0	-1	-1	-1	1800	0	3	0	1	1	1	0	1	1	0	1
64	1	-1	-1	-1	-1	-1	-1	-1	-1	-1	-1	-1	600	1	3	0	1	1	1	0	1	1	0	1
65	0	0	1	0	1	0	1	1	0	-1	-1	-1	2400	0	3	0	1	1	0	1	0	1	0	1
65	0	1	0	-1	-1	0	1	-1	-1	-1	-1	-1	600	0	3	0	1	1	0	1	0	1	0	1
65	1	-1	-1	-1	-1	-1	-1	-1	-1	-1	-1	-1	600	1	3	0	1	1	0	1	0	1	0	1
65	0	1	0	-1	-1	1	0	-1	-1	0	0	1	2400	0	3	0	1	1	0	1	0	1	0	1
65	0	1	0	-1	-1	0	1	1	0	0	1	0	3600	1	3	0	1	1	0	1	0	1	0	1
65	1	-1	-1	-1	-1	-1	-1	-1	-1	-1	-1	-1	600	0	3	0	1	1	0	1	0	1	0	1
65	0	1	0	1	0	1	0	0	1	-1	-1	-1	3600	1	3	0	1	1	0	1	0	1	0	1
65	0	1	0	1	0	-1	-1	1	0	-1	-1	-1	1800	0	3	0	1	1	0	1	0	1	0	1
65	1	-1	-1	-1	-1	-1	-1	-1	-1	-1	-1	-1	600	0	3	0	1	1	0	1	0	1	0	1
66	0	0	1	0	1	0	1	1	0	-1	-1	-1	2400	1	3	0	1	0	0	0	1	1	0	1
66	0	-1	-1	-1	-1	-1	-1	1	0	-1	-1	-1	1800	0	3	0	1	0	0	0	1	1	0	1
66	1	-1	-1	-1	-1	-1	-1	-1	-1	-1	-1	-1	600	0	3	0	1	0	0	0	1	1	0	1
66	0	1	0	-1	-1	1	0	-1	-1	0	0	1	2400	0	3	0	1	0	0	0	1	1	0	1
66	0	1	0	0	1	-1	-1	0	1	1	0	0	600	1	3	0	1	0	0	0	1	1	0	1
66	1	-1	-1	-1	-1	-1	-1	-1	-1	-1	-1	-1	600	0	3	0	1	0	0	0	1	1	0	1
66	0	1	0	1	0	1	0	0	1	-1	-1	-1	3600	1	3	0	1	0	0	0	1	1	0	1
66	0	-1	-1	0	1	1	0	1	0	-1	-1	-1	1200	0	3	0	1	0	0	0	1	1	0	1
66	1	-1	-1	-1	-1	-1	-1	-1	-1	-1	-1	-1	600	0	3	0	1	0	0	0	1	1	0	1
67	0	-1	-1	1	0	0	1	-1	-1	1	0	0	1200	0	3	0	0	1	0	1	1	1	0	1
67	0	-1	-1	-1	-1	1	0	1	0	1	0	0	3600	0	3	0	0	1	0	1	1	1	0	1
67	1	-1	-1	-1	-1	-1	-1	-1	-1	-1	-1	-1	600	1	3	0	0	1	0	1	1	1	0	1
67	0	1	0	-1	-1	1	0	-1	-1	0	0	1	2400	1	3	0	0	1	0	1	1	1	0	1
67	0	0	1	-1	-1	1	0	-1	-1	1	0	0	1800	0	3	0	0	1	0	1	1	1	0	1
67	1	-1	-1	-1	-1	-1	-1	-1	-1	-1	-1	-1	600	0	3	0	0	1	0	1	1	1	0	1
67	0	1	0	1	0	1	0	0	1	-1	-1	-1	3600	0	3	0	0	1	0	1	1	1	0	1
67	0	0	1	1	0	1	0	1	0	0	0	1	600	0	3	0	0	1	0	1	1	1	0	1
67	1	-1	-1	-1	-1	-1	-1	-1	-1	-1	-1	-1	600	1	3	0	0	1	0	1	1	1	0	1
68	0	-1	-1	1	0	0	1	-1	-1	1	0	0	1200	0	3	0	0	0	0	1	1	1	0	1
68	0	1	0	1	0	1	0	-1	-1	-1	-1	-1	1200	1	3	0	0	0	0	1	1	1	0	1
68	1	-1	-1	-1	-1	-1	-1	-1	-1	-1	-1	-1	600	0	3	0	0	0	0	1	1	1	0	1
68	0	1	0	-1	-1	1	0	-1	-1	0	0	1	2400	0	3	0	0	0	0	1	1	1	0	1
68	0	-1	-1	1	0	0	1	0	1	0	0	1	1800	0	3	0	0	0	0	1	1	1	0	1
68	1	-1	-1	-1	-1	-1	-1	-1	-1	-1	-1	-1	600	1	3	0	0	0	0	1	1	1	0	1
68	0	1	0	1	0	1	0	0	1	-1	-1	-1	3600	0	3	0	0	0	0	1	1	1	0	1
68	0	1	0	-1	-1	-1	-1	1	0	0	0	1	1200	0	3	0	0	0	0	1	1	1	0	1
68	1	-1	-1	-1	-1	-1	-1	-1	-1	-1	-1	-1	600	1	3	0	0	0	0	1	1	1	0	1
69	0	-1	-1	1	0	0	1	-1	-1	1	0	0	1200	0	3	1	1	0	0	1	0	1	0	1
69	0	-1	-1	-1	-1	1	0	0	1	-1	-1	-1	2400	0	3	1	1	0	0	1	0	1	0	1
69	1	-1	-1	-1	-1	-1	-1	-1	-1	-1	-1	-1	600	1	3	1	1	0	0	1	0	1	0	1
69	0	1	0	-1	-1	1	0	-1	-1	0	0	1	2400	0	3	1	1	0	0	1	0	1	0	1
69	0	1	0	1	0	-1	-1	1	0	1	0	0	2400	0	3	1	1	0	0	1	0	1	0	1
69	1	-1	-1	-1	-1	-1	-1	-1	-1	-1	-1	-1	600	1	3	1	1	0	0	1	0	1	0	1
69	0	1	0	1	0	1	0	0	1	-1	-1	-1	3600	0	3	1	1	0	0	1	0	1	0	1
69	0	-1	-1	1	0	1	0	1	0	0	1	0	600	0	3	1	1	0	0	1	0	1	0	1
69	1	-1	-1	-1	-1	-1	-1	-1	-1	-1	-1	-1	600	1	3	1	1	0	0	1	0	1	0	1
70	0	-1	-1	1	0	0	1	-1	-1	1	0	0	1200	0	3	0	0	1	0	1	1	1	0	0
70	0	1	0	0	1	1	0	-1	-1	0	1	0	1800	1	3	0	0	1	0	1	1	1	0	0
70	1	-1	-1	-1	-1	-1	-1	-1	-1	-1	-1	-1	600	0	3	0	0	1	0	1	1	1	0	0
70	0	1	0	-1	-1	1	0	-1	-1	0	0	1	2400	0	3	0	0	1	0	1	1	1	0	0
70	0	0	1	-1	-1	-1	-1	0	1	0	1	0	1200	0	3	0	0	1	0	1	1	1	0	0
70	1	-1	-1	-1	-1	-1	-1	-1	-1	-1	-1	-1	600	1	3	0	0	1	0	1	1	1	0	0
70	0	1	0	1	0	1	0	0	1	-1	-1	-1	3600	1	3	0	0	1	0	1	1	1	0	0
70	0	1	0	-1	-1	0	1	-1	-1	-1	-1	-1	600	0	3	0	0	1	0	1	1	1	0	0
70	1	-1	-1	-1	-1	-1	-1	-1	-1	-1	-1	-1	600	0	3	0	0	1	0	1	1	1	0	0
71	0	-1	-1	1	0	0	1	-1	-1	1	0	0	1200	0	3	0	0	0	0	1	0	1	0	1
71	0	1	0	-1	-1	1	0	-1	-1	0	0	1	2400	1	3	0	0	0	0	1	0	1	0	1
71	1	-1	-1	-1	-1	-1	-1	-1	-1	-1	-1	-1	600	0	3	0	0	0	0	1	0	1	0	1
71	0	1	0	-1	-1	1	0	-1	-1	0	0	1	2400	1	3	0	0	0	0	1	0	1	0	1
71	0	0	1	1	0	-1	-1	-1	-1	-1	-1	-1	3600	0	3	0	0	0	0	1	0	1	0	1
71	1	-1	-1	-1	-1	-1	-1	-1	-1	-1	-1	-1	600	0	3	0	0	0	0	1	0	1	0	1
71	0	1	0	1	0	1	0	0	1	-1	-1	-1	3600	1	3	0	0	0	0	1	0	1	0	1
71	0	-1	-1	-1	-1	-1	-1	1	0	-1	-1	-1	1800	0	3	0	0	0	0	1	0	1	0	1
71	1	-1	-1	-1	-1	-1	-1	-1	-1	-1	-1	-1	600	0	3	0	0	0	0	1	0	1	0	1
72	0	-1	-1	1	0	0	1	-1	-1	1	0	0	1200	0	3	0	1	1	0	1	0	1	0	1
72	0	1	0	-1	-1	0	1	1	0	0	1	0	3600	1	3	0	1	1	0	1	0	1	0	1
72	1	-1	-1	-1	-1	-1	-1	-1	-1	-1	-1	-1	600	0	3	0	1	1	0	1	0	1	0	1
72	0	1	0	-1	-1	1	0	-1	-1	0	0	1	2400	0	3	0	1	1	0	1	0	1	0	1
72	0	1	0	1	0	1	0	0	1	-1	-1	-1	3600	1	3	0	1	1	0	1	0	1	0	1
72	1	-1	-1	-1	-1	-1	-1	-1	-1	-1	-1	-1	600	0	3	0	1	1	0	1	0	1	0	1
72	0	1	0	1	0	-1	-1	1	0	-1	-1	-1	1800	0	3	0	1	1	0	1	0	1	0	1
72	0	-1	-1	0	1	1	0	1	0	-1	-1	-1	1200	0	3	0	1	1	0	1	0	1	0	1
72	1	-1	-1	-1	-1	-1	-1	-1	-1	-1	-1	-1	600	1	3	0	1	1	0	1	0	1	0	1
73	0	-1	-1	1	0	0	1	-1	-1	1	0	0	1200	0	3	0	1	1	1	1	1	0	0	1
73	0	1	0	0	1	-1	-1	0	1	1	0	0	600	1	3	0	1	1	1	1	1	0	0	1
73	1	-1	-1	-1	-1	-1	-1	-1	-1	-1	-1	-1	600	0	3	0	1	1	1	1	1	0	0	1
73	0	1	0	-1	-1	1	0	-1	-1	0	0	1	2400	0	3	0	1	1	1	1	1	0	0	1
73	0	1	0	1	0	-1	-1	1	0	-1	-1	-1	1800	0	3	0	1	1	1	1	1	0	0	1
73	1	-1	-1	-1	-1	-1	-1	-1	-1	-1	-1	-1	600	1	3	0	1	1	1	1	1	0	0	1
73	0	1	0	1	0	-1	-1	1	0	-1	-1	-1	1800	0	3	0	1	1	1	1	1	0	0	1
73	0	0	1	1	0	1	0	1	0	0	0	1	600	0	3	0	1	1	1	1	1	0	0	1
73	1	-1	-1	-1	-1	-1	-1	-1	-1	-1	-1	-1	600	1	3	0	1	1	1	1	1	0	0	1
74	0	-1	-1	1	0	0	1	-1	-1	1	0	0	1200	0	3	0	0	1	0	1	0	0	0	1
74	0	0	1	-1	-1	1	0	-1	-1	1	0	0	1800	0	3	0	0	1	0	1	0	0	0	1
74	1	-1	-1	-1	-1	-1	-1	-1	-1	-1	-1	-1	600	1	3	0	0	1	0	1	0	0	0	1
74	0	1	0	-1	-1	1	0	-1	-1	0	0	1	2400	0	3	0	0	1	0	1	0	0	0	1
74	0	-1	-1	0	1	1	0	1	0	-1	-1	-1	1200	0	3	0	0	1	0	1	0	0	0	1
74	1	-1	-1	-1	-1	-1	-1	-1	-1	-1	-1	-1	600	1	3	0	0	1	0	1	0	0	0	1
74	0	1	0	1	0	-1	-1	1	0	-1	-1	-1	1800	0	3	0	0	1	0	1	0	0	0	1
74	0	1	0	-1	-1	-1	-1	1	0	0	0	1	1200	0	3	0	0	1	0	1	0	0	0	1
74	1	-1	-1	-1	-1	-1	-1	-1	-1	-1	-1	-1	600	1	3	0	0	1	0	1	0	0	0	1
75	0	-1	-1	1	0	0	1	-1	-1	1	0	0	1200	0	3	0	0	1	1	1	1	1	0	1
75	0	-1	-1	1	0	0	1	0	1	0	0	1	1800	1	3	0	0	1	1	1	1	1	0	1
75	1	-1	-1	-1	-1	-1	-1	-1	-1	-1	-1	-1	600	0	3	0	0	1	1	1	1	1	0	1
75	0	1	0	-1	-1	1	0	-1	-1	0	0	1	2400	0	3	0	0	1	1	1	1	1	0	1
75	0	0	1	1	0	1	0	1	0	0	0	1	600	0	3	0	0	1	1	1	1	1	0	1
75	1	-1	-1	-1	-1	-1	-1	-1	-1	-1	-1	-1	600	1	3	0	0	1	1	1	1	1	0	1
75	0	1	0	1	0	-1	-1	1	0	-1	-1	-1	1800	0	3	0	0	1	1	1	1	1	0	1
75	0	-1	-1	1	0	1	0	1	0	0	1	0	600	0	3	0	0	1	1	1	1	1	0	1
75	1	-1	-1	-1	-1	-1	-1	-1	-1	-1	-1	-1	600	1	3	0	0	1	1	1	1	1	0	1
76	0	-1	-1	1	0	0	1	-1	-1	1	0	0	1200	0	3	0	1	1	1	1	1	0	0	1
76	0	1	0	1	0	-1	-1	1	0	1	0	0	2400	0	3	0	1	1	1	1	1	0	0	1
76	1	-1	-1	-1	-1	-1	-1	-1	-1	-1	-1	-1	600	1	3	0	1	1	1	1	1	0	0	1
76	0	1	0	-1	-1	1	0	-1	-1	0	0	1	2400	0	3	0	1	1	1	1	1	0	0	1
76	0	1	0	-1	-1	-1	-1	1	0	0	0	1	1200	0	3	0	1	1	1	1	1	0	0	1
76	1	-1	-1	-1	-1	-1	-1	-1	-1	-1	-1	-1	600	1	3	0	1	1	1	1	1	0	0	1
76	0	1	0	1	0	-1	-1	1	0	-1	-1	-1	1800	0	3	0	1	1	1	1	1	0	0	1
76	0	1	0	-1	-1	0	1	-1	-1	-1	-1	-1	600	0	3	0	1	1	1	1	1	0	0	1
76	1	-1	-1	-1	-1	-1	-1	-1	-1	-1	-1	-1	600	1	3	0	1	1	1	1	1	0	0	1
77	0	-1	-1	1	0	0	1	-1	-1	1	0	0	1200	1	3	0	0	1	1	1	1	0	0	1
77	0	0	1	-1	-1	-1	-1	0	1	0	1	0	1200	0	3	0	0	1	1	1	1	0	0	1
77	1	-1	-1	-1	-1	-1	-1	-1	-1	-1	-1	-1	600	0	3	0	0	1	1	1	1	0	0	1
77	0	1	0	-1	-1	1	0	-1	-1	0	0	1	2400	0	3	0	0	1	1	1	1	0	0	1
77	0	-1	-1	1	0	1	0	1	0	0	1	0	600	0	3	0	0	1	1	1	1	0	0	1
77	1	-1	-1	-1	-1	-1	-1	-1	-1	-1	-1	-1	600	1	3	0	0	1	1	1	1	0	0	1
77	0	1	0	1	0	-1	-1	1	0	-1	-1	-1	1800	1	3	0	0	1	1	1	1	0	0	1
77	0	-1	-1	-1	-1	-1	-1	1	0	-1	-1	-1	1800	0	3	0	0	1	1	1	1	0	0	1
77	1	-1	-1	-1	-1	-1	-1	-1	-1	-1	-1	-1	600	0	3	0	0	1	1	1	1	0	0	1
78	0	-1	-1	1	0	0	1	-1	-1	1	0	0	1200	1	3	0	1	1	1	1	1	1	0	1
78	0	0	1	1	0	-1	-1	-1	-1	-1	-1	-1	3600	0	3	0	1	1	1	1	1	1	0	1
78	1	-1	-1	-1	-1	-1	-1	-1	-1	-1	-1	-1	600	0	3	0	1	1	1	1	1	1	0	1
78	0	1	0	-1	-1	1	0	-1	-1	0	0	1	2400	0	3	0	1	1	1	1	1	1	0	1
78	0	1	0	-1	-1	0	1	-1	-1	-1	-1	-1	600	0	3	0	1	1	1	1	1	1	0	1
78	1	-1	-1	-1	-1	-1	-1	-1	-1	-1	-1	-1	600	1	3	0	1	1	1	1	1	1	0	1
78	0	-1	-1	0	1	1	0	1	0	-1	-1	-1	1200	0	3	0	1	1	1	1	1	1	0	1
78	0	0	1	1	0	1	0	1	0	0	0	1	600	1	3	0	1	1	1	1	1	1	0	1
78	1	-1	-1	-1	-1	-1	-1	-1	-1	-1	-1	-1	600	0	3	0	1	1	1	1	1	1	0	1
79	0	-1	-1	1	0	0	1	-1	-1	1	0	0	1200	0	3	0	0	0	0	1	1	1	0	1
79	0	1	0	1	0	1	0	0	1	-1	-1	-1	3600	0	3	0	0	0	0	1	1	1	0	1
79	1	-1	-1	-1	-1	-1	-1	-1	-1	-1	-1	-1	600	1	3	0	0	0	0	1	1	1	0	1
79	0	1	0	-1	-1	1	0	-1	-1	0	0	1	2400	1	3	0	0	0	0	1	1	1	0	1
79	0	-1	-1	-1	-1	-1	-1	1	0	-1	-1	-1	1800	0	3	0	0	0	0	1	1	1	0	1
79	1	-1	-1	-1	-1	-1	-1	-1	-1	-1	-1	-1	600	0	3	0	0	0	0	1	1	1	0	1
79	0	-1	-1	0	1	1	0	1	0	-1	-1	-1	1200	0	3	0	0	0	0	1	1	1	0	1
79	0	1	0	-1	-1	-1	-1	1	0	0	0	1	1200	1	3	0	0	0	0	1	1	1	0	1
79	1	-1	-1	-1	-1	-1	-1	-1	-1	-1	-1	-1	600	0	3	0	0	0	0	1	1	1	0	1
80	0	-1	-1	1	0	0	1	-1	-1	1	0	0	1200	0	3	0	0	1	1	1	1	0	1	1
80	0	1	0	1	0	-1	-1	1	0	-1	-1	-1	1800	0	3	0	0	1	1	1	1	0	1	1
80	1	-1	-1	-1	-1	-1	-1	-1	-1	-1	-1	-1	600	1	3	0	0	1	1	1	1	0	1	1
80	0	1	0	-1	-1	0	1	1	0	0	1	0	3600	0	3	0	0	1	1	1	1	0	1	1
80	0	1	0	0	1	-1	-1	0	1	1	0	0	600	1	3	0	0	1	1	1	1	0	1	1
80	1	-1	-1	-1	-1	-1	-1	-1	-1	-1	-1	-1	600	0	3	0	0	1	1	1	1	0	1	1
80	0	-1	-1	0	1	1	0	1	0	-1	-1	-1	1200	0	3	0	0	1	1	1	1	0	1	1
80	0	-1	-1	1	0	1	0	1	0	0	1	0	600	1	3	0	0	1	1	1	1	0	1	1
80	1	-1	-1	-1	-1	-1	-1	-1	-1	-1	-1	-1	600	0	3	0	0	1	1	1	1	0	1	1
81	0	-1	-1	1	0	0	1	-1	-1	1	0	0	1200	0	3	1	0	1	0	1	1	0	1	1
81	0	-1	-1	0	1	1	0	1	0	-1	-1	-1	1200	0	3	1	0	1	0	1	1	0	1	1
81	1	-1	-1	-1	-1	-1	-1	-1	-1	-1	-1	-1	600	1	3	1	0	1	0	1	1	0	1	1
81	0	1	0	-1	-1	0	1	1	0	0	1	0	3600	1	3	1	0	1	0	1	1	0	1	1
81	0	0	1	-1	-1	1	0	-1	-1	1	0	0	1800	0	3	1	0	1	0	1	1	0	1	1
81	1	-1	-1	-1	-1	-1	-1	-1	-1	-1	-1	-1	600	0	3	1	0	1	0	1	1	0	1	1
81	0	-1	-1	0	1	1	0	1	0	-1	-1	-1	1200	0	3	1	0	1	0	1	1	0	1	1
81	0	1	0	-1	-1	0	1	-1	-1	-1	-1	-1	600	1	3	1	0	1	0	1	1	0	1	1
81	1	-1	-1	-1	-1	-1	-1	-1	-1	-1	-1	-1	600	0	3	1	0	1	0	1	1	0	1	1
82	0	-1	-1	1	0	0	1	-1	-1	1	0	0	1200	0	3	1	0	1	0	1	1	1	1	1
82	0	0	1	1	0	1	0	1	0	0	0	1	600	1	3	1	0	1	0	1	1	1	1	1
82	1	-1	-1	-1	-1	-1	-1	-1	-1	-1	-1	-1	600	0	3	1	0	1	0	1	1	1	1	1
82	0	1	0	-1	-1	0	1	1	0	0	1	0	3600	1	3	1	0	1	0	1	1	1	1	1
82	0	-1	-1	1	0	0	1	0	1	0	0	1	1800	0	3	1	0	1	0	1	1	1	1	1
82	1	-1	-1	-1	-1	-1	-1	-1	-1	-1	-1	-1	600	0	3	1	0	1	0	1	1	1	1	1
82	0	-1	-1	0	1	1	0	1	0	-1	-1	-1	1200	1	3	1	0	1	0	1	1	1	1	1
82	0	-1	-1	-1	-1	-1	-1	1	0	-1	-1	-1	1800	0	3	1	0	1	0	1	1	1	1	1
82	1	-1	-1	-1	-1	-1	-1	-1	-1	-1	-1	-1	600	0	3	1	0	1	0	1	1	1	1	1
83	0	-1	-1	1	0	0	1	-1	-1	1	0	0	1200	0	3	0	0	1	0	1	1	1	1	1
83	0	1	0	-1	-1	-1	-1	1	0	0	0	1	1200	1	3	0	0	1	0	1	1	1	1	1
83	1	-1	-1	-1	-1	-1	-1	-1	-1	-1	-1	-1	600	0	3	0	0	1	0	1	1	1	1	1
83	0	1	0	-1	-1	0	1	1	0	0	1	0	3600	1	3	0	0	1	0	1	1	1	1	1
83	0	1	0	1	0	-1	-1	1	0	1	0	0	2400	0	3	0	0	1	0	1	1	1	1	1
83	1	-1	-1	-1	-1	-1	-1	-1	-1	-1	-1	-1	600	0	3	0	0	1	0	1	1	1	1	1
83	0	0	1	1	0	1	0	1	0	0	0	1	600	0	3	0	0	1	0	1	1	1	1	1
83	0	1	0	-1	-1	-1	-1	1	0	0	0	1	1200	1	3	0	0	1	0	1	1	1	1	1
83	1	-1	-1	-1	-1	-1	-1	-1	-1	-1	-1	-1	600	0	3	0	0	1	0	1	1	1	1	1
84	0	-1	-1	1	0	0	1	-1	-1	1	0	0	1200	0	3	0	1	1	1	1	1	0	1	1
84	0	-1	-1	1	0	1	0	1	0	0	1	0	600	1	3	0	1	1	1	1	1	0	1	1
84	1	-1	-1	-1	-1	-1	-1	-1	-1	-1	-1	-1	600	0	3	0	1	1	1	1	1	0	1	1
84	0	1	0	-1	-1	0	1	1	0	0	1	0	3600	1	3	0	1	1	1	1	1	0	1	1
84	0	0	1	-1	-1	-1	-1	0	1	0	1	0	1200	0	3	0	1	1	1	1	1	0	1	1
84	1	-1	-1	-1	-1	-1	-1	-1	-1	-1	-1	-1	600	0	3	0	1	1	1	1	1	0	1	1
84	0	0	1	1	0	1	0	1	0	0	0	1	600	1	3	0	1	1	1	1	1	0	1	1
84	0	-1	-1	1	0	1	0	1	0	0	1	0	600	0	3	0	1	1	1	1	1	0	1	1
84	1	-1	-1	-1	-1	-1	-1	-1	-1	-1	-1	-1	600	0	3	0	1	1	1	1	1	0	1	1
85	0	-1	-1	1	0	0	1	-1	-1	1	0	0	1200	0	3	0	0	0	0	1	0	1	1	1
85	0	1	0	-1	-1	0	1	-1	-1	-1	-1	-1	600	0	3	0	0	0	0	1	0	1	1	1
85	1	-1	-1	-1	-1	-1	-1	-1	-1	-1	-1	-1	600	1	3	0	0	0	0	1	0	1	1	1
85	0	1	0	-1	-1	0	1	1	0	0	1	0	3600	1	3	0	0	0	0	1	0	1	1	1
85	0	0	1	1	0	-1	-1	-1	-1	-1	-1	-1	3600	0	3	0	0	0	0	1	0	1	1	1
85	1	-1	-1	-1	-1	-1	-1	-1	-1	-1	-1	-1	600	0	3	0	0	0	0	1	0	1	1	1
85	0	0	1	1	0	1	0	1	0	0	0	1	600	0	3	0	0	0	0	1	0	1	1	1
85	0	1	0	-1	-1	0	1	-1	-1	-1	-1	-1	600	0	3	0	0	0	0	1	0	1	1	1
85	1	-1	-1	-1	-1	-1	-1	-1	-1	-1	-1	-1	600	1	3	0	0	0	0	1	0	1	1	1
86	0	-1	-1	1	0	0	1	-1	-1	1	0	0	1200	1	3	0	1	1	1	1	1	0	1	1
86	0	-1	-1	-1	-1	-1	-1	1	0	-1	-1	-1	1800	0	3	0	1	1	1	1	1	0	1	1
86	1	-1	-1	-1	-1	-1	-1	-1	-1	-1	-1	-1	600	0	3	0	1	1	1	1	1	0	1	1
86	0	1	0	-1	-1	0	1	1	0	0	1	0	3600	0	3	0	1	1	1	1	1	0	1	1
86	0	1	0	1	0	1	0	0	1	-1	-1	-1	3600	0	3	0	1	1	1	1	1	0	1	1
86	1	-1	-1	-1	-1	-1	-1	-1	-1	-1	-1	-1	600	1	3	0	1	1	1	1	1	0	1	1
86	0	0	1	1	0	1	0	1	0	0	0	1	600	1	3	0	1	1	1	1	1	0	1	1
86	0	-1	-1	-1	-1	-1	-1	1	0	-1	-1	-1	1800	0	3	0	1	1	1	1	1	0	1	1
86	1	-1	-1	-1	-1	-1	-1	-1	-1	-1	-1	-1	600	0	3	0	1	1	1	1	1	0	1	1
87	0	-1	-1	-1	-1	1	0	1	0	1	0	0	3600	0	3	1	0	1	0	1	1	1	1	1
87	0	1	0	1	0	1	0	-1	-1	-1	-1	-1	1200	0	3	1	0	1	0	1	1	1	1	1
87	1	-1	-1	-1	-1	-1	-1	-1	-1	-1	-1	-1	600	1	3	1	0	1	0	1	1	1	1	1
87	0	1	0	-1	-1	0	1	1	0	0	1	0	3600	1	3	1	0	1	0	1	1	1	1	1
87	0	1	0	1	0	-1	-1	1	0	-1	-1	-1	1800	0	3	1	0	1	0	1	1	1	1	1
87	1	-1	-1	-1	-1	-1	-1	-1	-1	-1	-1	-1	600	0	3	1	0	1	0	1	1	1	1	1
87	0	1	0	-1	-1	-1	-1	1	0	0	0	1	1200	1	3	1	0	1	0	1	1	1	1	1
87	0	-1	-1	1	0	1	0	1	0	0	1	0	600	0	3	1	0	1	0	1	1	1	1	1
87	1	-1	-1	-1	-1	-1	-1	-1	-1	-1	-1	-1	600	0	3	1	0	1	0	1	1	1	1	1
88	0	-1	-1	-1	-1	1	0	1	0	1	0	0	3600	1	3	0	1	1	0	1	1	0	1	1
88	0	-1	-1	-1	-1	1	0	0	1	-1	-1	-1	2400	0	3	0	1	1	0	1	1	0	1	1
88	1	-1	-1	-1	-1	-1	-1	-1	-1	-1	-1	-1	600	0	3	0	1	1	0	1	1	0	1	1
88	0	1	0	-1	-1	0	1	1	0	0	1	0	3600	1	3	0	1	1	0	1	1	0	1	1
88	0	-1	-1	0	1	1	0	1	0	-1	-1	-1	1200	0	3	0	1	1	0	1	1	0	1	1
88	1	-1	-1	-1	-1	-1	-1	-1	-1	-1	-1	-1	600	0	3	0	1	1	0	1	1	0	1	1
88	0	1	0	-1	-1	-1	-1	1	0	0	0	1	1200	1	3	0	1	1	0	1	1	0	1	1
88	0	1	0	-1	-1	0	1	-1	-1	-1	-1	-1	600	0	3	0	1	1	0	1	1	0	1	1
88	1	-1	-1	-1	-1	-1	-1	-1	-1	-1	-1	-1	600	0	3	0	1	1	0	1	1	0	1	1
89	0	-1	-1	-1	-1	1	0	1	0	1	0	0	3600	0	3	1	0	1	0	1	0	0	1	1
89	0	1	0	0	1	1	0	-1	-1	0	1	0	1800	0	3	1	0	1	0	1	0	0	1	1
89	1	-1	-1	-1	-1	-1	-1	-1	-1	-1	-1	-1	600	1	3	1	0	1	0	1	0	0	1	1
89	0	1	0	-1	-1	0	1	1	0	0	1	0	3600	1	3	1	0	1	0	1	0	0	1	1
89	0	0	1	1	0	1	0	1	0	0	0	1	600	0	3	1	0	1	0	1	0	0	1	1
89	1	-1	-1	-1	-1	-1	-1	-1	-1	-1	-1	-1	600	0	3	1	0	1	0	1	0	0	1	1
89	0	1	0	-1	-1	-1	-1	1	0	0	0	1	1200	1	3	1	0	1	0	1	0	0	1	1
89	0	-1	-1	-1	-1	-1	-1	1	0	-1	-1	-1	1800	0	3	1	0	1	0	1	0	0	1	1
89	1	-1	-1	-1	-1	-1	-1	-1	-1	-1	-1	-1	600	0	3	1	0	1	0	1	0	0	1	1
90	0	-1	-1	-1	-1	1	0	1	0	1	0	0	3600	0	3	1	0	0	1	1	1	1	1	1
90	0	1	0	-1	-1	1	0	-1	-1	0	0	1	2400	0	3	1	0	0	1	1	1	1	1	1
90	1	-1	-1	-1	-1	-1	-1	-1	-1	-1	-1	-1	600	1	3	1	0	0	1	1	1	1	1	1
90	0	1	0	-1	-1	0	1	1	0	0	1	0	3600	0	3	1	0	0	1	1	1	1	1	1
90	0	1	0	-1	-1	-1	-1	1	0	0	0	1	1200	0	3	1	0	0	1	1	1	1	1	1
90	1	-1	-1	-1	-1	-1	-1	-1	-1	-1	-1	-1	600	1	3	1	0	0	1	1	1	1	1	1
90	0	-1	-1	1	0	1	0	1	0	0	1	0	600	0	3	1	0	0	1	1	1	1	1	1
90	0	1	0	-1	-1	0	1	-1	-1	-1	-1	-1	600	0	3	1	0	0	1	1	1	1	1	1
90	1	-1	-1	-1	-1	-1	-1	-1	-1	-1	-1	-1	600	1	3	1	0	0	1	1	1	1	1	1
91	0	-1	-1	-1	-1	1	0	1	0	1	0	0	3600	0	3	1	0	1	0	1	1	0	1	1
91	0	1	0	-1	-1	0	1	1	0	0	1	0	3600	0	3	1	0	1	0	1	1	0	1	1
91	1	-1	-1	-1	-1	-1	-1	-1	-1	-1	-1	-1	600	1	3	1	0	1	0	1	1	0	1	1
91	0	1	0	-1	-1	0	1	1	0	0	1	0	3600	1	3	1	0	1	0	1	1	0	1	1
91	0	-1	-1	1	0	1	0	1	0	0	1	0	600	0	3	1	0	1	0	1	1	0	1	1
91	1	-1	-1	-1	-1	-1	-1	-1	-1	-1	-1	-1	600	0	3	1	0	1	0	1	1	0	1	1
91	0	-1	-1	1	0	1	0	1	0	0	1	0	600	1	3	1	0	1	0	1	1	0	1	1
91	0	-1	-1	-1	-1	-1	-1	1	0	-1	-1	-1	1800	0	3	1	0	1	0	1	1	0	1	1
91	1	-1	-1	-1	-1	-1	-1	-1	-1	-1	-1	-1	600	0	3	1	0	1	0	1	1	0	1	1
92	0	-1	-1	-1	-1	1	0	1	0	1	0	0	3600	0	3	1	0	1	0	1	1	1	1	1
92	0	1	0	0	1	-1	-1	0	1	1	0	0	600	1	3	1	0	1	0	1	1	1	1	1
92	1	-1	-1	-1	-1	-1	-1	-1	-1	-1	-1	-1	600	0	3	1	0	1	0	1	1	1	1	1
92	0	1	0	-1	-1	0	1	1	0	0	1	0	3600	0	3	1	0	1	0	1	1	1	1	1
92	0	1	0	-1	-1	0	1	-1	-1	-1	-1	-1	600	1	3	1	0	1	0	1	1	1	1	1
92	1	-1	-1	-1	-1	-1	-1	-1	-1	-1	-1	-1	600	0	3	1	0	1	0	1	1	1	1	1
92	0	1	0	-1	-1	0	1	-1	-1	-1	-1	-1	600	1	3	1	0	1	0	1	1	1	1	1
92	0	-1	-1	-1	-1	-1	-1	1	0	-1	-1	-1	1800	0	3	1	0	1	0	1	1	1	1	1
92	1	-1	-1	-1	-1	-1	-1	-1	-1	-1	-1	-1	600	0	3	1	0	1	0	1	1	1	1	1
93	0	-1	-1	0	1	-1	-1	-1	-1	0	0	1	3600	0	3	0	0	1	0	1	1	1	1	1
93	0	-1	-1	1	0	-1	-1	-1	-1	0	1	0	2400	1	3	0	0	1	0	1	1	1	1	1
93	1	-1	-1	-1	-1	-1	-1	-1	-1	-1	-1	-1	600	0	3	0	0	1	0	1	1	1	1	1
93	0	-1	-1	-1	-1	1	0	1	0	1	0	0	3600	0	3	0	0	1	0	1	1	1	1	1
93	0	0	1	-1	-1	1	0	-1	-1	1	0	0	1800	1	3	0	0	1	0	1	1	1	1	1
93	1	-1	-1	-1	-1	-1	-1	-1	-1	-1	-1	-1	600	0	3	0	0	1	0	1	1	1	1	1
93	0	1	0	-1	-1	0	1	1	0	0	1	0	3600	0	3	0	0	1	0	1	1	1	1	1
93	0	-1	-1	-1	-1	-1	-1	1	0	-1	-1	-1	1800	1	3	0	0	1	0	1	1	1	1	1
93	1	-1	-1	-1	-1	-1	-1	-1	-1	-1	-1	-1	600	0	3	0	0	1	0	1	1	1	1	1
94	0	-1	-1	0	1	-1	-1	-1	-1	0	0	1	3600	0	3	0	0	1	0	1	0	0	1	1
94	0	0	1	0	1	0	1	1	0	-1	-1	-1	2400	1	3	0	0	1	0	1	0	0	1	1
94	1	-1	-1	-1	-1	-1	-1	-1	-1	-1	-1	-1	600	0	3	0	0	1	0	1	0	0	1	1
94	0	-1	-1	-1	-1	1	0	1	0	1	0	0	3600	0	3	0	0	1	0	1	0	0	1	1
94	0	-1	-1	1	0	0	1	0	1	0	0	1	1800	1	3	0	0	1	0	1	0	0	1	1
94	1	-1	-1	-1	-1	-1	-1	-1	-1	-1	-1	-1	600	0	3	0	0	1	0	1	0	0	1	1
94	0	1	0	0	1	-1	-1	0	1	1	0	0	600	1	3	0	0	1	0	1	0	0	1	1
94	0	0	1	-1	-1	1	0	-1	-1	1	0	0	1800	0	3	0	0	1	0	1	0	0	1	1
94	1	-1	-1	-1	-1	-1	-1	-1	-1	-1	-1	-1	600	0	3	0	0	1	0	1	0	0	1	1
95	0	-1	-1	0	1	-1	-1	-1	-1	0	0	1	3600	1	3	1	0	0	0	1	0	1	1	1
95	0	-1	-1	1	0	0	1	-1	-1	1	0	0	1200	0	3	1	0	0	0	1	0	1	1	1
95	1	-1	-1	-1	-1	-1	-1	-1	-1	-1	-1	-1	600	0	3	1	0	0	0	1	0	1	1	1
95	0	-1	-1	-1	-1	1	0	1	0	1	0	0	3600	0	3	1	0	0	0	1	0	1	1	1
95	0	1	0	1	0	-1	-1	1	0	1	0	0	2400	1	3	1	0	0	0	1	0	1	1	1
95	1	-1	-1	-1	-1	-1	-1	-1	-1	-1	-1	-1	600	0	3	1	0	0	0	1	0	1	1	1
95	0	1	0	0	1	-1	-1	0	1	1	0	0	600	0	3	1	0	0	0	1	0	1	1	1
95	0	-1	-1	1	0	0	1	0	1	0	0	1	1800	1	3	1	0	0	0	1	0	1	1	1
95	1	-1	-1	-1	-1	-1	-1	-1	-1	-1	-1	-1	600	0	3	1	0	0	0	1	0	1	1	1
96	0	-1	-1	0	1	-1	-1	-1	-1	0	0	1	3600	1	3	1	0	1	0	1	1	0	1	1
96	0	-1	-1	-1	-1	1	0	1	0	1	0	0	3600	0	3	1	0	1	0	1	1	0	1	1
96	1	-1	-1	-1	-1	-1	-1	-1	-1	-1	-1	-1	600	0	3	1	0	1	0	1	1	0	1	1
96	0	-1	-1	-1	-1	1	0	1	0	1	0	0	3600	0	3	1	0	1	0	1	1	0	1	1
96	0	0	1	-1	-1	-1	-1	0	1	0	1	0	1200	1	3	1	0	1	0	1	1	0	1	1
96	1	-1	-1	-1	-1	-1	-1	-1	-1	-1	-1	-1	600	0	3	1	0	1	0	1	1	0	1	1
96	0	1	0	0	1	-1	-1	0	1	1	0	0	600	1	3	1	0	1	0	1	1	0	1	1
96	0	1	0	1	0	-1	-1	1	0	1	0	0	2400	0	3	1	0	1	0	1	1	0	1	1
96	1	-1	-1	-1	-1	-1	-1	-1	-1	-1	-1	-1	600	0	3	1	0	1	0	1	1	0	1	1
97	0	-1	-1	0	1	-1	-1	-1	-1	0	0	1	3600	0	3	1	0	1	0	1	1	0	1	1
97	0	1	0	1	0	1	0	-1	-1	-1	-1	-1	1200	1	3	1	0	1	0	1	1	0	1	1
97	1	-1	-1	-1	-1	-1	-1	-1	-1	-1	-1	-1	600	0	3	1	0	1	0	1	1	0	1	1
97	0	-1	-1	-1	-1	1	0	1	0	1	0	0	3600	0	3	1	0	1	0	1	1	0	1	1
97	0	0	1	1	0	-1	-1	-1	-1	-1	-1	-1	3600	0	3	1	0	1	0	1	1	0	1	1
97	1	-1	-1	-1	-1	-1	-1	-1	-1	-1	-1	-1	600	1	3	1	0	1	0	1	1	0	1	1
97	0	1	0	0	1	-1	-1	0	1	1	0	0	600	0	3	1	0	1	0	1	1	0	1	1
97	0	0	1	-1	-1	-1	-1	0	1	0	1	0	1200	1	3	1	0	1	0	1	1	0	1	1
97	1	-1	-1	-1	-1	-1	-1	-1	-1	-1	-1	-1	600	0	3	1	0	1	0	1	1	0	1	1
98	0	-1	-1	0	1	-1	-1	-1	-1	0	0	1	3600	0	3	1	1	1	1	1	0	0	1	1
98	0	-1	-1	-1	-1	1	0	0	1	-1	-1	-1	2400	1	3	1	1	1	1	1	0	0	1	1
98	1	-1	-1	-1	-1	-1	-1	-1	-1	-1	-1	-1	600	0	3	1	1	1	1	1	0	0	1	1
98	0	-1	-1	-1	-1	1	0	1	0	1	0	0	3600	0	3	1	1	1	1	1	0	0	1	1
98	0	1	0	1	0	1	0	0	1	-1	-1	-1	3600	1	3	1	1	1	1	1	0	0	1	1
98	1	-1	-1	-1	-1	-1	-1	-1	-1	-1	-1	-1	600	0	3	1	1	1	1	1	0	0	1	1
98	0	1	0	0	1	-1	-1	0	1	1	0	0	600	0	3	1	1	1	1	1	0	0	1	1
98	0	0	1	1	0	-1	-1	-1	-1	-1	-1	-1	3600	1	3	1	1	1	1	1	0	0	1	1
98	1	-1	-1	-1	-1	-1	-1	-1	-1	-1	-1	-1	600	0	3	1	1	1	1	1	0	0	1	1
99	0	-1	-1	0	1	-1	-1	-1	-1	0	0	1	3600	1	3	1	0	1	0	1	0	0	1	1
99	0	1	0	0	1	1	0	-1	-1	0	1	0	1800	0	3	1	0	1	0	1	0	0	1	1
99	1	-1	-1	-1	-1	-1	-1	-1	-1	-1	-1	-1	600	0	3	1	0	1	0	1	0	0	1	1
99	0	-1	-1	-1	-1	1	0	1	0	1	0	0	3600	0	3	1	0	1	0	1	0	0	1	1
99	0	1	0	1	0	-1	-1	1	0	-1	-1	-1	1800	1	3	1	0	1	0	1	0	0	1	1
99	1	-1	-1	-1	-1	-1	-1	-1	-1	-1	-1	-1	600	0	3	1	0	1	0	1	0	0	1	1
99	0	1	0	0	1	-1	-1	0	1	1	0	0	600	1	3	1	0	1	0	1	0	0	1	1
99	0	1	0	1	0	1	0	0	1	-1	-1	-1	3600	0	3	1	0	1	0	1	0	0	1	1
99	1	-1	-1	-1	-1	-1	-1	-1	-1	-1	-1	-1	600	0	3	1	0	1	0	1	0	0	1	1
100	0	-1	-1	0	1	-1	-1	-1	-1	0	0	1	3600	1	3	1	0	0	0	1	0	1	1	1
100	0	1	0	-1	-1	1	0	-1	-1	0	0	1	2400	0	3	1	0	0	0	1	0	1	1	1
100	1	-1	-1	-1	-1	-1	-1	-1	-1	-1	-1	-1	600	0	3	1	0	0	0	1	0	1	1	1
100	0	-1	-1	-1	-1	1	0	1	0	1	0	0	3600	0	3	1	0	0	0	1	0	1	1	1
100	0	-1	-1	0	1	1	0	1	0	-1	-1	-1	1200	1	3	1	0	0	0	1	0	1	1	1
100	1	-1	-1	-1	-1	-1	-1	-1	-1	-1	-1	-1	600	0	3	1	0	0	0	1	0	1	1	1
100	0	1	0	0	1	-1	-1	0	1	1	0	0	600	1	3	1	0	0	0	1	0	1	1	1
100	0	1	0	1	0	-1	-1	1	0	-1	-1	-1	1800	0	3	1	0	0	0	1	0	1	1	1
100	1	-1	-1	-1	-1	-1	-1	-1	-1	-1	-1	-1	600	0	3	1	0	0	0	1	0	1	1	1
101	0	-1	-1	0	1	-1	-1	-1	-1	0	0	1	3600	0	3	1	0	0	0	1	0	1	1	1
101	0	1	0	-1	-1	0	1	1	0	0	1	0	3600	1	3	1	0	0	0	1	0	1	1	1
101	1	-1	-1	-1	-1	-1	-1	-1	-1	-1	-1	-1	600	0	3	1	0	0	0	1	0	1	1	1
101	0	-1	-1	-1	-1	1	0	1	0	1	0	0	3600	0	3	1	0	0	0	1	0	1	1	1
101	0	0	1	1	0	1	0	1	0	0	0	1	600	1	3	1	0	0	0	1	0	1	1	1
101	1	-1	-1	-1	-1	-1	-1	-1	-1	-1	-1	-1	600	0	3	1	0	0	0	1	0	1	1	1
101	0	1	0	0	1	-1	-1	0	1	1	0	0	600	1	3	1	0	0	0	1	0	1	1	1
101	0	-1	-1	0	1	1	0	1	0	-1	-1	-1	1200	0	3	1	0	0	0	1	0	1	1	1
101	1	-1	-1	-1	-1	-1	-1	-1	-1	-1	-1	-1	600	0	3	1	0	0	0	1	0	1	1	1
102	0	-1	-1	0	1	-1	-1	-1	-1	0	0	1	3600	0	3	1	0	1	0	1	1	0	1	1
102	0	1	0	0	1	-1	-1	0	1	1	0	0	600	0	3	1	0	1	0	1	1	0	1	1
102	1	-1	-1	-1	-1	-1	-1	-1	-1	-1	-1	-1	600	1	3	1	0	1	0	1	1	0	1	1
102	0	-1	-1	-1	-1	1	0	1	0	1	0	0	3600	0	3	1	0	1	0	1	1	0	1	1
102	0	1	0	-1	-1	-1	-1	1	0	0	0	1	1200	1	3	1	0	1	0	1	1	0	1	1
102	1	-1	-1	-1	-1	-1	-1	-1	-1	-1	-1	-1	600	0	3	1	0	1	0	1	1	0	1	1
102	0	1	0	0	1	-1	-1	0	1	1	0	0	600	1	3	1	0	1	0	1	1	0	1	1
102	0	0	1	1	0	1	0	1	0	0	0	1	600	0	3	1	0	1	0	1	1	0	1	1
102	1	-1	-1	-1	-1	-1	-1	-1	-1	-1	-1	-1	600	0	3	1	0	1	0	1	1	0	1	1
103	0	-1	-1	0	1	-1	-1	-1	-1	0	0	1	3600	1	3	1	0	0	0	1	0	1	1	1
103	0	0	1	-1	-1	1	0	-1	-1	1	0	0	1800	0	3	1	0	0	0	1	0	1	1	1
103	1	-1	-1	-1	-1	-1	-1	-1	-1	-1	-1	-1	600	0	3	1	0	0	0	1	0	1	1	1
103	0	-1	-1	-1	-1	1	0	1	0	1	0	0	3600	0	3	1	0	0	0	1	0	1	1	1
103	0	-1	-1	1	0	1	0	1	0	0	1	0	600	1	3	1	0	0	0	1	0	1	1	1
103	1	-1	-1	-1	-1	-1	-1	-1	-1	-1	-1	-1	600	0	3	1	0	0	0	1	0	1	1	1
103	0	1	0	0	1	-1	-1	0	1	1	0	0	600	1	3	1	0	0	0	1	0	1	1	1
103	0	1	0	-1	-1	-1	-1	1	0	0	0	1	1200	0	3	1	0	0	0	1	0	1	1	1
103	1	-1	-1	-1	-1	-1	-1	-1	-1	-1	-1	-1	600	0	3	1	0	0	0	1	0	1	1	1
104	0	-1	-1	0	1	-1	-1	-1	-1	0	0	1	3600	0	3	1	0	1	0	1	1	0	1	0
104	0	-1	-1	1	0	0	1	0	1	0	0	1	1800	1	3	1	0	1	0	1	1	0	1	0
104	1	-1	-1	-1	-1	-1	-1	-1	-1	-1	-1	-1	600	0	3	1	0	1	0	1	1	0	1	0
104	0	-1	-1	-1	-1	1	0	1	0	1	0	0	3600	0	3	1	0	1	0	1	1	0	1	0
104	0	1	0	-1	-1	0	1	-1	-1	-1	-1	-1	600	1	3	1	0	1	0	1	1	0	1	0
104	1	-1	-1	-1	-1	-1	-1	-1	-1	-1	-1	-1	600	0	3	1	0	1	0	1	1	0	1	0
104	0	1	0	0	1	-1	-1	0	1	1	0	0	600	0	3	1	0	1	0	1	1	0	1	0
104	0	-1	-1	1	0	1	0	1	0	0	1	0	600	1	3	1	0	1	0	1	1	0	1	0
104	1	-1	-1	-1	-1	-1	-1	-1	-1	-1	-1	-1	600	0	3	1	0	1	0	1	1	0	1	0
105	0	-1	-1	0	1	-1	-1	-1	-1	0	0	1	3600	0	3	1	0	1	1	1	1	0	1	1
105	0	1	0	1	0	-1	-1	1	0	1	0	0	2400	0	3	1	0	1	1	1	1	0	1	1
105	1	-1	-1	-1	-1	-1	-1	-1	-1	-1	-1	-1	600	1	3	1	0	1	1	1	1	0	1	1
105	0	-1	-1	-1	-1	1	0	1	0	1	0	0	3600	0	3	1	0	1	1	1	1	0	1	1
105	0	-1	-1	-1	-1	-1	-1	1	0	-1	-1	-1	1800	1	3	1	0	1	1	1	1	0	1	1
105	1	-1	-1	-1	-1	-1	-1	-1	-1	-1	-1	-1	600	0	3	1	0	1	1	1	1	0	1	1
105	0	1	0	0	1	-1	-1	0	1	1	0	0	600	1	3	1	0	1	1	1	1	0	1	1
105	0	1	0	-1	-1	0	1	-1	-1	-1	-1	-1	600	0	3	1	0	1	1	1	1	0	1	1
105	1	-1	-1	-1	-1	-1	-1	-1	-1	-1	-1	-1	600	0	3	1	0	1	1	1	1	0	1	1
106	0	-1	-1	0	1	-1	-1	-1	-1	0	0	1	3600	0	3	1	0	1	0	1	1	0	1	1
106	0	0	1	-1	-1	-1	-1	0	1	0	1	0	1200	1	3	1	0	1	0	1	1	0	1	1
106	1	-1	-1	-1	-1	-1	-1	-1	-1	-1	-1	-1	600	0	3	1	0	1	0	1	1	0	1	1
106	0	1	0	1	0	1	0	-1	-1	-1	-1	-1	1200	0	3	1	0	1	0	1	1	0	1	1
106	0	-1	-1	-1	-1	1	0	0	1	-1	-1	-1	2400	1	3	1	0	1	0	1	1	0	1	1
106	1	-1	-1	-1	-1	-1	-1	-1	-1	-1	-1	-1	600	0	3	1	0	1	0	1	1	0	1	1
106	0	1	0	0	1	-1	-1	0	1	1	0	0	600	0	3	1	0	1	0	1	1	0	1	1
106	0	-1	-1	-1	-1	-1	-1	1	0	-1	-1	-1	1800	1	3	1	0	1	0	1	1	0	1	1
106	1	-1	-1	-1	-1	-1	-1	-1	-1	-1	-1	-1	600	0	3	1	0	1	0	1	1	0	1	1
107	0	-1	-1	0	1	-1	-1	-1	-1	0	0	1	3600	1	3	1	0	1	0	1	0	0	1	1
107	0	0	1	1	0	-1	-1	-1	-1	-1	-1	-1	3600	0	3	1	0	1	0	1	0	0	1	1
107	1	-1	-1	-1	-1	-1	-1	-1	-1	-1	-1	-1	600	0	3	1	0	1	0	1	0	0	1	1
107	0	1	0	1	0	1	0	-1	-1	-1	-1	-1	1200	0	3	1	0	1	0	1	0	0	1	1
107	0	1	0	0	1	1	0	-1	-1	0	1	0	1800	1	3	1	0	1	0	1	0	0	1	1
107	1	-1	-1	-1	-1	-1	-1	-1	-1	-1	-1	-1	600	0	3	1	0	1	0	1	0	0	1	1
107	0	0	1	-1	-1	1	0	-1	-1	1	0	0	1800	0	3	1	0	1	0	1	0	0	1	1
107	0	-1	-1	1	0	0	1	0	1	0	0	1	1800	1	3	1	0	1	0	1	0	0	1	1
107	1	-1	-1	-1	-1	-1	-1	-1	-1	-1	-1	-1	600	0	3	1	0	1	0	1	0	0	1	1
108	0	-1	-1	0	1	-1	-1	-1	-1	0	0	1	3600	0	3	1	0	0	0	1	1	0	1	1
108	0	1	0	1	0	1	0	0	1	-1	-1	-1	3600	0	3	1	0	0	0	1	1	0	1	1
108	1	-1	-1	-1	-1	-1	-1	-1	-1	-1	-1	-1	600	1	3	1	0	0	0	1	1	0	1	1
108	0	1	0	1	0	1	0	-1	-1	-1	-1	-1	1200	0	3	1	0	0	0	1	1	0	1	1
108	0	1	0	-1	-1	1	0	-1	-1	0	0	1	2400	0	3	1	0	0	0	1	1	0	1	1
108	1	-1	-1	-1	-1	-1	-1	-1	-1	-1	-1	-1	600	1	3	1	0	0	0	1	1	0	1	1
108	0	0	1	-1	-1	1	0	-1	-1	1	0	0	1800	0	3	1	0	0	0	1	1	0	1	1
108	0	1	0	1	0	-1	-1	1	0	1	0	0	2400	0	3	1	0	0	0	1	1	0	1	1
108	1	-1	-1	-1	-1	-1	-1	-1	-1	-1	-1	-1	600	1	3	1	0	0	0	1	1	0	1	1
109	0	-1	-1	0	1	-1	-1	-1	-1	0	0	1	3600	1	3	1	1	1	1	1	0	0	1	1
109	0	1	0	1	0	-1	-1	1	0	-1	-1	-1	1800	0	3	1	1	1	1	1	0	0	1	1
109	1	-1	-1	-1	-1	-1	-1	-1	-1	-1	-1	-1	600	0	3	1	1	1	1	1	0	0	1	1
109	0	1	0	1	0	1	0	-1	-1	-1	-1	-1	1200	1	3	1	1	1	1	1	0	0	1	1
109	0	1	0	-1	-1	0	1	1	0	0	1	0	3600	0	3	1	1	1	1	1	0	0	1	1
109	1	-1	-1	-1	-1	-1	-1	-1	-1	-1	-1	-1	600	0	3	1	1	1	1	1	0	0	1	1
109	0	0	1	-1	-1	1	0	-1	-1	1	0	0	1800	0	3	1	1	1	1	1	0	0	1	1
109	0	0	1	-1	-1	-1	-1	0	1	0	1	0	1200	0	3	1	1	1	1	1	0	0	1	1
109	1	-1	-1	-1	-1	-1	-1	-1	-1	-1	-1	-1	600	1	3	1	1	1	1	1	0	0	1	1
110	0	-1	-1	0	1	-1	-1	-1	-1	0	0	1	3600	0	3	1	1	1	0	1	0	1	1	1
110	0	-1	-1	0	1	1	0	1	0	-1	-1	-1	1200	1	3	1	1	1	0	1	0	1	1	1
110	1	-1	-1	-1	-1	-1	-1	-1	-1	-1	-1	-1	600	0	3	1	1	1	0	1	0	1	1	1
110	0	1	0	1	0	1	0	-1	-1	-1	-1	-1	1200	0	3	1	1	1	0	1	0	1	1	1
110	0	1	0	0	1	-1	-1	0	1	1	0	0	600	1	3	1	1	1	0	1	0	1	1	1
110	1	-1	-1	-1	-1	-1	-1	-1	-1	-1	-1	-1	600	0	3	1	1	1	0	1	0	1	1	1
110	0	0	1	-1	-1	1	0	-1	-1	1	0	0	1800	0	3	1	1	1	0	1	0	1	1	1
110	0	0	1	1	0	-1	-1	-1	-1	-1	-1	-1	3600	0	3	1	1	1	0	1	0	1	1	1
110	1	-1	-1	-1	-1	-1	-1	-1	-1	-1	-1	-1	600	1	3	1	1	1	0	1	0	1	1	1
111	0	-1	-1	0	1	-1	-1	-1	-1	0	0	1	3600	1	3	1	0	1	0	1	1	0	1	1
111	0	0	1	1	0	1	0	1	0	0	0	1	600	0	3	1	0	1	0	1	1	0	1	1
111	1	-1	-1	-1	-1	-1	-1	-1	-1	-1	-1	-1	600	0	3	1	0	1	0	1	1	0	1	1
111	0	1	0	1	0	1	0	-1	-1	-1	-1	-1	1200	0	3	1	0	1	0	1	1	0	1	1
111	0	0	1	-1	-1	1	0	-1	-1	1	0	0	1800	1	3	1	0	1	0	1	1	0	1	1
111	1	-1	-1	-1	-1	-1	-1	-1	-1	-1	-1	-1	600	0	3	1	0	1	0	1	1	0	1	1
111	0	0	1	-1	-1	1	0	-1	-1	1	0	0	1800	0	3	1	0	1	0	1	1	0	1	1
111	0	1	0	1	0	1	0	0	1	-1	-1	-1	3600	1	3	1	0	1	0	1	1	0	1	1
111	1	-1	-1	-1	-1	-1	-1	-1	-1	-1	-1	-1	600	0	3	1	0	1	0	1	1	0	1	1
112	0	-1	-1	0	1	-1	-1	-1	-1	0	0	1	3600	0	3	1	0	0	0	1	1	0	1	1
112	0	1	0	-1	-1	-1	-1	1	0	0	0	1	1200	1	3	1	0	0	0	1	1	0	1	1
112	1	-1	-1	-1	-1	-1	-1	-1	-1	-1	-1	-1	600	0	3	1	0	0	0	1	1	0	1	1
112	0	1	0	1	0	1	0	-1	-1	-1	-1	-1	1200	0	3	1	0	0	0	1	1	0	1	1
112	0	-1	-1	1	0	0	1	0	1	0	0	1	1800	1	3	1	0	0	0	1	1	0	1	1
112	1	-1	-1	-1	-1	-1	-1	-1	-1	-1	-1	-1	600	0	3	1	0	0	0	1	1	0	1	1
112	0	0	1	-1	-1	1	0	-1	-1	1	0	0	1800	0	3	1	0	0	0	1	1	0	1	1
112	0	1	0	1	0	-1	-1	1	0	-1	-1	-1	1800	1	3	1	0	0	0	1	1	0	1	1
112	1	-1	-1	-1	-1	-1	-1	-1	-1	-1	-1	-1	600	0	3	1	0	0	0	1	1	0	1	1
113	0	-1	-1	0	1	-1	-1	-1	-1	0	0	1	3600	0	3	1	0	0	0	1	1	0	1	0
113	0	-1	-1	1	0	1	0	1	0	0	1	0	600	1	3	1	0	0	0	1	1	0	1	0
113	1	-1	-1	-1	-1	-1	-1	-1	-1	-1	-1	-1	600	0	3	1	0	0	0	1	1	0	1	0
113	0	1	0	1	0	1	0	-1	-1	-1	-1	-1	1200	1	3	1	0	0	0	1	1	0	1	0
113	0	1	0	1	0	-1	-1	1	0	1	0	0	2400	0	3	1	0	0	0	1	1	0	1	0
113	1	-1	-1	-1	-1	-1	-1	-1	-1	-1	-1	-1	600	0	3	1	0	0	0	1	1	0	1	0
113	0	0	1	-1	-1	1	0	-1	-1	1	0	0	1800	0	3	1	0	0	0	1	1	0	1	0
113	0	-1	-1	0	1	1	0	1	0	-1	-1	-1	1200	1	3	1	0	0	0	1	1	0	1	0
113	1	-1	-1	-1	-1	-1	-1	-1	-1	-1	-1	-1	600	0	3	1	0	0	0	1	1	0	1	0
114	0	-1	-1	0	1	-1	-1	-1	-1	0	0	1	3600	0	3	1	0	1	0	1	1	0	1	0
114	0	1	0	-1	-1	0	1	-1	-1	-1	-1	-1	600	0	3	1	0	1	0	1	1	0	1	0
114	1	-1	-1	-1	-1	-1	-1	-1	-1	-1	-1	-1	600	1	3	1	0	1	0	1	1	0	1	0
114	0	1	0	1	0	1	0	-1	-1	-1	-1	-1	1200	0	3	1	0	1	0	1	1	0	1	0
114	0	0	1	-1	-1	-1	-1	0	1	0	1	0	1200	0	3	1	0	1	0	1	1	0	1	0
114	1	-1	-1	-1	-1	-1	-1	-1	-1	-1	-1	-1	600	1	3	1	0	1	0	1	1	0	1	0
114	0	0	1	-1	-1	1	0	-1	-1	1	0	0	1800	0	3	1	0	1	0	1	1	0	1	0
114	0	0	1	1	0	1	0	1	0	0	0	1	600	0	3	1	0	1	0	1	1	0	1	0
114	1	-1	-1	-1	-1	-1	-1	-1	-1	-1	-1	-1	600	1	3	1	0	1	0	1	1	0	1	0
115	0	-1	-1	0	1	-1	-1	-1	-1	0	0	1	3600	0	3	1	0	0	0	1	1	0	1	1
115	0	-1	-1	-1	-1	-1	-1	1	0	-1	-1	-1	1800	1	3	1	0	0	0	1	1	0	1	1
115	1	-1	-1	-1	-1	-1	-1	-1	-1	-1	-1	-1	600	0	3	1	0	0	0	1	1	0	1	1
115	0	1	0	1	0	1	0	-1	-1	-1	-1	-1	1200	1	3	1	0	0	0	1	1	0	1	1
115	0	0	1	1	0	-1	-1	-1	-1	-1	-1	-1	3600	0	3	1	0	0	0	1	1	0	1	1
115	1	-1	-1	-1	-1	-1	-1	-1	-1	-1	-1	-1	600	0	3	1	0	0	0	1	1	0	1	1
115	0	0	1	-1	-1	1	0	-1	-1	1	0	0	1800	0	3	1	0	0	0	1	1	0	1	1
115	0	1	0	-1	-1	-1	-1	1	0	0	0	1	1200	1	3	1	0	0	0	1	1	0	1	1
115	1	-1	-1	-1	-1	-1	-1	-1	-1	-1	-1	-1	600	0	3	1	0	0	0	1	1	0	1	1
116	0	-1	-1	1	0	-1	-1	-1	-1	0	1	0	2400	0	3	1	0	1	0	1	1	0	1	1
116	0	0	1	0	1	0	1	1	0	-1	-1	-1	2400	1	3	1	0	1	0	1	1	0	1	1
116	1	-1	-1	-1	-1	-1	-1	-1	-1	-1	-1	-1	600	0	3	1	0	1	0	1	1	0	1	1
116	0	1	0	1	0	1	0	-1	-1	-1	-1	-1	1200	0	3	1	0	1	0	1	1	0	1	1
116	0	1	0	1	0	1	0	0	1	-1	-1	-1	3600	1	3	1	0	1	0	1	1	0	1	1
116	1	-1	-1	-1	-1	-1	-1	-1	-1	-1	-1	-1	600	0	3	1	0	1	0	1	1	0	1	1
116	0	0	1	-1	-1	1	0	-1	-1	1	0	0	1800	0	3	1	0	1	0	1	1	0	1	1
116	0	-1	-1	1	0	1	0	1	0	0	1	0	600	1	3	1	0	1	0	1	1	0	1	1
116	1	-1	-1	-1	-1	-1	-1	-1	-1	-1	-1	-1	600	0	3	1	0	1	0	1	1	0	1	1
117	0	-1	-1	1	0	-1	-1	-1	-1	0	1	0	2400	0	3	1	1	1	0	1	1	0	1	1
117	0	-1	-1	1	0	0	1	-1	-1	1	0	0	1200	1	3	1	1	1	0	1	1	0	1	1
117	1	-1	-1	-1	-1	-1	-1	-1	-1	-1	-1	-1	600	0	3	1	1	1	0	1	1	0	1	1
117	0	1	0	1	0	1	0	-1	-1	-1	-1	-1	1200	1	3	1	1	1	0	1	1	0	1	1
117	0	1	0	1	0	-1	-1	1	0	-1	-1	-1	1800	0	3	1	1	1	0	1	1	0	1	1
117	1	-1	-1	-1	-1	-1	-1	-1	-1	-1	-1	-1	600	0	3	1	1	1	0	1	1	0	1	1
117	0	0	1	-1	-1	1	0	-1	-1	1	0	0	1800	1	3	1	1	1	0	1	1	0	1	1
117	0	1	0	-1	-1	0	1	-1	-1	-1	-1	-1	600	0	3	1	1	1	0	1	1	0	1	1
117	1	-1	-1	-1	-1	-1	-1	-1	-1	-1	-1	-1	600	0	3	1	1	1	0	1	1	0	1	1
118	0	-1	-1	1	0	-1	-1	-1	-1	0	1	0	2400	0	3	1	0	1	1	1	0	0	1	0
118	0	-1	-1	-1	-1	1	0	1	0	1	0	0	3600	0	3	1	0	1	1	1	0	0	1	0
118	1	-1	-1	-1	-1	-1	-1	-1	-1	-1	-1	-1	600	1	3	1	0	1	1	1	0	0	1	0
118	0	1	0	1	0	1	0	-1	-1	-1	-1	-1	1200	0	3	1	0	1	1	1	0	0	1	0
118	0	-1	-1	0	1	1	0	1	0	-1	-1	-1	1200	1	3	1	0	1	1	1	0	0	1	0
118	1	-1	-1	-1	-1	-1	-1	-1	-1	-1	-1	-1	600	0	3	1	0	1	1	1	0	0	1	0
118	0	0	1	-1	-1	1	0	-1	-1	1	0	0	1800	0	3	1	0	1	1	1	0	0	1	0
118	0	-1	-1	-1	-1	-1	-1	1	0	-1	-1	-1	1800	1	3	1	0	1	1	1	0	0	1	0
118	1	-1	-1	-1	-1	-1	-1	-1	-1	-1	-1	-1	600	0	3	1	0	1	1	1	0	0	1	0
119	0	-1	-1	1	0	-1	-1	-1	-1	0	1	0	2400	0	3	1	1	1	0	1	0	0	1	0
119	0	1	0	1	0	1	0	-1	-1	-1	-1	-1	1200	1	3	1	1	1	0	1	0	0	1	0
119	1	-1	-1	-1	-1	-1	-1	-1	-1	-1	-1	-1	600	0	3	1	1	1	0	1	0	0	1	0
119	0	1	0	1	0	1	0	-1	-1	-1	-1	-1	1200	1	3	1	1	1	0	1	0	0	1	0
119	0	0	1	1	0	1	0	1	0	0	0	1	600	0	3	1	1	1	0	1	0	0	1	0
119	1	-1	-1	-1	-1	-1	-1	-1	-1	-1	-1	-1	600	0	3	1	1	1	0	1	0	0	1	0
119	0	-1	-1	1	0	0	1	0	1	0	0	1	1800	1	3	1	1	1	0	1	0	0	1	0
119	0	1	0	1	0	-1	-1	1	0	1	0	0	2400	0	3	1	1	1	0	1	0	0	1	0
119	1	-1	-1	-1	-1	-1	-1	-1	-1	-1	-1	-1	600	0	3	1	1	1	0	1	0	0	1	0
120	0	-1	-1	1	0	-1	-1	-1	-1	0	1	0	2400	1	3	1	0	1	0	1	1	0	1	1
120	0	-1	-1	-1	-1	1	0	0	1	-1	-1	-1	2400	0	3	1	0	1	0	1	1	0	1	1
120	1	-1	-1	-1	-1	-1	-1	-1	-1	-1	-1	-1	600	0	3	1	0	1	0	1	1	0	1	1
120	0	1	0	1	0	1	0	-1	-1	-1	-1	-1	1200	0	3	1	0	1	0	1	1	0	1	1
120	0	1	0	-1	-1	-1	-1	1	0	0	0	1	1200	0	3	1	0	1	0	1	1	0	1	1
120	1	-1	-1	-1	-1	-1	-1	-1	-1	-1	-1	-1	600	1	3	1	0	1	0	1	1	0	1	1
120	0	-1	-1	1	0	0	1	0	1	0	0	1	1800	0	3	1	0	1	0	1	1	0	1	1
120	0	0	1	-1	-1	-1	-1	0	1	0	1	0	1200	1	3	1	0	1	0	1	1	0	1	1
120	1	-1	-1	-1	-1	-1	-1	-1	-1	-1	-1	-1	600	0	3	1	0	1	0	1	1	0	1	1
121	0	-1	-1	1	0	-1	-1	-1	-1	0	1	0	2400	1	3	0	0	0	1	1	0	1	1	1
121	0	1	0	0	1	1	0	-1	-1	0	1	0	1800	0	3	0	0	0	1	1	0	1	1	1
121	1	-1	-1	-1	-1	-1	-1	-1	-1	-1	-1	-1	600	0	3	0	0	0	1	1	0	1	1	1
121	0	1	0	1	0	1	0	-1	-1	-1	-1	-1	1200	1	3	0	0	0	1	1	0	1	1	1
121	0	-1	-1	1	0	1	0	1	0	0	1	0	600	0	3	0	0	0	1	1	0	1	1	1
121	1	-1	-1	-1	-1	-1	-1	-1	-1	-1	-1	-1	600	0	3	0	0	0	1	1	0	1	1	1
121	0	-1	-1	1	0	0	1	0	1	0	0	1	1800	0	3	0	0	0	1	1	0	1	1	1
121	0	0	1	1	0	-1	-1	-1	-1	-1	-1	-1	3600	1	3	0	0	0	1	1	0	1	1	1
121	1	-1	-1	-1	-1	-1	-1	-1	-1	-1	-1	-1	600	0	3	0	0	0	1	1	0	1	1	1
122	0	-1	-1	1	0	-1	-1	-1	-1	0	1	0	2400	1	3	1	0	1	0	1	0	0	1	1
122	0	1	0	-1	-1	1	0	-1	-1	0	0	1	2400	0	3	1	0	1	0	1	0	0	1	1
122	1	-1	-1	-1	-1	-1	-1	-1	-1	-1	-1	-1	600	0	3	1	0	1	0	1	0	0	1	1
122	0	1	0	1	0	1	0	-1	-1	-1	-1	-1	1200	1	3	1	0	1	0	1	0	0	1	1
122	0	1	0	-1	-1	0	1	-1	-1	-1	-1	-1	600	0	3	1	0	1	0	1	0	0	1	1
122	1	-1	-1	-1	-1	-1	-1	-1	-1	-1	-1	-1	600	0	3	1	0	1	0	1	0	0	1	1
122	0	-1	-1	1	0	0	1	0	1	0	0	1	1800	1	3	1	0	1	0	1	0	0	1	1
122	0	1	0	1	0	1	0	0	1	-1	-1	-1	3600	0	3	1	0	1	0	1	0	0	1	1
122	1	-1	-1	-1	-1	-1	-1	-1	-1	-1	-1	-1	600	0	3	1	0	1	0	1	0	0	1	1
123	0	-1	-1	1	0	-1	-1	-1	-1	0	1	0	2400	0	3	1	0	0	0	1	1	1	1	1
123	0	1	0	-1	-1	0	1	1	0	0	1	0	3600	0	3	1	0	0	0	1	1	1	1	1
123	1	-1	-1	-1	-1	-1	-1	-1	-1	-1	-1	-1	600	1	3	1	0	0	0	1	1	1	1	1
123	0	1	0	1	0	1	0	-1	-1	-1	-1	-1	1200	1	3	1	0	0	0	1	1	1	1	1
123	0	-1	-1	-1	-1	-1	-1	1	0	-1	-1	-1	1800	0	3	1	0	0	0	1	1	1	1	1
123	1	-1	-1	-1	-1	-1	-1	-1	-1	-1	-1	-1	600	0	3	1	0	0	0	1	1	1	1	1
123	0	-1	-1	1	0	0	1	0	1	0	0	1	1800	1	3	1	0	0	0	1	1	1	1	1
123	0	1	0	1	0	-1	-1	1	0	-1	-1	-1	1800	0	3	1	0	0	0	1	1	1	1	1
123	1	-1	-1	-1	-1	-1	-1	-1	-1	-1	-1	-1	600	0	3	1	0	0	0	1	1	1	1	1
124	0	-1	-1	1	0	-1	-1	-1	-1	0	1	0	2400	0	3	0	0	1	0	1	1	0	1	0
124	0	1	0	0	1	-1	-1	0	1	1	0	0	600	1	3	0	0	1	0	1	1	0	1	0
124	1	-1	-1	-1	-1	-1	-1	-1	-1	-1	-1	-1	600	0	3	0	0	1	0	1	1	0	1	0
124	0	-1	-1	-1	-1	1	0	0	1	-1	-1	-1	2400	0	3	0	0	1	0	1	1	0	1	0
124	0	1	0	0	1	1	0	-1	-1	0	1	0	1800	1	3	0	0	1	0	1	1	0	1	0
124	1	-1	-1	-1	-1	-1	-1	-1	-1	-1	-1	-1	600	0	3	0	0	1	0	1	1	0	1	0
124	0	-1	-1	1	0	0	1	0	1	0	0	1	1800	0	3	0	0	1	0	1	1	0	1	0
124	0	-1	-1	0	1	1	0	1	0	-1	-1	-1	1200	1	3	0	0	1	0	1	1	0	1	0
124	1	-1	-1	-1	-1	-1	-1	-1	-1	-1	-1	-1	600	0	3	0	0	1	0	1	1	0	1	0
125	0	-1	-1	1	0	-1	-1	-1	-1	0	1	0	2400	0	3	1	0	1	0	1	1	0	1	1
125	0	0	1	-1	-1	1	0	-1	-1	1	0	0	1800	1	3	1	0	1	0	1	1	0	1	1
125	1	-1	-1	-1	-1	-1	-1	-1	-1	-1	-1	-1	600	0	3	1	0	1	0	1	1	0	1	1
125	0	-1	-1	-1	-1	1	0	0	1	-1	-1	-1	2400	0	3	1	0	1	0	1	1	0	1	1
125	0	1	0	-1	-1	1	0	-1	-1	0	0	1	2400	1	3	1	0	1	0	1	1	0	1	1
125	1	-1	-1	-1	-1	-1	-1	-1	-1	-1	-1	-1	600	0	3	1	0	1	0	1	1	0	1	1
125	0	-1	-1	1	0	0	1	0	1	0	0	1	1800	1	3	1	0	1	0	1	1	0	1	1
125	0	0	1	1	0	1	0	1	0	0	0	1	600	0	3	1	0	1	0	1	1	0	1	1
125	1	-1	-1	-1	-1	-1	-1	-1	-1	-1	-1	-1	600	0	3	1	0	1	0	1	1	0	1	1
126	0	-1	-1	1	0	-1	-1	-1	-1	0	1	0	2400	1	3	1	0	1	0	1	1	0	1	1
126	0	-1	-1	1	0	0	1	0	1	0	0	1	1800	0	3	1	0	1	0	1	1	0	1	1
126	1	-1	-1	-1	-1	-1	-1	-1	-1	-1	-1	-1	600	0	3	1	0	1	0	1	1	0	1	1
126	0	-1	-1	-1	-1	1	0	0	1	-1	-1	-1	2400	1	3	1	0	1	0	1	1	0	1	1
126	0	1	0	-1	-1	0	1	1	0	0	1	0	3600	0	3	1	0	1	0	1	1	0	1	1
126	1	-1	-1	-1	-1	-1	-1	-1	-1	-1	-1	-1	600	0	3	1	0	1	0	1	1	0	1	1
126	0	-1	-1	1	0	0	1	0	1	0	0	1	1800	0	3	1	0	1	0	1	1	0	1	1
126	0	1	0	-1	-1	-1	-1	1	0	0	0	1	1200	1	3	1	0	1	0	1	1	0	1	1
126	1	-1	-1	-1	-1	-1	-1	-1	-1	-1	-1	-1	600	0	3	1	0	1	0	1	1	0	1	1
127	0	-1	-1	1	0	-1	-1	-1	-1	0	1	0	2400	0	3	1	0	0	0	1	0	0	0	1
127	0	1	0	1	0	-1	-1	1	0	1	0	0	2400	0	3	1	0	0	0	1	0	0	0	1
127	1	-1	-1	-1	-1	-1	-1	-1	-1	-1	-1	-1	600	1	3	1	0	0	0	1	0	0	0	1
127	0	-1	-1	-1	-1	1	0	0	1	-1	-1	-1	2400	0	3	1	0	0	0	1	0	0	0	1
127	0	1	0	0	1	-1	-1	0	1	1	0	0	600	1	3	1	0	0	0	1	0	0	0	1
127	1	-1	-1	-1	-1	-1	-1	-1	-1	-1	-1	-1	600	0	3	1	0	0	0	1	0	0	0	1
127	0	-1	-1	1	0	0	1	0	1	0	0	1	1800	1	3	1	0	0	0	1	0	0	0	1
127	0	-1	-1	1	0	1	0	1	0	0	1	0	600	0	3	1	0	0	0	1	0	0	0	1
127	1	-1	-1	-1	-1	-1	-1	-1	-1	-1	-1	-1	600	0	3	1	0	0	0	1	0	0	0	1
128	0	-1	-1	1	0	-1	-1	-1	-1	0	1	0	2400	0	3	0	1	1	0	1	0	0	0	1
128	0	0	1	-1	-1	-1	-1	0	1	0	1	0	1200	1	3	0	1	1	0	1	0	0	0	1
128	1	-1	-1	-1	-1	-1	-1	-1	-1	-1	-1	-1	600	0	3	0	1	1	0	1	0	0	0	1
128	0	-1	-1	-1	-1	1	0	0	1	-1	-1	-1	2400	1	3	0	1	1	0	1	0	0	0	1
128	0	0	1	-1	-1	1	0	-1	-1	1	0	0	1800	0	3	0	1	1	0	1	0	0	0	1
128	1	-1	-1	-1	-1	-1	-1	-1	-1	-1	-1	-1	600	0	3	0	1	1	0	1	0	0	0	1
128	0	-1	-1	1	0	0	1	0	1	0	0	1	1800	1	3	0	1	1	0	1	0	0	0	1
128	0	1	0	-1	-1	0	1	-1	-1	-1	-1	-1	600	0	3	0	1	1	0	1	0	0	0	1
128	1	-1	-1	-1	-1	-1	-1	-1	-1	-1	-1	-1	600	0	3	0	1	1	0	1	0	0	0	1
129	0	-1	-1	1	0	-1	-1	-1	-1	0	1	0	2400	0	3	1	1	1	1	1	0	0	0	1
129	0	0	1	1	0	-1	-1	-1	-1	-1	-1	-1	3600	0	3	1	1	1	1	1	0	0	0	1
129	1	-1	-1	-1	-1	-1	-1	-1	-1	-1	-1	-1	600	1	3	1	1	1	1	1	0	0	0	1
129	0	-1	-1	-1	-1	1	0	0	1	-1	-1	-1	2400	1	3	1	1	1	1	1	0	0	0	1
129	0	-1	-1	1	0	0	1	0	1	0	0	1	1800	0	3	1	1	1	1	1	0	0	0	1
129	1	-1	-1	-1	-1	-1	-1	-1	-1	-1	-1	-1	600	0	3	1	1	1	1	1	0	0	0	1
129	0	-1	-1	1	0	0	1	0	1	0	0	1	1800	1	3	1	1	1	1	1	0	0	0	1
129	0	-1	-1	-1	-1	-1	-1	1	0	-1	-1	-1	1800	0	3	1	1	1	1	1	0	0	0	1
129	1	-1	-1	-1	-1	-1	-1	-1	-1	-1	-1	-1	600	0	3	1	1	1	1	1	0	0	0	1
130	0	-1	-1	1	0	-1	-1	-1	-1	0	1	0	2400	0	3	0	0	1	0	1	0	0	0	1
130	0	1	0	1	0	1	0	0	1	-1	-1	-1	3600	1	3	0	0	1	0	1	0	0	0	1
130	1	-1	-1	-1	-1	-1	-1	-1	-1	-1	-1	-1	600	0	3	0	0	1	0	1	0	0	0	1
130	0	-1	-1	-1	-1	1	0	0	1	-1	-1	-1	2400	0	3	0	0	1	0	1	0	0	0	1
130	0	1	0	1	0	-1	-1	1	0	1	0	0	2400	1	3	0	0	1	0	1	0	0	0	1
130	1	-1	-1	-1	-1	-1	-1	-1	-1	-1	-1	-1	600	0	3	0	0	1	0	1	0	0	0	1
130	0	1	0	1	0	-1	-1	1	0	1	0	0	2400	0	3	0	0	1	0	1	0	0	0	1
130	0	0	1	-1	-1	-1	-1	0	1	0	1	0	1200	1	3	0	0	1	0	1	0	0	0	1
130	1	-1	-1	-1	-1	-1	-1	-1	-1	-1	-1	-1	600	0	3	0	0	1	0	1	0	0	0	1
131	0	-1	-1	1	0	-1	-1	-1	-1	0	1	0	2400	0	3	1	1	1	1	1	0	0	0	1
131	0	1	0	1	0	-1	-1	1	0	-1	-1	-1	1800	0	3	1	1	1	1	1	0	0	0	1
131	1	-1	-1	-1	-1	-1	-1	-1	-1	-1	-1	-1	600	1	3	1	1	1	1	1	0	0	0	1
131	0	-1	-1	-1	-1	1	0	0	1	-1	-1	-1	2400	0	3	1	1	1	1	1	0	0	0	1
131	0	0	1	-1	-1	-1	-1	0	1	0	1	0	1200	1	3	1	1	1	1	1	0	0	0	1
131	1	-1	-1	-1	-1	-1	-1	-1	-1	-1	-1	-1	600	0	3	1	1	1	1	1	0	0	0	1
131	0	1	0	1	0	-1	-1	1	0	1	0	0	2400	0	3	1	1	1	1	1	0	0	0	1
131	0	0	1	1	0	-1	-1	-1	-1	-1	-1	-1	3600	1	3	1	1	1	1	1	0	0	0	1
131	1	-1	-1	-1	-1	-1	-1	-1	-1	-1	-1	-1	600	0	3	1	1	1	1	1	0	0	0	1
132	0	-1	-1	1	0	-1	-1	-1	-1	0	1	0	2400	0	3	1	1	0	1	1	0	1	0	1
132	0	-1	-1	0	1	1	0	1	0	-1	-1	-1	1200	1	3	1	1	0	1	1	0	1	0	1
132	1	-1	-1	-1	-1	-1	-1	-1	-1	-1	-1	-1	600	0	3	1	1	0	1	1	0	1	0	1
132	0	-1	-1	-1	-1	1	0	0	1	-1	-1	-1	2400	0	3	1	1	0	1	1	0	1	0	1
132	0	0	1	1	0	-1	-1	-1	-1	-1	-1	-1	3600	1	3	1	1	0	1	1	0	1	0	1
132	1	-1	-1	-1	-1	-1	-1	-1	-1	-1	-1	-1	600	0	3	1	1	0	1	1	0	1	0	1
132	0	1	0	1	0	-1	-1	1	0	1	0	0	2400	0	3	1	1	0	1	1	0	1	0	1
132	0	1	0	1	0	1	0	0	1	-1	-1	-1	3600	1	3	1	1	0	1	1	0	1	0	1
132	1	-1	-1	-1	-1	-1	-1	-1	-1	-1	-1	-1	600	0	3	1	1	0	1	1	0	1	0	1
133	0	-1	-1	1	0	-1	-1	-1	-1	0	1	0	2400	1	3	1	0	1	0	1	0	0	0	1
133	0	0	1	1	0	1	0	1	0	0	0	1	600	0	3	1	0	1	0	1	0	0	0	1
133	1	-1	-1	-1	-1	-1	-1	-1	-1	-1	-1	-1	600	0	3	1	0	1	0	1	0	0	0	1
133	0	-1	-1	-1	-1	1	0	0	1	-1	-1	-1	2400	0	3	1	0	1	0	1	0	0	0	1
133	0	1	0	1	0	1	0	0	1	-1	-1	-1	3600	0	3	1	0	1	0	1	0	0	0	1
133	1	-1	-1	-1	-1	-1	-1	-1	-1	-1	-1	-1	600	1	3	1	0	1	0	1	0	0	0	1
133	0	1	0	1	0	-1	-1	1	0	1	0	0	2400	0	3	1	0	1	0	1	0	0	0	1
133	0	1	0	1	0	-1	-1	1	0	-1	-1	-1	1800	1	3	1	0	1	0	1	0	0	0	1
133	1	-1	-1	-1	-1	-1	-1	-1	-1	-1	-1	-1	600	0	3	1	0	1	0	1	0	0	0	1
134	0	-1	-1	1	0	-1	-1	-1	-1	0	1	0	2400	0	3	1	0	1	0	1	0	0	0	1
134	0	1	0	-1	-1	-1	-1	1	0	0	0	1	1200	0	3	1	0	1	0	1	0	0	0	1
134	1	-1	-1	-1	-1	-1	-1	-1	-1	-1	-1	-1	600	1	3	1	0	1	0	1	0	0	0	1
134	0	-1	-1	-1	-1	1	0	0	1	-1	-1	-1	2400	0	3	1	0	1	0	1	0	0	0	1
134	0	1	0	1	0	-1	-1	1	0	-1	-1	-1	1800	1	3	1	0	1	0	1	0	0	0	1
134	1	-1	-1	-1	-1	-1	-1	-1	-1	-1	-1	-1	600	0	3	1	0	1	0	1	0	0	0	1
134	0	1	0	1	0	-1	-1	1	0	1	0	0	2400	0	3	1	0	1	0	1	0	0	0	1
134	0	-1	-1	0	1	1	0	1	0	-1	-1	-1	1200	1	3	1	0	1	0	1	0	0	0	1
134	1	-1	-1	-1	-1	-1	-1	-1	-1	-1	-1	-1	600	0	3	1	0	1	0	1	0	0	0	1
135	0	-1	-1	1	0	-1	-1	-1	-1	0	1	0	2400	1	3	1	1	1	0	1	0	1	0	1
135	0	-1	-1	1	0	1	0	1	0	0	1	0	600	0	3	1	1	1	0	1	0	1	0	1
135	1	-1	-1	-1	-1	-1	-1	-1	-1	-1	-1	-1	600	0	3	1	1	1	0	1	0	1	0	1
135	0	-1	-1	-1	-1	1	0	0	1	-1	-1	-1	2400	0	3	1	1	1	0	1	0	1	0	1
135	0	-1	-1	0	1	1	0	1	0	-1	-1	-1	1200	1	3	1	1	1	0	1	0	1	0	1
135	1	-1	-1	-1	-1	-1	-1	-1	-1	-1	-1	-1	600	0	3	1	1	1	0	1	0	1	0	1
135	0	1	0	1	0	-1	-1	1	0	1	0	0	2400	0	3	1	1	1	0	1	0	1	0	1
135	0	0	1	1	0	1	0	1	0	0	0	1	600	1	3	1	1	1	0	1	0	1	0	1
135	1	-1	-1	-1	-1	-1	-1	-1	-1	-1	-1	-1	600	0	3	1	1	1	0	1	0	1	0	1
136	0	-1	-1	1	0	-1	-1	-1	-1	0	1	0	2400	1	3	1	1	1	1	1	0	1	0	1
136	0	1	0	-1	-1	0	1	-1	-1	-1	-1	-1	600	0	3	1	1	1	1	1	0	1	0	1
136	1	-1	-1	-1	-1	-1	-1	-1	-1	-1	-1	-1	600	0	3	1	1	1	1	1	0	1	0	1
136	0	-1	-1	-1	-1	1	0	0	1	-1	-1	-1	2400	0	3	1	1	1	1	1	0	1	0	1
136	0	0	1	1	0	1	0	1	0	0	0	1	600	1	3	1	1	1	1	1	0	1	0	1
136	1	-1	-1	-1	-1	-1	-1	-1	-1	-1	-1	-1	600	0	3	1	1	1	1	1	0	1	0	1
136	0	1	0	1	0	-1	-1	1	0	1	0	0	2400	0	3	1	1	1	1	1	0	1	0	1
136	0	1	0	-1	-1	-1	-1	1	0	0	0	1	1200	0	3	1	1	1	1	1	0	1	0	1
136	1	-1	-1	-1	-1	-1	-1	-1	-1	-1	-1	-1	600	1	3	1	1	1	1	1	0	1	0	1
137	0	-1	-1	1	0	-1	-1	-1	-1	0	1	0	2400	0	3	1	0	0	0	0	0	1	0	1
137	0	-1	-1	-1	-1	-1	-1	1	0	-1	-1	-1	1800	1	3	1	0	0	0	0	0	1	0	1
137	1	-1	-1	-1	-1	-1	-1	-1	-1	-1	-1	-1	600	0	3	1	0	0	0	0	0	1	0	1
137	0	-1	-1	-1	-1	1	0	0	1	-1	-1	-1	2400	0	3	1	0	0	0	0	0	1	0	1
137	0	1	0	-1	-1	-1	-1	1	0	0	0	1	1200	1	3	1	0	0	0	0	0	1	0	1
137	1	-1	-1	-1	-1	-1	-1	-1	-1	-1	-1	-1	600	0	3	1	0	0	0	0	0	1	0	1
137	0	1	0	1	0	-1	-1	1	0	1	0	0	2400	0	3	1	0	0	0	0	0	1	0	1
137	0	-1	-1	1	0	1	0	1	0	0	1	0	600	1	3	1	0	0	0	0	0	1	0	1
137	1	-1	-1	-1	-1	-1	-1	-1	-1	-1	-1	-1	600	0	3	1	0	0	0	0	0	1	0	1
138	0	0	1	0	1	0	1	1	0	-1	-1	-1	2400	1	3	0	1	1	0	0	0	1	0	1
138	0	-1	-1	1	0	0	1	-1	-1	1	0	0	1200	0	3	0	1	1	0	0	0	1	0	1
138	1	-1	-1	-1	-1	-1	-1	-1	-1	-1	-1	-1	600	0	3	0	1	1	0	0	0	1	0	1
138	0	-1	-1	-1	-1	1	0	0	1	-1	-1	-1	2400	1	3	0	1	1	0	0	0	1	0	1
138	0	-1	-1	1	0	1	0	1	0	0	1	0	600	0	3	0	1	1	0	0	0	1	0	1
138	1	-1	-1	-1	-1	-1	-1	-1	-1	-1	-1	-1	600	0	3	0	1	1	0	0	0	1	0	1
138	0	1	0	1	0	-1	-1	1	0	1	0	0	2400	1	3	0	1	1	0	0	0	1	0	1
138	0	1	0	-1	-1	0	1	-1	-1	-1	-1	-1	600	0	3	0	1	1	0	0	0	1	0	1
138	1	-1	-1	-1	-1	-1	-1	-1	-1	-1	-1	-1	600	0	3	0	1	1	0	0	0	1	0	1
139	0	0	1	0	1	0	1	1	0	-1	-1	-1	2400	1	3	1	1	1	1	0	1	1	0	1
139	0	-1	-1	-1	-1	1	0	1	0	1	0	0	3600	0	3	1	1	1	1	0	1	1	0	1
139	1	-1	-1	-1	-1	-1	-1	-1	-1	-1	-1	-1	600	0	3	1	1	1	1	0	1	1	0	1
139	0	-1	-1	-1	-1	1	0	0	1	-1	-1	-1	2400	1	3	1	1	1	1	0	1	1	0	1
139	0	1	0	-1	-1	0	1	-1	-1	-1	-1	-1	600	0	3	1	1	1	1	0	1	1	0	1
139	1	-1	-1	-1	-1	-1	-1	-1	-1	-1	-1	-1	600	0	3	1	1	1	1	0	1	1	0	1
139	0	1	0	1	0	-1	-1	1	0	1	0	0	2400	1	3	1	1	1	1	0	1	1	0	1
139	0	-1	-1	-1	-1	-1	-1	1	0	-1	-1	-1	1800	0	3	1	1	1	1	0	1	1	0	1
139	1	-1	-1	-1	-1	-1	-1	-1	-1	-1	-1	-1	600	0	3	1	1	1	1	0	1	1	0	1
140	0	0	1	0	1	0	1	1	0	-1	-1	-1	2400	0	3	1	0	1	1	1	0	0	0	1
140	0	1	0	1	0	1	0	-1	-1	-1	-1	-1	1200	0	3	1	0	1	1	1	0	0	0	1
140	1	-1	-1	-1	-1	-1	-1	-1	-1	-1	-1	-1	600	1	3	1	0	1	1	1	0	0	0	1
140	0	-1	-1	-1	-1	1	0	0	1	-1	-1	-1	2400	0	3	1	0	1	1	1	0	0	0	1
140	0	-1	-1	-1	-1	-1	-1	1	0	-1	-1	-1	1800	0	3	1	0	1	1	1	0	0	0	1
140	1	-1	-1	-1	-1	-1	-1	-1	-1	-1	-1	-1	600	1	3	1	0	1	1	1	0	0	0	1
140	0	0	1	-1	-1	-1	-1	0	1	0	1	0	1200	0	3	1	0	1	1	1	0	0	0	1
140	0	0	1	1	0	-1	-1	-1	-1	-1	-1	-1	3600	0	3	1	0	1	1	1	0	0	0	1
140	1	-1	-1	-1	-1	-1	-1	-1	-1	-1	-1	-1	600	1	3	1	0	1	1	1	0	0	0	1
141	0	0	1	0	1	0	1	1	0	-1	-1	-1	2400	1	3	1	1	1	0	1	0	0	0	1
141	0	-1	-1	-1	-1	1	0	0	1	-1	-1	-1	2400	0	3	1	1	1	0	1	0	0	0	1
141	1	-1	-1	-1	-1	-1	-1	-1	-1	-1	-1	-1	600	0	3	1	1	1	0	1	0	0	0	1
141	0	1	0	0	1	1	0	-1	-1	0	1	0	1800	1	3	1	1	1	0	1	0	0	0	1
141	0	1	0	-1	-1	1	0	-1	-1	0	0	1	2400	0	3	1	1	1	0	1	0	0	0	1
141	1	-1	-1	-1	-1	-1	-1	-1	-1	-1	-1	-1	600	0	3	1	1	1	0	1	0	0	0	1
141	0	0	1	-1	-1	-1	-1	0	1	0	1	0	1200	0	3	1	1	1	0	1	0	0	0	1
141	0	1	0	1	0	1	0	0	1	-1	-1	-1	3600	0	3	1	1	1	0	1	0	0	0	1
141	1	-1	-1	-1	-1	-1	-1	-1	-1	-1	-1	-1	600	1	3	1	1	1	0	1	0	0	0	1
142	0	0	1	0	1	0	1	1	0	-1	-1	-1	2400	1	3	1	0	1	0	0	1	0	0	1
142	0	1	0	0	1	1	0	-1	-1	0	1	0	1800	0	3	1	0	1	0	0	1	0	0	1
142	1	-1	-1	-1	-1	-1	-1	-1	-1	-1	-1	-1	600	0	3	1	0	1	0	0	1	0	0	1
142	0	1	0	0	1	1	0	-1	-1	0	1	0	1800	1	3	1	0	1	0	0	1	0	0	1
142	0	1	0	-1	-1	0	1	1	0	0	1	0	3600	0	3	1	0	1	0	0	1	0	0	1
142	1	-1	-1	-1	-1	-1	-1	-1	-1	-1	-1	-1	600	0	3	1	0	1	0	0	1	0	0	1
142	0	0	1	-1	-1	-1	-1	0	1	0	1	0	1200	0	3	1	0	1	0	0	1	0	0	1
142	0	1	0	1	0	-1	-1	1	0	-1	-1	-1	1800	0	3	1	0	1	0	0	1	0	0	1
142	1	-1	-1	-1	-1	-1	-1	-1	-1	-1	-1	-1	600	1	3	1	0	1	0	0	1	0	0	1
143	0	0	1	0	1	0	1	1	0	-1	-1	-1	2400	0	3	1	1	1	0	0	1	0	0	1
143	0	1	0	-1	-1	1	0	-1	-1	0	0	1	2400	0	3	1	1	1	0	0	1	0	0	1
143	1	-1	-1	-1	-1	-1	-1	-1	-1	-1	-1	-1	600	1	3	1	1	1	0	0	1	0	0	1
143	0	1	0	0	1	1	0	-1	-1	0	1	0	1800	1	3	1	1	1	0	0	1	0	0	1
143	0	1	0	0	1	-1	-1	0	1	1	0	0	600	0	3	1	1	1	0	0	1	0	0	1
143	1	-1	-1	-1	-1	-1	-1	-1	-1	-1	-1	-1	600	0	3	1	1	1	0	0	1	0	0	1
143	0	0	1	-1	-1	-1	-1	0	1	0	1	0	1200	0	3	1	1	1	0	0	1	0	0	1
143	0	-1	-1	0	1	1	0	1	0	-1	-1	-1	1200	0	3	1	1	1	0	0	1	0	0	1
143	1	-1	-1	-1	-1	-1	-1	-1	-1	-1	-1	-1	600	1	3	1	1	1	0	0	1	0	0	1
144	0	0	1	0	1	0	1	1	0	-1	-1	-1	2400	0	3	1	0	1	0	0	0	0	0	1
144	0	1	0	-1	-1	0	1	1	0	0	1	0	3600	1	3	1	0	1	0	0	0	0	0	1
144	1	-1	-1	-1	-1	-1	-1	-1	-1	-1	-1	-1	600	0	3	1	0	1	0	0	0	0	0	1
144	0	1	0	0	1	1	0	-1	-1	0	1	0	1800	1	3	1	0	1	0	0	0	0	0	1
144	0	0	1	-1	-1	1	0	-1	-1	1	0	0	1800	0	3	1	0	1	0	0	0	0	0	1
144	1	-1	-1	-1	-1	-1	-1	-1	-1	-1	-1	-1	600	0	3	1	0	1	0	0	0	0	0	1
144	0	0	1	-1	-1	-1	-1	0	1	0	1	0	1200	0	3	1	0	1	0	0	0	0	0	1
144	0	0	1	1	0	1	0	1	0	0	0	1	600	0	3	1	0	1	0	0	0	0	0	1
144	1	-1	-1	-1	-1	-1	-1	-1	-1	-1	-1	-1	600	1	3	1	0	1	0	0	0	0	0	1
145	0	0	1	0	1	0	1	1	0	-1	-1	-1	2400	0	3	1	0	1	0	0	0	1	0	1
145	0	1	0	0	1	-1	-1	0	1	1	0	0	600	1	3	1	0	1	0	0	0	1	0	1
145	1	-1	-1	-1	-1	-1	-1	-1	-1	-1	-1	-1	600	0	3	1	0	1	0	0	0	1	0	1
145	0	1	0	0	1	1	0	-1	-1	0	1	0	1800	1	3	1	0	1	0	0	0	1	0	1
145	0	-1	-1	1	0	0	1	0	1	0	0	1	1800	0	3	1	0	1	0	0	0	1	0	1
145	1	-1	-1	-1	-1	-1	-1	-1	-1	-1	-1	-1	600	0	3	1	0	1	0	0	0	1	0	1
145	0	0	1	-1	-1	-1	-1	0	1	0	1	0	1200	0	3	1	0	1	0	0	0	1	0	1
145	0	1	0	-1	-1	-1	-1	1	0	0	0	1	1200	1	3	1	0	1	0	0	0	1	0	1
145	1	-1	-1	-1	-1	-1	-1	-1	-1	-1	-1	-1	600	0	3	1	0	1	0	0	0	1	0	1
146	0	0	1	0	1	0	1	1	0	-1	-1	-1	2400	1	3	0	0	1	0	0	0	0	0	1
146	0	0	1	-1	-1	1	0	-1	-1	1	0	0	1800	0	3	0	0	1	0	0	0	0	0	1
146	1	-1	-1	-1	-1	-1	-1	-1	-1	-1	-1	-1	600	0	3	0	0	1	0	0	0	0	0	1
146	0	1	0	0	1	1	0	-1	-1	0	1	0	1800	1	3	0	0	1	0	0	0	0	0	1
146	0	1	0	1	0	-1	-1	1	0	1	0	0	2400	0	3	0	0	1	0	0	0	0	0	1
146	1	-1	-1	-1	-1	-1	-1	-1	-1	-1	-1	-1	600	0	3	0	0	1	0	0	0	0	0	1
146	0	0	1	-1	-1	-1	-1	0	1	0	1	0	1200	0	3	0	0	1	0	0	0	0	0	1
146	0	-1	-1	1	0	1	0	1	0	0	1	0	600	1	3	0	0	1	0	0	0	0	0	1
146	1	-1	-1	-1	-1	-1	-1	-1	-1	-1	-1	-1	600	0	3	0	0	1	0	0	0	0	0	1
147	0	0	1	0	1	0	1	1	0	-1	-1	-1	2400	0	3	1	1	0	1	1	0	0	0	1
147	0	-1	-1	1	0	0	1	0	1	0	0	1	1800	1	3	1	1	0	1	1	0	0	0	1
147	1	-1	-1	-1	-1	-1	-1	-1	-1	-1	-1	-1	600	0	3	1	1	0	1	1	0	0	0	1
147	0	1	0	0	1	1	0	-1	-1	0	1	0	1800	1	3	1	1	0	1	1	0	0	0	1
147	0	0	1	-1	-1	-1	-1	0	1	0	1	0	1200	0	3	1	1	0	1	1	0	0	0	1
147	1	-1	-1	-1	-1	-1	-1	-1	-1	-1	-1	-1	600	0	3	1	1	0	1	1	0	0	0	1
147	0	0	1	-1	-1	-1	-1	0	1	0	1	0	1200	0	3	1	1	0	1	1	0	0	0	1
147	0	1	0	-1	-1	0	1	-1	-1	-1	-1	-1	600	0	3	1	1	0	1	1	0	0	0	1
147	1	-1	-1	-1	-1	-1	-1	-1	-1	-1	-1	-1	600	1	3	1	1	0	1	1	0	0	0	1
148	0	0	1	0	1	0	1	1	0	-1	-1	-1	2400	0	3	1	1	1	1	0	1	0	0	1
148	0	1	0	1	0	-1	-1	1	0	1	0	0	2400	0	3	1	1	1	1	0	1	0	0	1
148	1	-1	-1	-1	-1	-1	-1	-1	-1	-1	-1	-1	600	1	3	1	1	1	1	0	1	0	0	1
148	0	1	0	0	1	1	0	-1	-1	0	1	0	1800	1	3	1	1	1	1	0	1	0	0	1
148	0	0	1	1	0	-1	-1	-1	-1	-1	-1	-1	3600	0	3	1	1	1	1	0	1	0	0	1
148	1	-1	-1	-1	-1	-1	-1	-1	-1	-1	-1	-1	600	0	3	1	1	1	1	0	1	0	0	1
148	0	0	1	-1	-1	-1	-1	0	1	0	1	0	1200	1	3	1	1	1	1	0	1	0	0	1
148	0	-1	-1	-1	-1	-1	-1	1	0	-1	-1	-1	1800	0	3	1	1	1	1	0	1	0	0	1
148	1	-1	-1	-1	-1	-1	-1	-1	-1	-1	-1	-1	600	0	3	1	1	1	1	0	1	0	0	1
149	0	-1	-1	1	0	0	1	-1	-1	1	0	0	1200	0	3	1	1	0	0	0	0	1	0	1
149	0	1	0	0	1	-1	-1	0	1	1	0	0	600	1	3	1	1	0	0	0	0	1	0	1
149	1	-1	-1	-1	-1	-1	-1	-1	-1	-1	-1	-1	600	0	3	1	1	0	0	0	0	1	0	1
149	0	1	0	-1	-1	1	0	-1	-1	0	0	1	2400	0	3	1	1	0	0	0	0	1	0	1
149	0	1	0	1	0	-1	-1	1	0	-1	-1	-1	1800	0	3	1	1	0	0	0	0	1	0	1
149	1	-1	-1	-1	-1	-1	-1	-1	-1	-1	-1	-1	600	1	3	1	1	0	0	0	0	1	0	1
149	0	1	0	1	0	-1	-1	1	0	-1	-1	-1	1800	0	3	1	1	0	0	0	0	1	0	1
149	0	0	1	1	0	1	0	1	0	0	0	1	600	0	3	1	1	0	0	0	0	1	0	1
149	1	-1	-1	-1	-1	-1	-1	-1	-1	-1	-1	-1	600	1	3	1	1	0	0	0	0	1	0	1
150	0	-1	-1	1	0	0	1	-1	-1	1	0	0	1200	0	3	1	0	1	1	1	0	0	0	1
150	0	0	1	-1	-1	1	0	-1	-1	1	0	0	1800	0	3	1	0	1	1	1	0	0	0	1
150	1	-1	-1	-1	-1	-1	-1	-1	-1	-1	-1	-1	600	1	3	1	0	1	1	1	0	0	0	1
150	0	1	0	-1	-1	1	0	-1	-1	0	0	1	2400	0	3	1	0	1	1	1	0	0	0	1
150	0	-1	-1	0	1	1	0	1	0	-1	-1	-1	1200	0	3	1	0	1	1	1	0	0	0	1
150	1	-1	-1	-1	-1	-1	-1	-1	-1	-1	-1	-1	600	1	3	1	0	1	1	1	0	0	0	1
150	0	1	0	1	0	-1	-1	1	0	-1	-1	-1	1800	0	3	1	0	1	1	1	0	0	0	1
150	0	1	0	-1	-1	-1	-1	1	0	0	0	1	1200	0	3	1	0	1	1	1	0	0	0	1
150	1	-1	-1	-1	-1	-1	-1	-1	-1	-1	-1	-1	600	1	3	1	0	1	1	1	0	0	0	1
151	0	-1	-1	1	0	0	1	-1	-1	1	0	0	1200	0	3	1	0	1	0	1	0	0	0	1
151	0	-1	-1	1	0	0	1	0	1	0	0	1	1800	1	3	1	0	1	0	1	0	0	0	1
151	1	-1	-1	-1	-1	-1	-1	-1	-1	-1	-1	-1	600	0	3	1	0	1	0	1	0	0	0	1
151	0	1	0	-1	-1	1	0	-1	-1	0	0	1	2400	0	3	1	0	1	0	1	0	0	0	1
151	0	0	1	1	0	1	0	1	0	0	0	1	600	0	3	1	0	1	0	1	0	0	0	1
151	1	-1	-1	-1	-1	-1	-1	-1	-1	-1	-1	-1	600	1	3	1	0	1	0	1	0	0	0	1
151	0	1	0	1	0	-1	-1	1	0	-1	-1	-1	1800	0	3	1	0	1	0	1	0	0	0	1
151	0	-1	-1	1	0	1	0	1	0	0	1	0	600	0	3	1	0	1	0	1	0	0	0	1
151	1	-1	-1	-1	-1	-1	-1	-1	-1	-1	-1	-1	600	1	3	1	0	1	0	1	0	0	0	1
152	0	-1	-1	1	0	0	1	-1	-1	1	0	0	1200	0	3	0	0	1	1	1	0	1	0	1
152	0	1	0	1	0	-1	-1	1	0	1	0	0	2400	0	3	0	0	1	1	1	0	1	0	1
152	1	-1	-1	-1	-1	-1	-1	-1	-1	-1	-1	-1	600	1	3	0	0	1	1	1	0	1	0	1
152	0	1	0	-1	-1	1	0	-1	-1	0	0	1	2400	0	3	0	0	1	1	1	0	1	0	1
152	0	1	0	-1	-1	-1	-1	1	0	0	0	1	1200	0	3	0	0	1	1	1	0	1	0	1
152	1	-1	-1	-1	-1	-1	-1	-1	-1	-1	-1	-1	600	1	3	0	0	1	1	1	0	1	0	1
152	0	1	0	1	0	-1	-1	1	0	-1	-1	-1	1800	0	3	0	0	1	1	1	0	1	0	1
152	0	1	0	-1	-1	0	1	-1	-1	-1	-1	-1	600	0	3	0	0	1	1	1	0	1	0	1
152	1	-1	-1	-1	-1	-1	-1	-1	-1	-1	-1	-1	600	1	3	0	0	1	1	1	0	1	0	1
153	0	-1	-1	1	0	0	1	-1	-1	1	0	0	1200	1	3	1	0	1	0	1	0	0	0	1
153	0	0	1	-1	-1	-1	-1	0	1	0	1	0	1200	0	3	1	0	1	0	1	0	0	0	1
153	1	-1	-1	-1	-1	-1	-1	-1	-1	-1	-1	-1	600	0	3	1	0	1	0	1	0	0	0	1
153	0	1	0	-1	-1	1	0	-1	-1	0	0	1	2400	0	3	1	0	1	0	1	0	0	0	1
153	0	-1	-1	1	0	1	0	1	0	0	1	0	600	0	3	1	0	1	0	1	0	0	0	1
153	1	-1	-1	-1	-1	-1	-1	-1	-1	-1	-1	-1	600	1	3	1	0	1	0	1	0	0	0	1
153	0	1	0	1	0	-1	-1	1	0	-1	-1	-1	1800	1	3	1	0	1	0	1	0	0	0	1
153	0	-1	-1	-1	-1	-1	-1	1	0	-1	-1	-1	1800	0	3	1	0	1	0	1	0	0	0	1
153	1	-1	-1	-1	-1	-1	-1	-1	-1	-1	-1	-1	600	0	3	1	0	1	0	1	0	0	0	1
154	0	-1	-1	1	0	0	1	-1	-1	1	0	0	1200	1	3	1	1	1	1	1	0	1	0	0
154	0	0	1	1	0	-1	-1	-1	-1	-1	-1	-1	3600	0	3	1	1	1	1	1	0	1	0	0
154	1	-1	-1	-1	-1	-1	-1	-1	-1	-1	-1	-1	600	0	3	1	1	1	1	1	0	1	0	0
154	0	1	0	-1	-1	1	0	-1	-1	0	0	1	2400	0	3	1	1	1	1	1	0	1	0	0
154	0	1	0	-1	-1	0	1	-1	-1	-1	-1	-1	600	0	3	1	1	1	1	1	0	1	0	0
154	1	-1	-1	-1	-1	-1	-1	-1	-1	-1	-1	-1	600	1	3	1	1	1	1	1	0	1	0	0
154	0	-1	-1	0	1	1	0	1	0	-1	-1	-1	1200	0	3	1	1	1	1	1	0	1	0	0
154	0	0	1	1	0	1	0	1	0	0	0	1	600	1	3	1	1	1	1	1	0	1	0	0
154	1	-1	-1	-1	-1	-1	-1	-1	-1	-1	-1	-1	600	0	3	1	1	1	1	1	0	1	0	0
155	0	-1	-1	1	0	0	1	-1	-1	1	0	0	1200	0	3	1	1	1	1	1	0	0	0	1
155	0	1	0	1	0	1	0	0	1	-1	-1	-1	3600	0	3	1	1	1	1	1	0	0	0	1
155	1	-1	-1	-1	-1	-1	-1	-1	-1	-1	-1	-1	600	1	3	1	1	1	1	1	0	0	0	1
155	0	1	0	-1	-1	1	0	-1	-1	0	0	1	2400	1	3	1	1	1	1	1	0	0	0	1
155	0	-1	-1	-1	-1	-1	-1	1	0	-1	-1	-1	1800	0	3	1	1	1	1	1	0	0	0	1
155	1	-1	-1	-1	-1	-1	-1	-1	-1	-1	-1	-1	600	0	3	1	1	1	1	1	0	0	0	1
155	0	-1	-1	0	1	1	0	1	0	-1	-1	-1	1200	0	3	1	1	1	1	1	0	0	0	1
155	0	1	0	-1	-1	-1	-1	1	0	0	0	1	1200	1	3	1	1	1	1	1	0	0	0	1
155	1	-1	-1	-1	-1	-1	-1	-1	-1	-1	-1	-1	600	0	3	1	1	1	1	1	0	0	0	1
156	0	-1	-1	1	0	0	1	-1	-1	1	0	0	1200	0	3	1	1	1	1	1	0	0	0	1
156	0	1	0	1	0	-1	-1	1	0	-1	-1	-1	1800	0	3	1	1	1	1	1	0	0	0	1
156	1	-1	-1	-1	-1	-1	-1	-1	-1	-1	-1	-1	600	1	3	1	1	1	1	1	0	0	0	1
156	0	1	0	-1	-1	0	1	1	0	0	1	0	3600	0	3	1	1	1	1	1	0	0	0	1
156	0	1	0	0	1	-1	-1	0	1	1	0	0	600	1	3	1	1	1	1	1	0	0	0	1
156	1	-1	-1	-1	-1	-1	-1	-1	-1	-1	-1	-1	600	0	3	1	1	1	1	1	0	0	0	1
156	0	-1	-1	0	1	1	0	1	0	-1	-1	-1	1200	0	3	1	1	1	1	1	0	0	0	1
156	0	-1	-1	1	0	1	0	1	0	0	1	0	600	1	3	1	1	1	1	1	0	0	0	1
156	1	-1	-1	-1	-1	-1	-1	-1	-1	-1	-1	-1	600	0	3	1	1	1	1	1	0	0	0	1
157	0	-1	-1	1	0	0	1	-1	-1	1	0	0	1200	0	3	1	0	0	0	1	0	0	0	1
157	0	-1	-1	0	1	1	0	1	0	-1	-1	-1	1200	0	3	1	0	0	0	1	0	0	0	1
157	1	-1	-1	-1	-1	-1	-1	-1	-1	-1	-1	-1	600	1	3	1	0	0	0	1	0	0	0	1
157	0	1	0	-1	-1	0	1	1	0	0	1	0	3600	1	3	1	0	0	0	1	0	0	0	1
157	0	0	1	-1	-1	1	0	-1	-1	1	0	0	1800	0	3	1	0	0	0	1	0	0	0	1
157	1	-1	-1	-1	-1	-1	-1	-1	-1	-1	-1	-1	600	0	3	1	0	0	0	1	0	0	0	1
157	0	-1	-1	0	1	1	0	1	0	-1	-1	-1	1200	0	3	1	0	0	0	1	0	0	0	1
157	0	1	0	-1	-1	0	1	-1	-1	-1	-1	-1	600	1	3	1	0	0	0	1	0	0	0	1
157	1	-1	-1	-1	-1	-1	-1	-1	-1	-1	-1	-1	600	0	3	1	0	0	0	1	0	0	0	1
158	0	-1	-1	1	0	0	1	-1	-1	1	0	0	1200	0	3	0	1	1	1	1	0	0	0	1
158	0	0	1	1	0	1	0	1	0	0	0	1	600	1	3	0	1	1	1	1	0	0	0	1
158	1	-1	-1	-1	-1	-1	-1	-1	-1	-1	-1	-1	600	0	3	0	1	1	1	1	0	0	0	1
158	0	1	0	-1	-1	0	1	1	0	0	1	0	3600	1	3	0	1	1	1	1	0	0	0	1
158	0	-1	-1	1	0	0	1	0	1	0	0	1	1800	0	3	0	1	1	1	1	0	0	0	1
158	1	-1	-1	-1	-1	-1	-1	-1	-1	-1	-1	-1	600	0	3	0	1	1	1	1	0	0	0	1
158	0	-1	-1	0	1	1	0	1	0	-1	-1	-1	1200	1	3	0	1	1	1	1	0	0	0	1
158	0	-1	-1	-1	-1	-1	-1	1	0	-1	-1	-1	1800	0	3	0	1	1	1	1	0	0	0	1
158	1	-1	-1	-1	-1	-1	-1	-1	-1	-1	-1	-1	600	0	3	0	1	1	1	1	0	0	0	1
159	0	-1	-1	1	0	0	1	-1	-1	1	0	0	1200	0	3	0	1	1	1	1	0	0	0	1
159	0	1	0	-1	-1	-1	-1	1	0	0	0	1	1200	1	3	0	1	1	1	1	0	0	0	1
159	1	-1	-1	-1	-1	-1	-1	-1	-1	-1	-1	-1	600	0	3	0	1	1	1	1	0	0	0	1
159	0	1	0	-1	-1	0	1	1	0	0	1	0	3600	1	3	0	1	1	1	1	0	0	0	1
159	0	1	0	1	0	-1	-1	1	0	1	0	0	2400	0	3	0	1	1	1	1	0	0	0	1
159	1	-1	-1	-1	-1	-1	-1	-1	-1	-1	-1	-1	600	0	3	0	1	1	1	1	0	0	0	1
159	0	0	1	1	0	1	0	1	0	0	0	1	600	0	3	0	1	1	1	1	0	0	0	1
159	0	1	0	-1	-1	-1	-1	1	0	0	0	1	1200	1	3	0	1	1	1	1	0	0	0	1
159	1	-1	-1	-1	-1	-1	-1	-1	-1	-1	-1	-1	600	0	3	0	1	1	1	1	0	0	0	1
160	0	-1	-1	1	0	0	1	-1	-1	1	0	0	1200	0	3	0	0	1	0	1	0	0	0	1
160	0	-1	-1	1	0	1	0	1	0	0	1	0	600	1	3	0	0	1	0	1	0	0	0	1
160	1	-1	-1	-1	-1	-1	-1	-1	-1	-1	-1	-1	600	0	3	0	0	1	0	1	0	0	0	1
160	0	1	0	-1	-1	0	1	1	0	0	1	0	3600	1	3	0	0	1	0	1	0	0	0	1
160	0	0	1	-1	-1	-1	-1	0	1	0	1	0	1200	0	3	0	0	1	0	1	0	0	0	1
160	1	-1	-1	-1	-1	-1	-1	-1	-1	-1	-1	-1	600	0	3	0	0	1	0	1	0	0	0	1
160	0	0	1	1	0	1	0	1	0	0	0	1	600	1	3	0	0	1	0	1	0	0	0	1
160	0	-1	-1	1	0	1	0	1	0	0	1	0	600	0	3	0	0	1	0	1	0	0	0	1
160	1	-1	-1	-1	-1	-1	-1	-1	-1	-1	-1	-1	600	0	3	0	0	1	0	1	0	0	0	1
161	0	-1	-1	1	0	0	1	-1	-1	1	0	0	1200	0	3	1	1	0	1	0	0	1	0	1
161	0	1	0	-1	-1	0	1	-1	-1	-1	-1	-1	600	0	3	1	1	0	1	0	0	1	0	1
161	1	-1	-1	-1	-1	-1	-1	-1	-1	-1	-1	-1	600	1	3	1	1	0	1	0	0	1	0	1
161	0	1	0	-1	-1	0	1	1	0	0	1	0	3600	1	3	1	1	0	1	0	0	1	0	1
161	0	0	1	1	0	-1	-1	-1	-1	-1	-1	-1	3600	0	3	1	1	0	1	0	0	1	0	1
161	1	-1	-1	-1	-1	-1	-1	-1	-1	-1	-1	-1	600	0	3	1	1	0	1	0	0	1	0	1
161	0	0	1	1	0	1	0	1	0	0	0	1	600	0	3	1	1	0	1	0	0	1	0	1
161	0	1	0	-1	-1	0	1	-1	-1	-1	-1	-1	600	0	3	1	1	0	1	0	0	1	0	1
161	1	-1	-1	-1	-1	-1	-1	-1	-1	-1	-1	-1	600	1	3	1	1	0	1	0	0	1	0	1
162	0	-1	-1	1	0	0	1	-1	-1	1	0	0	1200	1	3	1	1	1	1	1	0	1	0	1
162	0	-1	-1	-1	-1	-1	-1	1	0	-1	-1	-1	1800	0	3	1	1	1	1	1	0	1	0	1
162	1	-1	-1	-1	-1	-1	-1	-1	-1	-1	-1	-1	600	0	3	1	1	1	1	1	0	1	0	1
162	0	1	0	-1	-1	0	1	1	0	0	1	0	3600	0	3	1	1	1	1	1	0	1	0	1
162	0	1	0	1	0	1	0	0	1	-1	-1	-1	3600	0	3	1	1	1	1	1	0	1	0	1
162	1	-1	-1	-1	-1	-1	-1	-1	-1	-1	-1	-1	600	1	3	1	1	1	1	1	0	1	0	1
162	0	0	1	1	0	1	0	1	0	0	0	1	600	1	3	1	1	1	1	1	0	1	0	1
162	0	-1	-1	-1	-1	-1	-1	1	0	-1	-1	-1	1800	0	3	1	1	1	1	1	0	1	0	1
162	1	-1	-1	-1	-1	-1	-1	-1	-1	-1	-1	-1	600	0	3	1	1	1	1	1	0	1	0	1
163	0	-1	-1	-1	-1	1	0	1	0	1	0	0	3600	0	3	1	1	0	0	0	0	1	0	1
163	0	1	0	1	0	1	0	-1	-1	-1	-1	-1	1200	0	3	1	1	0	0	0	0	1	0	1
163	1	-1	-1	-1	-1	-1	-1	-1	-1	-1	-1	-1	600	1	3	1	1	0	0	0	0	1	0	1
163	0	1	0	-1	-1	0	1	1	0	0	1	0	3600	1	3	1	1	0	0	0	0	1	0	1
163	0	1	0	1	0	-1	-1	1	0	-1	-1	-1	1800	0	3	1	1	0	0	0	0	1	0	1
163	1	-1	-1	-1	-1	-1	-1	-1	-1	-1	-1	-1	600	0	3	1	1	0	0	0	0	1	0	1
163	0	1	0	-1	-1	-1	-1	1	0	0	0	1	1200	1	3	1	1	0	0	0	0	1	0	1
163	0	-1	-1	1	0	1	0	1	0	0	1	0	600	0	3	1	1	0	0	0	0	1	0	1
163	1	-1	-1	-1	-1	-1	-1	-1	-1	-1	-1	-1	600	0	3	1	1	0	0	0	0	1	0	1
164	0	-1	-1	-1	-1	1	0	1	0	1	0	0	3600	1	3	1	1	1	0	1	0	1	0	1
164	0	-1	-1	-1	-1	1	0	0	1	-1	-1	-1	2400	0	3	1	1	1	0	1	0	1	0	1
164	1	-1	-1	-1	-1	-1	-1	-1	-1	-1	-1	-1	600	0	3	1	1	1	0	1	0	1	0	1
164	0	1	0	-1	-1	0	1	1	0	0	1	0	3600	1	3	1	1	1	0	1	0	1	0	1
164	0	-1	-1	0	1	1	0	1	0	-1	-1	-1	1200	0	3	1	1	1	0	1	0	1	0	1
164	1	-1	-1	-1	-1	-1	-1	-1	-1	-1	-1	-1	600	0	3	1	1	1	0	1	0	1	0	1
164	0	1	0	-1	-1	-1	-1	1	0	0	0	1	1200	1	3	1	1	1	0	1	0	1	0	1
164	0	1	0	-1	-1	0	1	-1	-1	-1	-1	-1	600	0	3	1	1	1	0	1	0	1	0	1
164	1	-1	-1	-1	-1	-1	-1	-1	-1	-1	-1	-1	600	0	3	1	1	1	0	1	0	1	0	1
165	0	-1	-1	-1	-1	1	0	1	0	1	0	0	3600	0	3	1	1	1	1	1	0	1	0	1
165	0	1	0	0	1	1	0	-1	-1	0	1	0	1800	0	3	1	1	1	1	1	0	1	0	1
165	1	-1	-1	-1	-1	-1	-1	-1	-1	-1	-1	-1	600	1	3	1	1	1	1	1	0	1	0	1
165	0	1	0	-1	-1	0	1	1	0	0	1	0	3600	1	3	1	1	1	1	1	0	1	0	1
165	0	0	1	1	0	1	0	1	0	0	0	1	600	0	3	1	1	1	1	1	0	1	0	1
165	1	-1	-1	-1	-1	-1	-1	-1	-1	-1	-1	-1	600	0	3	1	1	1	1	1	0	1	0	1
165	0	1	0	-1	-1	-1	-1	1	0	0	0	1	1200	1	3	1	1	1	1	1	0	1	0	1
165	0	-1	-1	-1	-1	-1	-1	1	0	-1	-1	-1	1800	0	3	1	1	1	1	1	0	1	0	1
165	1	-1	-1	-1	-1	-1	-1	-1	-1	-1	-1	-1	600	0	3	1	1	1	1	1	0	1	0	1
166	0	-1	-1	-1	-1	1	0	1	0	1	0	0	3600	0	3	1	0	1	0	1	0	1	0	1
166	0	1	0	-1	-1	1	0	-1	-1	0	0	1	2400	0	3	1	0	1	0	1	0	1	0	1
166	1	-1	-1	-1	-1	-1	-1	-1	-1	-1	-1	-1	600	1	3	1	0	1	0	1	0	1	0	1
166	0	1	0	-1	-1	0	1	1	0	0	1	0	3600	0	3	1	0	1	0	1	0	1	0	1
166	0	1	0	-1	-1	-1	-1	1	0	0	0	1	1200	0	3	1	0	1	0	1	0	1	0	1
166	1	-1	-1	-1	-1	-1	-1	-1	-1	-1	-1	-1	600	1	3	1	0	1	0	1	0	1	0	1
166	0	-1	-1	1	0	1	0	1	0	0	1	0	600	0	3	1	0	1	0	1	0	1	0	1
166	0	1	0	-1	-1	0	1	-1	-1	-1	-1	-1	600	0	3	1	0	1	0	1	0	1	0	1
166	1	-1	-1	-1	-1	-1	-1	-1	-1	-1	-1	-1	600	1	3	1	0	1	0	1	0	1	0	1
167	0	-1	-1	-1	-1	1	0	1	0	1	0	0	3600	0	3	1	0	1	0	1	0	1	0	0
167	0	1	0	-1	-1	0	1	1	0	0	1	0	3600	0	3	1	0	1	0	1	0	1	0	0
167	1	-1	-1	-1	-1	-1	-1	-1	-1	-1	-1	-1	600	1	3	1	0	1	0	1	0	1	0	0
167	0	1	0	-1	-1	0	1	1	0	0	1	0	3600	1	3	1	0	1	0	1	0	1	0	0
167	0	-1	-1	1	0	1	0	1	0	0	1	0	600	0	3	1	0	1	0	1	0	1	0	0
167	1	-1	-1	-1	-1	-1	-1	-1	-1	-1	-1	-1	600	0	3	1	0	1	0	1	0	1	0	0
167	0	-1	-1	1	0	1	0	1	0	0	1	0	600	1	3	1	0	1	0	1	0	1	0	0
167	0	-1	-1	-1	-1	-1	-1	1	0	-1	-1	-1	1800	0	3	1	0	1	0	1	0	1	0	0
167	1	-1	-1	-1	-1	-1	-1	-1	-1	-1	-1	-1	600	0	3	1	0	1	0	1	0	1	0	0
168	0	-1	-1	-1	-1	1	0	1	0	1	0	0	3600	0	3	0	0	0	0	0	1	1	0	1
168	0	1	0	0	1	-1	-1	0	1	1	0	0	600	1	3	0	0	0	0	0	1	1	0	1
168	1	-1	-1	-1	-1	-1	-1	-1	-1	-1	-1	-1	600	0	3	0	0	0	0	0	1	1	0	1
168	0	1	0	-1	-1	0	1	1	0	0	1	0	3600	0	3	0	0	0	0	0	1	1	0	1
168	0	1	0	-1	-1	0	1	-1	-1	-1	-1	-1	600	1	3	0	0	0	0	0	1	1	0	1
168	1	-1	-1	-1	-1	-1	-1	-1	-1	-1	-1	-1	600	0	3	0	0	0	0	0	1	1	0	1
168	0	1	0	-1	-1	0	1	-1	-1	-1	-1	-1	600	1	3	0	0	0	0	0	1	1	0	1
168	0	-1	-1	-1	-1	-1	-1	1	0	-1	-1	-1	1800	0	3	0	0	0	0	0	1	1	0	1
168	1	-1	-1	-1	-1	-1	-1	-1	-1	-1	-1	-1	600	0	3	0	0	0	0	0	1	1	0	1
169	0	-1	-1	0	1	-1	-1	-1	-1	0	0	1	3600	0	3	1	0	1	0	0	0	1	0	1
169	0	-1	-1	1	0	-1	-1	-1	-1	0	1	0	2400	1	3	1	0	1	0	0	0	1	0	1
169	1	-1	-1	-1	-1	-1	-1	-1	-1	-1	-1	-1	600	0	3	1	0	1	0	0	0	1	0	1
169	0	-1	-1	-1	-1	1	0	1	0	1	0	0	3600	0	3	1	0	1	0	0	0	1	0	1
169	0	0	1	-1	-1	1	0	-1	-1	1	0	0	1800	1	3	1	0	1	0	0	0	1	0	1
169	1	-1	-1	-1	-1	-1	-1	-1	-1	-1	-1	-1	600	0	3	1	0	1	0	0	0	1	0	1
169	0	1	0	-1	-1	0	1	1	0	0	1	0	3600	0	3	1	0	1	0	0	0	1	0	1
169	0	-1	-1	-1	-1	-1	-1	1	0	-1	-1	-1	1800	1	3	1	0	1	0	0	0	1	0	1
169	1	-1	-1	-1	-1	-1	-1	-1	-1	-1	-1	-1	600	0	3	1	0	1	0	0	0	1	0	1
170	0	-1	-1	0	1	-1	-1	-1	-1	0	0	1	3600	0	3	1	1	1	1	0	0	0	0	1
170	0	0	1	0	1	0	1	1	0	-1	-1	-1	2400	1	3	1	1	1	1	0	0	0	0	1
170	1	-1	-1	-1	-1	-1	-1	-1	-1	-1	-1	-1	600	0	3	1	1	1	1	0	0	0	0	1
170	0	-1	-1	-1	-1	1	0	1	0	1	0	0	3600	0	3	1	1	1	1	0	0	0	0	1
170	0	-1	-1	1	0	0	1	0	1	0	0	1	1800	1	3	1	1	1	1	0	0	0	0	1
170	1	-1	-1	-1	-1	-1	-1	-1	-1	-1	-1	-1	600	0	3	1	1	1	1	0	0	0	0	1
170	0	1	0	0	1	-1	-1	0	1	1	0	0	600	0	3	1	1	1	1	0	0	0	0	1
170	0	0	1	-1	-1	1	0	-1	-1	1	0	0	1800	1	3	1	1	1	1	0	0	0	0	1
170	1	-1	-1	-1	-1	-1	-1	-1	-1	-1	-1	-1	600	0	3	1	1	1	1	0	0	0	0	1
171	0	-1	-1	0	1	-1	-1	-1	-1	0	0	1	3600	0	3	1	0	1	1	0	0	0	0	1
171	0	-1	-1	1	0	0	1	-1	-1	1	0	0	1200	1	3	1	0	1	1	0	0	0	0	1
171	1	-1	-1	-1	-1	-1	-1	-1	-1	-1	-1	-1	600	0	3	1	0	1	1	0	0	0	0	1
171	0	-1	-1	-1	-1	1	0	1	0	1	0	0	3600	0	3	1	0	1	1	0	0	0	0	1
171	0	1	0	1	0	-1	-1	1	0	1	0	0	2400	1	3	1	0	1	1	0	0	0	0	1
171	1	-1	-1	-1	-1	-1	-1	-1	-1	-1	-1	-1	600	0	3	1	0	1	1	0	0	0	0	1
171	0	1	0	0	1	-1	-1	0	1	1	0	0	600	1	3	1	0	1	1	0	0	0	0	1
171	0	-1	-1	1	0	0	1	0	1	0	0	1	1800	0	3	1	0	1	1	0	0	0	0	1
171	1	-1	-1	-1	-1	-1	-1	-1	-1	-1	-1	-1	600	0	3	1	0	1	1	0	0	0	0	1
172	0	-1	-1	0	1	-1	-1	-1	-1	0	0	1	3600	1	3	0	0	1	1	0	0	1	0	1
172	0	-1	-1	-1	-1	1	0	1	0	1	0	0	3600	0	3	0	0	1	1	0	0	1	0	1
172	1	-1	-1	-1	-1	-1	-1	-1	-1	-1	-1	-1	600	0	3	0	0	1	1	0	0	1	0	1
172	0	-1	-1	-1	-1	1	0	1	0	1	0	0	3600	0	3	0	0	1	1	0	0	1	0	1
172	0	0	1	-1	-1	-1	-1	0	1	0	1	0	1200	1	3	0	0	1	1	0	0	1	0	1
172	1	-1	-1	-1	-1	-1	-1	-1	-1	-1	-1	-1	600	0	3	0	0	1	1	0	0	1	0	1
172	0	1	0	0	1	-1	-1	0	1	1	0	0	600	0	3	0	0	1	1	0	0	1	0	1
172	0	1	0	1	0	-1	-1	1	0	1	0	0	2400	1	3	0	0	1	1	0	0	1	0	1
172	1	-1	-1	-1	-1	-1	-1	-1	-1	-1	-1	-1	600	0	3	0	0	1	1	0	0	1	0	1
173	0	-1	-1	0	1	-1	-1	-1	-1	0	0	1	3600	1	3	0	1	1	1	0	0	0	0	1
173	0	1	0	1	0	1	0	-1	-1	-1	-1	-1	1200	0	3	0	1	1	1	0	0	0	0	1
173	1	-1	-1	-1	-1	-1	-1	-1	-1	-1	-1	-1	600	0	3	0	1	1	1	0	0	0	0	1
173	0	-1	-1	-1	-1	1	0	1	0	1	0	0	3600	0	3	0	1	1	1	0	0	0	0	1
173	0	0	1	1	0	-1	-1	-1	-1	-1	-1	-1	3600	1	3	0	1	1	1	0	0	0	0	1
173	1	-1	-1	-1	-1	-1	-1	-1	-1	-1	-1	-1	600	0	3	0	1	1	1	0	0	0	0	1
173	0	1	0	0	1	-1	-1	0	1	1	0	0	600	1	3	0	1	1	1	0	0	0	0	1
173	0	0	1	-1	-1	-1	-1	0	1	0	1	0	1200	0	3	0	1	1	1	0	0	0	0	1
173	1	-1	-1	-1	-1	-1	-1	-1	-1	-1	-1	-1	600	0	3	0	1	1	1	0	0	0	0	1
174	0	-1	-1	0	1	-1	-1	-1	-1	0	0	1	3600	0	3	0	1	1	1	0	0	0	0	1
174	0	-1	-1	-1	-1	1	0	0	1	-1	-1	-1	2400	1	3	0	1	1	1	0	0	0	0	1
174	1	-1	-1	-1	-1	-1	-1	-1	-1	-1	-1	-1	600	0	3	0	1	1	1	0	0	0	0	1
174	0	-1	-1	-1	-1	1	0	1	0	1	0	0	3600	0	3	0	1	1	1	0	0	0	0	1
174	0	1	0	1	0	1	0	0	1	-1	-1	-1	3600	0	3	0	1	1	1	0	0	0	0	1
174	1	-1	-1	-1	-1	-1	-1	-1	-1	-1	-1	-1	600	1	3	0	1	1	1	0	0	0	0	1
174	0	1	0	0	1	-1	-1	0	1	1	0	0	600	0	3	0	1	1	1	0	0	0	0	1
174	0	0	1	1	0	-1	-1	-1	-1	-1	-1	-1	3600	1	3	0	1	1	1	0	0	0	0	1
174	1	-1	-1	-1	-1	-1	-1	-1	-1	-1	-1	-1	600	0	3	0	1	1	1	0	0	0	0	1
175	0	-1	-1	0	1	-1	-1	-1	-1	0	0	1	3600	0	3	0	0	1	1	0	0	1	0	1
175	0	1	0	0	1	1	0	-1	-1	0	1	0	1800	1	3	0	0	1	1	0	0	1	0	1
175	1	-1	-1	-1	-1	-1	-1	-1	-1	-1	-1	-1	600	0	3	0	0	1	1	0	0	1	0	1
175	0	-1	-1	-1	-1	1	0	1	0	1	0	0	3600	0	3	0	0	1	1	0	0	1	0	1
175	0	1	0	1	0	-1	-1	1	0	-1	-1	-1	1800	1	3	0	0	1	1	0	0	1	0	1
175	1	-1	-1	-1	-1	-1	-1	-1	-1	-1	-1	-1	600	0	3	0	0	1	1	0	0	1	0	1
175	0	1	0	0	1	-1	-1	0	1	1	0	0	600	0	3	0	0	1	1	0	0	1	0	1
175	0	1	0	1	0	1	0	0	1	-1	-1	-1	3600	1	3	0	0	1	1	0	0	1	0	1
175	1	-1	-1	-1	-1	-1	-1	-1	-1	-1	-1	-1	600	0	3	0	0	1	1	0	0	1	0	1
176	0	-1	-1	0	1	-1	-1	-1	-1	0	0	1	3600	1	3	1	1	1	0	0	0	1	0	1
176	0	1	0	-1	-1	1	0	-1	-1	0	0	1	2400	0	3	1	1	1	0	0	0	1	0	1
176	1	-1	-1	-1	-1	-1	-1	-1	-1	-1	-1	-1	600	0	3	1	1	1	0	0	0	1	0	1
176	0	-1	-1	-1	-1	1	0	1	0	1	0	0	3600	0	3	1	1	1	0	0	0	1	0	1
176	0	-1	-1	0	1	1	0	1	0	-1	-1	-1	1200	1	3	1	1	1	0	0	0	1	0	1
176	1	-1	-1	-1	-1	-1	-1	-1	-1	-1	-1	-1	600	0	3	1	1	1	0	0	0	1	0	1
176	0	1	0	0	1	-1	-1	0	1	1	0	0	600	1	3	1	1	1	0	0	0	1	0	1
176	0	1	0	1	0	-1	-1	1	0	-1	-1	-1	1800	0	3	1	1	1	0	0	0	1	0	1
176	1	-1	-1	-1	-1	-1	-1	-1	-1	-1	-1	-1	600	0	3	1	1	1	0	0	0	1	0	1
177	0	-1	-1	0	1	-1	-1	-1	-1	0	0	1	3600	1	3	1	1	1	1	0	0	0	0	1
177	0	1	0	-1	-1	0	1	1	0	0	1	0	3600	0	3	1	1	1	1	0	0	0	0	1
177	1	-1	-1	-1	-1	-1	-1	-1	-1	-1	-1	-1	600	0	3	1	1	1	1	0	0	0	0	1
177	0	-1	-1	-1	-1	1	0	1	0	1	0	0	3600	0	3	1	1	1	1	0	0	0	0	1
177	0	0	1	1	0	1	0	1	0	0	0	1	600	1	3	1	1	1	1	0	0	0	0	1
177	1	-1	-1	-1	-1	-1	-1	-1	-1	-1	-1	-1	600	0	3	1	1	1	1	0	0	0	0	1
177	0	1	0	0	1	-1	-1	0	1	1	0	0	600	1	3	1	1	1	1	0	0	0	0	1
177	0	-1	-1	0	1	1	0	1	0	-1	-1	-1	1200	0	3	1	1	1	1	0	0	0	0	1
177	1	-1	-1	-1	-1	-1	-1	-1	-1	-1	-1	-1	600	0	3	1	1	1	1	0	0	0	0	1
178	0	-1	-1	0	1	-1	-1	-1	-1	0	0	1	3600	0	3	1	0	1	1	0	0	0	0	1
178	0	1	0	0	1	-1	-1	0	1	1	0	0	600	1	3	1	0	1	1	0	0	0	0	1
178	1	-1	-1	-1	-1	-1	-1	-1	-1	-1	-1	-1	600	0	3	1	0	1	1	0	0	0	0	1
178	0	-1	-1	-1	-1	1	0	1	0	1	0	0	3600	0	3	1	0	1	1	0	0	0	0	1
178	0	1	0	-1	-1	-1	-1	1	0	0	0	1	1200	1	3	1	0	1	1	0	0	0	0	1
178	1	-1	-1	-1	-1	-1	-1	-1	-1	-1	-1	-1	600	0	3	1	0	1	1	0	0	0	0	1
178	0	1	0	0	1	-1	-1	0	1	1	0	0	600	1	3	1	0	1	1	0	0	0	0	1
178	0	0	1	1	0	1	0	1	0	0	0	1	600	0	3	1	0	1	1	0	0	0	0	1
178	1	-1	-1	-1	-1	-1	-1	-1	-1	-1	-1	-1	600	0	3	1	0	1	1	0	0	0	0	1
179	0	-1	-1	0	1	-1	-1	-1	-1	0	0	1	3600	0	3	1	0	1	0	0	0	0	0	1
179	0	0	1	-1	-1	1	0	-1	-1	1	0	0	1800	0	3	1	0	1	0	0	0	0	0	1
179	1	-1	-1	-1	-1	-1	-1	-1	-1	-1	-1	-1	600	1	3	1	0	1	0	0	0	0	0	1
179	0	-1	-1	-1	-1	1	0	1	0	1	0	0	3600	0	3	1	0	1	0	0	0	0	0	1
179	0	-1	-1	1	0	1	0	1	0	0	1	0	600	1	3	1	0	1	0	0	0	0	0	1
179	1	-1	-1	-1	-1	-1	-1	-1	-1	-1	-1	-1	600	0	3	1	0	1	0	0	0	0	0	1
179	0	1	0	0	1	-1	-1	0	1	1	0	0	600	1	3	1	0	1	0	0	0	0	0	1
179	0	1	0	-1	-1	-1	-1	1	0	0	0	1	1200	0	3	1	0	1	0	0	0	0	0	1
179	1	-1	-1	-1	-1	-1	-1	-1	-1	-1	-1	-1	600	0	3	1	0	1	0	0	0	0	0	1
180	0	-1	-1	0	1	-1	-1	-1	-1	0	0	1	3600	1	3	1	0	1	0	1	0	0	0	1
180	0	-1	-1	1	0	0	1	0	1	0	0	1	1800	0	3	1	0	1	0	1	0	0	0	1
180	1	-1	-1	-1	-1	-1	-1	-1	-1	-1	-1	-1	600	0	3	1	0	1	0	1	0	0	0	1
180	0	-1	-1	-1	-1	1	0	1	0	1	0	0	3600	0	3	1	0	1	0	1	0	0	0	1
180	0	1	0	-1	-1	0	1	-1	-1	-1	-1	-1	600	1	3	1	0	1	0	1	0	0	0	1
180	1	-1	-1	-1	-1	-1	-1	-1	-1	-1	-1	-1	600	0	3	1	0	1	0	1	0	0	0	1
180	0	1	0	0	1	-1	-1	0	1	1	0	0	600	1	3	1	0	1	0	1	0	0	0	1
180	0	-1	-1	1	0	1	0	1	0	0	1	0	600	0	3	1	0	1	0	1	0	0	0	1
180	1	-1	-1	-1	-1	-1	-1	-1	-1	-1	-1	-1	600	0	3	1	0	1	0	1	0	0	0	1
181	0	-1	-1	0	1	-1	-1	-1	-1	0	0	1	3600	0	3	1	1	1	1	1	0	0	0	1
181	0	1	0	1	0	-1	-1	1	0	1	0	0	2400	1	3	1	1	1	1	1	0	0	0	1
181	1	-1	-1	-1	-1	-1	-1	-1	-1	-1	-1	-1	600	0	3	1	1	1	1	1	0	0	0	1
181	0	-1	-1	-1	-1	1	0	1	0	1	0	0	3600	0	3	1	1	1	1	1	0	0	0	1
181	0	-1	-1	-1	-1	-1	-1	1	0	-1	-1	-1	1800	1	3	1	1	1	1	1	0	0	0	1
181	1	-1	-1	-1	-1	-1	-1	-1	-1	-1	-1	-1	600	0	3	1	1	1	1	1	0	0	0	1
181	0	1	0	0	1	-1	-1	0	1	1	0	0	600	0	3	1	1	1	1	1	0	0	0	1
181	0	1	0	-1	-1	0	1	-1	-1	-1	-1	-1	600	1	3	1	1	1	1	1	0	0	0	1
181	1	-1	-1	-1	-1	-1	-1	-1	-1	-1	-1	-1	600	0	3	1	1	1	1	1	0	0	0	1
182	0	-1	-1	0	1	-1	-1	-1	-1	0	0	1	3600	0	3	1	0	1	0	1	0	0	0	1
182	0	0	1	-1	-1	-1	-1	0	1	0	1	0	1200	0	3	1	0	1	0	1	0	0	0	1
182	1	-1	-1	-1	-1	-1	-1	-1	-1	-1	-1	-1	600	1	3	1	0	1	0	1	0	0	0	1
182	0	1	0	1	0	1	0	-1	-1	-1	-1	-1	1200	0	3	1	0	1	0	1	0	0	0	1
182	0	-1	-1	-1	-1	1	0	0	1	-1	-1	-1	2400	1	3	1	0	1	0	1	0	0	0	1
182	1	-1	-1	-1	-1	-1	-1	-1	-1	-1	-1	-1	600	0	3	1	0	1	0	1	0	0	0	1
182	0	1	0	0	1	-1	-1	0	1	1	0	0	600	1	3	1	0	1	0	1	0	0	0	1
182	0	-1	-1	-1	-1	-1	-1	1	0	-1	-1	-1	1800	0	3	1	0	1	0	1	0	0	0	1
182	1	-1	-1	-1	-1	-1	-1	-1	-1	-1	-1	-1	600	0	3	1	0	1	0	1	0	0	0	1
183	0	-1	-1	0	1	-1	-1	-1	-1	0	0	1	3600	0	3	1	1	1	1	1	1	0	0	1
183	0	0	1	1	0	-1	-1	-1	-1	-1	-1	-1	3600	1	3	1	1	1	1	1	1	0	0	1
183	1	-1	-1	-1	-1	-1	-1	-1	-1	-1	-1	-1	600	0	3	1	1	1	1	1	1	0	0	1
183	0	1	0	1	0	1	0	-1	-1	-1	-1	-1	1200	0	3	1	1	1	1	1	1	0	0	1
183	0	1	0	0	1	1	0	-1	-1	0	1	0	1800	1	3	1	1	1	1	1	1	0	0	1
183	1	-1	-1	-1	-1	-1	-1	-1	-1	-1	-1	-1	600	0	3	1	1	1	1	1	1	0	0	1
183	0	0	1	-1	-1	1	0	-1	-1	1	0	0	1800	0	3	1	1	1	1	1	1	0	0	1
183	0	-1	-1	1	0	0	1	0	1	0	0	1	1800	1	3	1	1	1	1	1	1	0	0	1
183	1	-1	-1	-1	-1	-1	-1	-1	-1	-1	-1	-1	600	0	3	1	1	1	1	1	1	0	0	1
184	0	-1	-1	0	1	-1	-1	-1	-1	0	0	1	3600	1	3	1	0	1	0	1	1	1	0	1
184	0	1	0	1	0	1	0	0	1	-1	-1	-1	3600	0	3	1	0	1	0	1	1	1	0	1
184	1	-1	-1	-1	-1	-1	-1	-1	-1	-1	-1	-1	600	0	3	1	0	1	0	1	1	1	0	1
184	0	1	0	1	0	1	0	-1	-1	-1	-1	-1	1200	0	3	1	0	1	0	1	1	1	0	1
184	0	1	0	-1	-1	1	0	-1	-1	0	0	1	2400	1	3	1	0	1	0	1	1	1	0	1
184	1	-1	-1	-1	-1	-1	-1	-1	-1	-1	-1	-1	600	0	3	1	0	1	0	1	1	1	0	1
184	0	0	1	-1	-1	1	0	-1	-1	1	0	0	1800	0	3	1	0	1	0	1	1	1	0	1
184	0	1	0	1	0	-1	-1	1	0	1	0	0	2400	1	3	1	0	1	0	1	1	1	0	1
184	1	-1	-1	-1	-1	-1	-1	-1	-1	-1	-1	-1	600	0	3	1	0	1	0	1	1	1	0	1
185	0	-1	-1	0	1	-1	-1	-1	-1	0	0	1	3600	0	3	1	0	1	0	1	1	0	0	1
185	0	1	0	1	0	-1	-1	1	0	-1	-1	-1	1800	0	3	1	0	1	0	1	1	0	0	1
185	1	-1	-1	-1	-1	-1	-1	-1	-1	-1	-1	-1	600	1	3	1	0	1	0	1	1	0	0	1
185	0	1	0	1	0	1	0	-1	-1	-1	-1	-1	1200	0	3	1	0	1	0	1	1	0	0	1
185	0	1	0	-1	-1	0	1	1	0	0	1	0	3600	0	3	1	0	1	0	1	1	0	0	1
185	1	-1	-1	-1	-1	-1	-1	-1	-1	-1	-1	-1	600	1	3	1	0	1	0	1	1	0	0	1
185	0	0	1	-1	-1	1	0	-1	-1	1	0	0	1800	0	3	1	0	1	0	1	1	0	0	1
185	0	0	1	-1	-1	-1	-1	0	1	0	1	0	1200	0	3	1	0	1	0	1	1	0	0	1
185	1	-1	-1	-1	-1	-1	-1	-1	-1	-1	-1	-1	600	1	3	1	0	1	0	1	1	0	0	1
186	0	-1	-1	0	1	-1	-1	-1	-1	0	0	1	3600	1	3	1	0	1	0	1	0	0	0	1
186	0	-1	-1	0	1	1	0	1	0	-1	-1	-1	1200	0	3	1	0	1	0	1	0	0	0	1
186	1	-1	-1	-1	-1	-1	-1	-1	-1	-1	-1	-1	600	0	3	1	0	1	0	1	0	0	0	1
186	0	1	0	1	0	1	0	-1	-1	-1	-1	-1	1200	1	3	1	0	1	0	1	0	0	0	1
186	0	1	0	0	1	-1	-1	0	1	1	0	0	600	0	3	1	0	1	0	1	0	0	0	1
186	1	-1	-1	-1	-1	-1	-1	-1	-1	-1	-1	-1	600	0	3	1	0	1	0	1	0	0	0	1
186	0	0	1	-1	-1	1	0	-1	-1	1	0	0	1800	0	3	1	0	1	0	1	0	0	0	1
186	0	0	1	1	0	-1	-1	-1	-1	-1	-1	-1	3600	0	3	1	0	1	0	1	0	0	0	1
186	1	-1	-1	-1	-1	-1	-1	-1	-1	-1	-1	-1	600	1	3	1	0	1	0	1	0	0	0	1
187	0	-1	-1	0	1	-1	-1	-1	-1	0	0	1	3600	0	3	1	1	0	0	1	0	1	0	1
187	0	0	1	1	0	1	0	1	0	0	0	1	600	1	3	1	1	0	0	1	0	1	0	1
187	1	-1	-1	-1	-1	-1	-1	-1	-1	-1	-1	-1	600	0	3	1	1	0	0	1	0	1	0	1
187	0	1	0	1	0	1	0	-1	-1	-1	-1	-1	1200	0	3	1	1	0	0	1	0	1	0	1
187	0	0	1	-1	-1	1	0	-1	-1	1	0	0	1800	1	3	1	1	0	0	1	0	1	0	1
187	1	-1	-1	-1	-1	-1	-1	-1	-1	-1	-1	-1	600	0	3	1	1	0	0	1	0	1	0	1
187	0	0	1	-1	-1	1	0	-1	-1	1	0	0	1800	0	3	1	1	0	0	1	0	1	0	1
187	0	1	0	1	0	1	0	0	1	-1	-1	-1	3600	0	3	1	1	0	0	1	0	1	0	1
187	1	-1	-1	-1	-1	-1	-1	-1	-1	-1	-1	-1	600	1	3	1	1	0	0	1	0	1	0	1
188	0	-1	-1	0	1	-1	-1	-1	-1	0	0	1	3600	1	3	1	0	0	0	1	0	1	0	1
188	0	1	0	-1	-1	-1	-1	1	0	0	0	1	1200	0	3	1	0	0	0	1	0	1	0	1
188	1	-1	-1	-1	-1	-1	-1	-1	-1	-1	-1	-1	600	0	3	1	0	0	0	1	0	1	0	1
188	0	1	0	1	0	1	0	-1	-1	-1	-1	-1	1200	0	3	1	0	0	0	1	0	1	0	1
188	0	-1	-1	1	0	0	1	0	1	0	0	1	1800	1	3	1	0	0	0	1	0	1	0	1
188	1	-1	-1	-1	-1	-1	-1	-1	-1	-1	-1	-1	600	0	3	1	0	0	0	1	0	1	0	1
188	0	0	1	-1	-1	1	0	-1	-1	1	0	0	1800	0	3	1	0	0	0	1	0	1	0	1
188	0	1	0	1	0	-1	-1	1	0	-1	-1	-1	1800	1	3	1	0	0	0	1	0	1	0	1
188	1	-1	-1	-1	-1	-1	-1	-1	-1	-1	-1	-1	600	0	3	1	0	0	0	1	0	1	0	1
189	0	-1	-1	0	1	-1	-1	-1	-1	0	0	1	3600	0	3	1	1	1	0	1	0	1	0	1
189	0	-1	-1	1	0	1	0	1	0	0	1	0	600	1	3	1	1	1	0	1	0	1	0	1
189	1	-1	-1	-1	-1	-1	-1	-1	-1	-1	-1	-1	600	0	3	1	1	1	0	1	0	1	0	1
189	0	1	0	1	0	1	0	-1	-1	-1	-1	-1	1200	0	3	1	1	1	0	1	0	1	0	1
189	0	1	0	1	0	-1	-1	1	0	1	0	0	2400	1	3	1	1	1	0	1	0	1	0	1
189	1	-1	-1	-1	-1	-1	-1	-1	-1	-1	-1	-1	600	0	3	1	1	1	0	1	0	1	0	1
189	0	0	1	-1	-1	1	0	-1	-1	1	0	0	1800	0	3	1	1	1	0	1	0	1	0	1
189	0	-1	-1	0	1	1	0	1	0	-1	-1	-1	1200	1	3	1	1	1	0	1	0	1	0	1
189	1	-1	-1	-1	-1	-1	-1	-1	-1	-1	-1	-1	600	0	3	1	1	1	0	1	0	1	0	1
190	0	-1	-1	0	1	-1	-1	-1	-1	0	0	1	3600	0	3	1	1	0	1	1	0	1	0	1
190	0	1	0	-1	-1	0	1	-1	-1	-1	-1	-1	600	1	3	1	1	0	1	1	0	1	0	1
190	1	-1	-1	-1	-1	-1	-1	-1	-1	-1	-1	-1	600	0	3	1	1	0	1	1	0	1	0	1
190	0	1	0	1	0	1	0	-1	-1	-1	-1	-1	1200	1	3	1	1	0	1	1	0	1	0	1
190	0	0	1	-1	-1	-1	-1	0	1	0	1	0	1200	0	3	1	1	0	1	1	0	1	0	1
190	1	-1	-1	-1	-1	-1	-1	-1	-1	-1	-1	-1	600	0	3	1	1	0	1	1	0	1	0	1
190	0	0	1	-1	-1	1	0	-1	-1	1	0	0	1800	0	3	1	1	0	1	1	0	1	0	1
190	0	0	1	1	0	1	0	1	0	0	0	1	600	1	3	1	1	0	1	1	0	1	0	1
190	1	-1	-1	-1	-1	-1	-1	-1	-1	-1	-1	-1	600	0	3	1	1	0	1	1	0	1	0	1
191	0	-1	-1	0	1	-1	-1	-1	-1	0	0	1	3600	0	3	1	0	1	1	1	0	1	0	1
191	0	-1	-1	-1	-1	-1	-1	1	0	-1	-1	-1	1800	0	3	1	0	1	1	1	0	1	0	1
191	1	-1	-1	-1	-1	-1	-1	-1	-1	-1	-1	-1	600	1	3	1	0	1	1	1	0	1	0	1
191	0	1	0	1	0	1	0	-1	-1	-1	-1	-1	1200	0	3	1	0	1	1	1	0	1	0	1
191	0	0	1	1	0	-1	-1	-1	-1	-1	-1	-1	3600	0	3	1	0	1	1	1	0	1	0	1
191	1	-1	-1	-1	-1	-1	-1	-1	-1	-1	-1	-1	600	1	3	1	0	1	1	1	0	1	0	1
191	0	0	1	-1	-1	1	0	-1	-1	1	0	0	1800	0	3	1	0	1	1	1	0	1	0	1
191	0	1	0	-1	-1	-1	-1	1	0	0	0	1	1200	0	3	1	0	1	1	1	0	1	0	1
191	1	-1	-1	-1	-1	-1	-1	-1	-1	-1	-1	-1	600	1	3	1	0	1	1	1	0	1	0	1
192	0	-1	-1	1	0	-1	-1	-1	-1	0	1	0	2400	0	3	1	1	1	0	1	0	0	0	1
192	0	0	1	0	1	0	1	1	0	-1	-1	-1	2400	1	3	1	1	1	0	1	0	0	0	1
192	1	-1	-1	-1	-1	-1	-1	-1	-1	-1	-1	-1	600	0	3	1	1	1	0	1	0	0	0	1
192	0	1	0	1	0	1	0	-1	-1	-1	-1	-1	1200	1	3	1	1	1	0	1	0	0	0	1
192	0	1	0	1	0	1	0	0	1	-1	-1	-1	3600	0	3	1	1	1	0	1	0	0	0	1
192	1	-1	-1	-1	-1	-1	-1	-1	-1	-1	-1	-1	600	0	3	1	1	1	0	1	0	0	0	1
192	0	0	1	-1	-1	1	0	-1	-1	1	0	0	1800	0	3	1	1	1	0	1	0	0	0	1
192	0	-1	-1	1	0	1	0	1	0	0	1	0	600	1	3	1	1	1	0	1	0	0	0	1
192	1	-1	-1	-1	-1	-1	-1	-1	-1	-1	-1	-1	600	0	3	1	1	1	0	1	0	0	0	1
193	0	-1	-1	1	0	-1	-1	-1	-1	0	1	0	2400	0	3	1	0	1	0	1	0	0	0	1
193	0	-1	-1	1	0	0	1	-1	-1	1	0	0	1200	1	3	1	0	1	0	1	0	0	0	1
193	1	-1	-1	-1	-1	-1	-1	-1	-1	-1	-1	-1	600	0	3	1	0	1	0	1	0	0	0	1
193	0	1	0	1	0	1	0	-1	-1	-1	-1	-1	1200	0	3	1	0	1	0	1	0	0	0	1
193	0	1	0	1	0	-1	-1	1	0	-1	-1	-1	1800	1	3	1	0	1	0	1	0	0	0	1
193	1	-1	-1	-1	-1	-1	-1	-1	-1	-1	-1	-1	600	0	3	1	0	1	0	1	0	0	0	1
193	0	0	1	-1	-1	1	0	-1	-1	1	0	0	1800	0	3	1	0	1	0	1	0	0	0	1
193	0	1	0	-1	-1	0	1	-1	-1	-1	-1	-1	600	1	3	1	0	1	0	1	0	0	0	1
193	1	-1	-1	-1	-1	-1	-1	-1	-1	-1	-1	-1	600	0	3	1	0	1	0	1	0	0	0	1
194	0	-1	-1	1	0	-1	-1	-1	-1	0	1	0	2400	0	3	1	1	1	1	1	1	0	0	1
194	0	-1	-1	-1	-1	1	0	1	0	1	0	0	3600	1	3	1	1	1	1	1	1	0	0	1
194	1	-1	-1	-1	-1	-1	-1	-1	-1	-1	-1	-1	600	0	3	1	1	1	1	1	1	0	0	1
194	0	1	0	1	0	1	0	-1	-1	-1	-1	-1	1200	1	3	1	1	1	1	1	1	0	0	1
194	0	-1	-1	0	1	1	0	1	0	-1	-1	-1	1200	0	3	1	1	1	1	1	1	0	0	1
194	1	-1	-1	-1	-1	-1	-1	-1	-1	-1	-1	-1	600	0	3	1	1	1	1	1	1	0	0	1
194	0	0	1	-1	-1	1	0	-1	-1	1	0	0	1800	1	3	1	1	1	1	1	1	0	0	1
194	0	-1	-1	-1	-1	-1	-1	1	0	-1	-1	-1	1800	0	3	1	1	1	1	1	1	0	0	1
194	1	-1	-1	-1	-1	-1	-1	-1	-1	-1	-1	-1	600	0	3	1	1	1	1	1	1	0	0	1
195	0	-1	-1	1	0	-1	-1	-1	-1	0	1	0	2400	0	3	1	1	1	1	1	0	0	0	1
195	0	1	0	1	0	1	0	-1	-1	-1	-1	-1	1200	0	3	1	1	1	1	1	0	0	0	1
195	1	-1	-1	-1	-1	-1	-1	-1	-1	-1	-1	-1	600	1	3	1	1	1	1	1	0	0	0	1
195	0	1	0	1	0	1	0	-1	-1	-1	-1	-1	1200	0	3	1	1	1	1	1	0	0	0	1
195	0	0	1	1	0	1	0	1	0	0	0	1	600	1	3	1	1	1	1	1	0	0	0	1
195	1	-1	-1	-1	-1	-1	-1	-1	-1	-1	-1	-1	600	0	3	1	1	1	1	1	0	0	0	1
195	0	-1	-1	1	0	0	1	0	1	0	0	1	1800	0	3	1	1	1	1	1	0	0	0	1
195	0	1	0	1	0	-1	-1	1	0	1	0	0	2400	1	3	1	1	1	1	1	0	0	0	1
195	1	-1	-1	-1	-1	-1	-1	-1	-1	-1	-1	-1	600	0	3	1	1	1	1	1	0	0	0	1
196	0	-1	-1	1	0	-1	-1	-1	-1	0	1	0	2400	0	3	1	0	1	0	1	0	1	0	1
196	0	-1	-1	-1	-1	1	0	0	1	-1	-1	-1	2400	1	3	1	0	1	0	1	0	1	0	1
196	1	-1	-1	-1	-1	-1	-1	-1	-1	-1	-1	-1	600	0	3	1	0	1	0	1	0	1	0	1
196	0	1	0	1	0	1	0	-1	-1	-1	-1	-1	1200	1	3	1	0	1	0	1	0	1	0	1
196	0	1	0	-1	-1	-1	-1	1	0	0	0	1	1200	0	3	1	0	1	0	1	0	1	0	1
196	1	-1	-1	-1	-1	-1	-1	-1	-1	-1	-1	-1	600	0	3	1	0	1	0	1	0	1	0	1
196	0	-1	-1	1	0	0	1	0	1	0	0	1	1800	1	3	1	0	1	0	1	0	1	0	1
196	0	0	1	-1	-1	-1	-1	0	1	0	1	0	1200	0	3	1	0	1	0	1	0	1	0	1
196	1	-1	-1	-1	-1	-1	-1	-1	-1	-1	-1	-1	600	0	3	1	0	1	0	1	0	1	0	1
197	0	-1	-1	1	0	-1	-1	-1	-1	0	1	0	2400	1	3	1	1	1	0	1	0	0	0	1
197	0	1	0	0	1	1	0	-1	-1	0	1	0	1800	0	3	1	1	1	0	1	0	0	0	1
197	1	-1	-1	-1	-1	-1	-1	-1	-1	-1	-1	-1	600	0	3	1	1	1	0	1	0	0	0	1
197	0	1	0	1	0	1	0	-1	-1	-1	-1	-1	1200	0	3	1	1	1	0	1	0	0	0	1
197	0	-1	-1	1	0	1	0	1	0	0	1	0	600	0	3	1	1	1	0	1	0	0	0	1
197	1	-1	-1	-1	-1	-1	-1	-1	-1	-1	-1	-1	600	1	3	1	1	1	0	1	0	0	0	1
197	0	-1	-1	1	0	0	1	0	1	0	0	1	1800	0	3	1	1	1	0	1	0	0	0	1
197	0	0	1	1	0	-1	-1	-1	-1	-1	-1	-1	3600	1	3	1	1	1	0	1	0	0	0	1
197	1	-1	-1	-1	-1	-1	-1	-1	-1	-1	-1	-1	600	0	3	1	1	1	0	1	0	0	0	1
198	0	-1	-1	1	0	-1	-1	-1	-1	0	1	0	2400	1	3	1	1	1	1	1	0	0	0	1
198	0	1	0	-1	-1	1	0	-1	-1	0	0	1	2400	0	3	1	1	1	1	1	0	0	0	1
198	1	-1	-1	-1	-1	-1	-1	-1	-1	-1	-1	-1	600	0	3	1	1	1	1	1	0	0	0	1
198	0	1	0	1	0	1	0	-1	-1	-1	-1	-1	1200	1	3	1	1	1	1	1	0	0	0	1
198	0	1	0	-1	-1	0	1	-1	-1	-1	-1	-1	600	0	3	1	1	1	1	1	0	0	0	1
198	1	-1	-1	-1	-1	-1	-1	-1	-1	-1	-1	-1	600	0	3	1	1	1	1	1	0	0	0	1
198	0	-1	-1	1	0	0	1	0	1	0	0	1	1800	0	3	1	1	1	1	1	0	0	0	1
198	0	1	0	1	0	1	0	0	1	-1	-1	-1	3600	1	3	1	1	1	1	1	0	0	0	1
198	1	-1	-1	-1	-1	-1	-1	-1	-1	-1	-1	-1	600	0	3	1	1	1	1	1	0	0	0	1
199	0	-1	-1	1	0	-1	-1	-1	-1	0	1	0	2400	1	3	1	0	0	0	0	0	1	0	1
199	0	1	0	-1	-1	0	1	1	0	0	1	0	3600	0	3	1	0	0	0	0	0	1	0	1
199	1	-1	-1	-1	-1	-1	-1	-1	-1	-1	-1	-1	600	0	3	1	0	0	0	0	0	1	0	1
199	0	1	0	1	0	1	0	-1	-1	-1	-1	-1	1200	1	3	1	0	0	0	0	0	1	0	1
199	0	-1	-1	-1	-1	-1	-1	1	0	-1	-1	-1	1800	0	3	1	0	0	0	0	0	1	0	1
199	1	-1	-1	-1	-1	-1	-1	-1	-1	-1	-1	-1	600	0	3	1	0	0	0	0	0	1	0	1
199	0	-1	-1	1	0	0	1	0	1	0	0	1	1800	1	3	1	0	0	0	0	0	1	0	1
199	0	1	0	1	0	-1	-1	1	0	-1	-1	-1	1800	0	3	1	0	0	0	0	0	1	0	1
199	1	-1	-1	-1	-1	-1	-1	-1	-1	-1	-1	-1	600	0	3	1	0	0	0	0	0	1	0	1
200	0	-1	-1	1	0	-1	-1	-1	-1	0	1	0	2400	0	3	1	0	1	0	1	0	0	0	1
200	0	1	0	0	1	-1	-1	0	1	1	0	0	600	0	3	1	0	1	0	1	0	0	0	1
200	1	-1	-1	-1	-1	-1	-1	-1	-1	-1	-1	-1	600	1	3	1	0	1	0	1	0	0	0	1
200	0	-1	-1	-1	-1	1	0	0	1	-1	-1	-1	2400	1	3	1	0	1	0	1	0	0	0	1
200	0	1	0	0	1	1	0	-1	-1	0	1	0	1800	0	3	1	0	1	0	1	0	0	0	1
200	1	-1	-1	-1	-1	-1	-1	-1	-1	-1	-1	-1	600	0	3	1	0	1	0	1	0	0	0	1
200	0	-1	-1	1	0	0	1	0	1	0	0	1	1800	1	3	1	0	1	0	1	0	0	0	1
200	0	-1	-1	0	1	1	0	1	0	-1	-1	-1	1200	0	3	1	0	1	0	1	0	0	0	1
200	1	-1	-1	-1	-1	-1	-1	-1	-1	-1	-1	-1	600	0	3	1	0	1	0	1	0	0	0	1
201	0	-1	-1	1	0	-1	-1	-1	-1	0	1	0	2400	0	3	1	0	1	1	1	0	0	0	1
201	0	0	1	-1	-1	1	0	-1	-1	1	0	0	1800	1	3	1	0	1	1	1	0	0	0	1
201	1	-1	-1	-1	-1	-1	-1	-1	-1	-1	-1	-1	600	0	3	1	0	1	1	1	0	0	0	1
201	0	-1	-1	-1	-1	1	0	0	1	-1	-1	-1	2400	0	3	1	0	1	1	1	0	0	0	1
201	0	1	0	-1	-1	1	0	-1	-1	0	0	1	2400	1	3	1	0	1	1	1	0	0	0	1
201	1	-1	-1	-1	-1	-1	-1	-1	-1	-1	-1	-1	600	0	3	1	0	1	1	1	0	0	0	1
201	0	-1	-1	1	0	0	1	0	1	0	0	1	1800	0	3	1	0	1	1	1	0	0	0	1
201	0	0	1	1	0	1	0	1	0	0	0	1	600	1	3	1	0	1	1	1	0	0	0	1
201	1	-1	-1	-1	-1	-1	-1	-1	-1	-1	-1	-1	600	0	3	1	0	1	1	1	0	0	0	1
202	0	-1	-1	1	0	-1	-1	-1	-1	0	1	0	2400	0	3	0	1	1	1	1	1	0	0	1
202	0	-1	-1	1	0	0	1	0	1	0	0	1	1800	1	3	0	1	1	1	1	1	0	0	1
202	1	-1	-1	-1	-1	-1	-1	-1	-1	-1	-1	-1	600	0	3	0	1	1	1	1	1	0	0	1
202	0	-1	-1	-1	-1	1	0	0	1	-1	-1	-1	2400	0	3	0	1	1	1	1	1	0	0	1
202	0	1	0	-1	-1	0	1	1	0	0	1	0	3600	1	3	0	1	1	1	1	1	0	0	1
202	1	-1	-1	-1	-1	-1	-1	-1	-1	-1	-1	-1	600	0	3	0	1	1	1	1	1	0	0	1
202	0	-1	-1	1	0	0	1	0	1	0	0	1	1800	1	3	0	1	1	1	1	1	0	0	1
202	0	1	0	-1	-1	-1	-1	1	0	0	0	1	1200	0	3	0	1	1	1	1	1	0	0	1
202	1	-1	-1	-1	-1	-1	-1	-1	-1	-1	-1	-1	600	0	3	0	1	1	1	1	1	0	0	1
203	0	-1	-1	1	0	-1	-1	-1	-1	0	1	0	2400	1	3	1	1	1	0	1	0	1	0	0
203	0	1	0	1	0	-1	-1	1	0	1	0	0	2400	0	3	1	1	1	0	1	0	1	0	0
203	1	-1	-1	-1	-1	-1	-1	-1	-1	-1	-1	-1	600	0	3	1	1	1	0	1	0	1	0	0
203	0	-1	-1	-1	-1	1	0	0	1	-1	-1	-1	2400	1	3	1	1	1	0	1	0	1	0	0
203	0	1	0	0	1	-1	-1	0	1	1	0	0	600	0	3	1	1	1	0	1	0	1	0	0
203	1	-1	-1	-1	-1	-1	-1	-1	-1	-1	-1	-1	600	0	3	1	1	1	0	1	0	1	0	0
203	0	-1	-1	1	0	0	1	0	1	0	0	1	1800	0	3	1	1	1	0	1	0	1	0	0
203	0	-1	-1	1	0	1	0	1	0	0	1	0	600	1	3	1	1	1	0	1	0	1	0	0
203	1	-1	-1	-1	-1	-1	-1	-1	-1	-1	-1	-1	600	0	3	1	1	1	0	1	0	1	0	0
204	0	-1	-1	1	0	-1	-1	-1	-1	0	1	0	2400	0	3	1	1	0	1	1	0	0	0	1
204	0	0	1	-1	-1	-1	-1	0	1	0	1	0	1200	0	3	1	1	0	1	1	0	0	0	1
204	1	-1	-1	-1	-1	-1	-1	-1	-1	-1	-1	-1	600	1	3	1	1	0	1	1	0	0	0	1
204	0	-1	-1	-1	-1	1	0	0	1	-1	-1	-1	2400	0	3	1	1	0	1	1	0	0	0	1
204	0	0	1	-1	-1	1	0	-1	-1	1	0	0	1800	1	3	1	1	0	1	1	0	0	0	1
204	1	-1	-1	-1	-1	-1	-1	-1	-1	-1	-1	-1	600	0	3	1	1	0	1	1	0	0	0	1
204	0	-1	-1	1	0	0	1	0	1	0	0	1	1800	1	3	1	1	0	1	1	0	0	0	1
204	0	1	0	-1	-1	0	1	-1	-1	-1	-1	-1	600	0	3	1	1	0	1	1	0	0	0	1
204	1	-1	-1	-1	-1	-1	-1	-1	-1	-1	-1	-1	600	0	3	1	1	0	1	1	0	0	0	1
205	0	-1	-1	1	0	-1	-1	-1	-1	0	1	0	2400	0	3	0	0	1	0	1	0	0	0	1
205	0	0	1	1	0	-1	-1	-1	-1	-1	-1	-1	3600	1	3	0	0	1	0	1	0	0	0	1
205	1	-1	-1	-1	-1	-1	-1	-1	-1	-1	-1	-1	600	0	3	0	0	1	0	1	0	0	0	1
205	0	-1	-1	-1	-1	1	0	0	1	-1	-1	-1	2400	1	3	0	0	1	0	1	0	0	0	1
205	0	-1	-1	1	0	0	1	0	1	0	0	1	1800	0	3	0	0	1	0	1	0	0	0	1
205	1	-1	-1	-1	-1	-1	-1	-1	-1	-1	-1	-1	600	0	3	0	0	1	0	1	0	0	0	1
205	0	-1	-1	1	0	0	1	0	1	0	0	1	1800	1	3	0	0	1	0	1	0	0	0	1
205	0	-1	-1	-1	-1	-1	-1	1	0	-1	-1	-1	1800	0	3	0	0	1	0	1	0	0	0	1
205	1	-1	-1	-1	-1	-1	-1	-1	-1	-1	-1	-1	600	0	3	0	0	1	0	1	0	0	0	1
206	0	-1	-1	1	0	-1	-1	-1	-1	0	1	0	2400	0	3	1	1	1	0	1	0	0	0	1
206	0	1	0	1	0	1	0	0	1	-1	-1	-1	3600	0	3	1	1	1	0	1	0	0	0	1
206	1	-1	-1	-1	-1	-1	-1	-1	-1	-1	-1	-1	600	1	3	1	1	1	0	1	0	0	0	1
206	0	-1	-1	-1	-1	1	0	0	1	-1	-1	-1	2400	1	3	1	1	1	0	1	0	0	0	1
206	0	1	0	1	0	-1	-1	1	0	1	0	0	2400	0	3	1	1	1	0	1	0	0	0	1
206	1	-1	-1	-1	-1	-1	-1	-1	-1	-1	-1	-1	600	0	3	1	1	1	0	1	0	0	0	1
206	0	1	0	1	0	-1	-1	1	0	1	0	0	2400	1	3	1	1	1	0	1	0	0	0	1
206	0	0	1	-1	-1	-1	-1	0	1	0	1	0	1200	0	3	1	1	1	0	1	0	0	0	1
206	1	-1	-1	-1	-1	-1	-1	-1	-1	-1	-1	-1	600	0	3	1	1	1	0	1	0	0	0	1
207	0	-1	-1	1	0	-1	-1	-1	-1	0	1	0	2400	0	3	1	1	1	0	1	0	0	0	1
207	0	1	0	1	0	-1	-1	1	0	-1	-1	-1	1800	1	3	1	1	1	0	1	0	0	0	1
207	1	-1	-1	-1	-1	-1	-1	-1	-1	-1	-1	-1	600	0	3	1	1	1	0	1	0	0	0	1
207	0	-1	-1	-1	-1	1	0	0	1	-1	-1	-1	2400	0	3	1	1	1	0	1	0	0	0	1
207	0	0	1	-1	-1	-1	-1	0	1	0	1	0	1200	1	3	1	1	1	0	1	0	0	0	1
207	1	-1	-1	-1	-1	-1	-1	-1	-1	-1	-1	-1	600	0	3	1	1	1	0	1	0	0	0	1
207	0	1	0	1	0	-1	-1	1	0	1	0	0	2400	0	3	1	1	1	0	1	0	0	0	1
207	0	0	1	1	0	-1	-1	-1	-1	-1	-1	-1	3600	1	3	1	1	1	0	1	0	0	0	1
207	1	-1	-1	-1	-1	-1	-1	-1	-1	-1	-1	-1	600	0	3	1	1	1	0	1	0	0	0	1
208	0	-1	-1	1	0	-1	-1	-1	-1	0	1	0	2400	0	3	1	1	1	1	1	1	0	0	1
208	0	-1	-1	0	1	1	0	1	0	-1	-1	-1	1200	0	3	1	1	1	1	1	1	0	0	1
208	1	-1	-1	-1	-1	-1	-1	-1	-1	-1	-1	-1	600	1	3	1	1	1	1	1	1	0	0	1
208	0	-1	-1	-1	-1	1	0	0	1	-1	-1	-1	2400	0	3	1	1	1	1	1	1	0	0	1
208	0	0	1	1	0	-1	-1	-1	-1	-1	-1	-1	3600	1	3	1	1	1	1	1	1	0	0	1
208	1	-1	-1	-1	-1	-1	-1	-1	-1	-1	-1	-1	600	0	3	1	1	1	1	1	1	0	0	1
208	0	1	0	1	0	-1	-1	1	0	1	0	0	2400	0	3	1	1	1	1	1	1	0	0	1
208	0	1	0	1	0	1	0	0	1	-1	-1	-1	3600	1	3	1	1	1	1	1	1	0	0	1
208	1	-1	-1	-1	-1	-1	-1	-1	-1	-1	-1	-1	600	0	3	1	1	1	1	1	1	0	0	1
209	0	-1	-1	1	0	-1	-1	-1	-1	0	1	0	2400	0	3	1	1	1	0	0	0	1	0	1
209	0	0	1	1	0	1	0	1	0	0	0	1	600	1	3	1	1	1	0	0	0	1	0	1
209	1	-1	-1	-1	-1	-1	-1	-1	-1	-1	-1	-1	600	0	3	1	1	1	0	0	0	1	0	1
209	0	-1	-1	-1	-1	1	0	0	1	-1	-1	-1	2400	0	3	1	1	1	0	0	0	1	0	1
209	0	1	0	1	0	1	0	0	1	-1	-1	-1	3600	1	3	1	1	1	0	0	0	1	0	1
209	1	-1	-1	-1	-1	-1	-1	-1	-1	-1	-1	-1	600	0	3	1	1	1	0	0	0	1	0	1
209	0	1	0	1	0	-1	-1	1	0	1	0	0	2400	0	3	1	1	1	0	0	0	1	0	1
209	0	1	0	1	0	-1	-1	1	0	-1	-1	-1	1800	1	3	1	1	1	0	0	0	1	0	1
209	1	-1	-1	-1	-1	-1	-1	-1	-1	-1	-1	-1	600	0	3	1	1	1	0	0	0	1	0	1
210	0	-1	-1	1	0	-1	-1	-1	-1	0	1	0	2400	1	3	1	1	1	1	1	0	1	0	1
210	0	1	0	-1	-1	-1	-1	1	0	0	0	1	1200	0	3	1	1	1	1	1	0	1	0	1
210	1	-1	-1	-1	-1	-1	-1	-1	-1	-1	-1	-1	600	0	3	1	1	1	1	1	0	1	0	1
210	0	-1	-1	-1	-1	1	0	0	1	-1	-1	-1	2400	0	3	1	1	1	1	1	0	1	0	1
210	0	1	0	1	0	-1	-1	1	0	-1	-1	-1	1800	0	3	1	1	1	1	1	0	1	0	1
210	1	-1	-1	-1	-1	-1	-1	-1	-1	-1	-1	-1	600	1	3	1	1	1	1	1	0	1	0	1
210	0	1	0	1	0	-1	-1	1	0	1	0	0	2400	0	3	1	1	1	1	1	0	1	0	1
210	0	-1	-1	0	1	1	0	1	0	-1	-1	-1	1200	1	3	1	1	1	1	1	0	1	0	1
210	1	-1	-1	-1	-1	-1	-1	-1	-1	-1	-1	-1	600	0	3	1	1	1	1	1	0	1	0	1
211	0	-1	-1	1	0	-1	-1	-1	-1	0	1	0	2400	0	3	1	0	1	0	0	0	1	0	1
211	0	-1	-1	1	0	1	0	1	0	0	1	0	600	0	3	1	0	1	0	0	0	1	0	1
211	1	-1	-1	-1	-1	-1	-1	-1	-1	-1	-1	-1	600	1	3	1	0	1	0	0	0	1	0	1
211	0	-1	-1	-1	-1	1	0	0	1	-1	-1	-1	2400	0	3	1	0	1	0	0	0	1	0	1
211	0	-1	-1	0	1	1	0	1	0	-1	-1	-1	1200	1	3	1	0	1	0	0	0	1	0	1
211	1	-1	-1	-1	-1	-1	-1	-1	-1	-1	-1	-1	600	0	3	1	0	1	0	0	0	1	0	1
211	0	1	0	1	0	-1	-1	1	0	1	0	0	2400	0	3	1	0	1	0	0	0	1	0	1
211	0	0	1	1	0	1	0	1	0	0	0	1	600	1	3	1	0	1	0	0	0	1	0	1
211	1	-1	-1	-1	-1	-1	-1	-1	-1	-1	-1	-1	600	0	3	1	0	1	0	0	0	1	0	1
212	0	-1	-1	1	0	-1	-1	-1	-1	0	1	0	2400	1	3	1	1	0	0	1	0	1	0	1
212	0	1	0	-1	-1	0	1	-1	-1	-1	-1	-1	600	0	3	1	1	0	0	1	0	1	0	1
212	1	-1	-1	-1	-1	-1	-1	-1	-1	-1	-1	-1	600	0	3	1	1	0	0	1	0	1	0	1
212	0	-1	-1	-1	-1	1	0	0	1	-1	-1	-1	2400	0	3	1	1	0	0	1	0	1	0	1
212	0	0	1	1	0	1	0	1	0	0	0	1	600	1	3	1	1	0	0	1	0	1	0	1
212	1	-1	-1	-1	-1	-1	-1	-1	-1	-1	-1	-1	600	0	3	1	1	0	0	1	0	1	0	1
212	0	1	0	1	0	-1	-1	1	0	1	0	0	2400	0	3	1	1	0	0	1	0	1	0	1
212	0	1	0	-1	-1	-1	-1	1	0	0	0	1	1200	1	3	1	1	0	0	1	0	1	0	1
212	1	-1	-1	-1	-1	-1	-1	-1	-1	-1	-1	-1	600	0	3	1	1	0	0	1	0	1	0	1
213	0	-1	-1	1	0	-1	-1	-1	-1	0	1	0	2400	1	3	1	0	1	1	1	0	1	0	1
213	0	-1	-1	-1	-1	-1	-1	1	0	-1	-1	-1	1800	0	3	1	0	1	1	1	0	1	0	1
213	1	-1	-1	-1	-1	-1	-1	-1	-1	-1	-1	-1	600	0	3	1	0	1	1	1	0	1	0	1
213	0	-1	-1	-1	-1	1	0	0	1	-1	-1	-1	2400	0	3	1	0	1	1	1	0	1	0	1
213	0	1	0	-1	-1	-1	-1	1	0	0	0	1	1200	1	3	1	0	1	1	1	0	1	0	1
213	1	-1	-1	-1	-1	-1	-1	-1	-1	-1	-1	-1	600	0	3	1	0	1	1	1	0	1	0	1
213	0	1	0	1	0	-1	-1	1	0	1	0	0	2400	0	3	1	0	1	1	1	0	1	0	1
213	0	-1	-1	1	0	1	0	1	0	0	1	0	600	0	3	1	0	1	1	1	0	1	0	1
213	1	-1	-1	-1	-1	-1	-1	-1	-1	-1	-1	-1	600	1	3	1	0	1	1	1	0	1	0	1
214	0	0	1	0	1	0	1	1	0	-1	-1	-1	2400	0	3	1	0	0	1	1	0	1	0	0
214	0	-1	-1	1	0	0	1	-1	-1	1	0	0	1200	1	3	1	0	0	1	1	0	1	0	0
214	1	-1	-1	-1	-1	-1	-1	-1	-1	-1	-1	-1	600	0	3	1	0	0	1	1	0	1	0	0
214	0	-1	-1	-1	-1	1	0	0	1	-1	-1	-1	2400	0	3	1	0	0	1	1	0	1	0	0
214	0	-1	-1	1	0	1	0	1	0	0	1	0	600	1	3	1	0	0	1	1	0	1	0	0
214	1	-1	-1	-1	-1	-1	-1	-1	-1	-1	-1	-1	600	0	3	1	0	0	1	1	0	1	0	0
214	0	1	0	1	0	-1	-1	1	0	1	0	0	2400	0	3	1	0	0	1	1	0	1	0	0
214	0	1	0	-1	-1	0	1	-1	-1	-1	-1	-1	600	1	3	1	0	0	1	1	0	1	0	0
214	1	-1	-1	-1	-1	-1	-1	-1	-1	-1	-1	-1	600	0	3	1	0	0	1	1	0	1	0	0
215	0	0	1	0	1	0	1	1	0	-1	-1	-1	2400	1	3	1	1	1	1	1	0	1	0	1
215	0	-1	-1	-1	-1	1	0	1	0	1	0	0	3600	0	3	1	1	1	1	1	0	1	0	1
215	1	-1	-1	-1	-1	-1	-1	-1	-1	-1	-1	-1	600	0	3	1	1	1	1	1	0	1	0	1
215	0	-1	-1	-1	-1	1	0	0	1	-1	-1	-1	2400	1	3	1	1	1	1	1	0	1	0	1
215	0	1	0	-1	-1	0	1	-1	-1	-1	-1	-1	600	0	3	1	1	1	1	1	0	1	0	1
215	1	-1	-1	-1	-1	-1	-1	-1	-1	-1	-1	-1	600	0	3	1	1	1	1	1	0	1	0	1
215	0	1	0	1	0	-1	-1	1	0	1	0	0	2400	1	3	1	1	1	1	1	0	1	0	1
215	0	-1	-1	-1	-1	-1	-1	1	0	-1	-1	-1	1800	0	3	1	1	1	1	1	0	1	0	1
215	1	-1	-1	-1	-1	-1	-1	-1	-1	-1	-1	-1	600	0	3	1	1	1	1	1	0	1	0	1
216	0	0	1	0	1	0	1	1	0	-1	-1	-1	2400	1	3	1	0	1	1	1	0	1	0	1
216	0	1	0	1	0	1	0	-1	-1	-1	-1	-1	1200	0	3	1	0	1	1	1	0	1	0	1
216	1	-1	-1	-1	-1	-1	-1	-1	-1	-1	-1	-1	600	0	3	1	0	1	1	1	0	1	0	1
216	0	-1	-1	-1	-1	1	0	0	1	-1	-1	-1	2400	1	3	1	0	1	1	1	0	1	0	1
216	0	-1	-1	-1	-1	-1	-1	1	0	-1	-1	-1	1800	0	3	1	0	1	1	1	0	1	0	1
216	1	-1	-1	-1	-1	-1	-1	-1	-1	-1	-1	-1	600	0	3	1	0	1	1	1	0	1	0	1
216	0	0	1	-1	-1	-1	-1	0	1	0	1	0	1200	1	3	1	0	1	1	1	0	1	0	1
216	0	0	1	1	0	-1	-1	-1	-1	-1	-1	-1	3600	0	3	1	0	1	1	1	0	1	0	1
216	1	-1	-1	-1	-1	-1	-1	-1	-1	-1	-1	-1	600	0	3	1	0	1	1	1	0	1	0	1
217	0	0	1	0	1	0	1	1	0	-1	-1	-1	2400	0	3	1	1	1	0	1	0	0	0	1
217	0	-1	-1	-1	-1	1	0	0	1	-1	-1	-1	2400	0	3	1	1	1	0	1	0	0	0	1
217	1	-1	-1	-1	-1	-1	-1	-1	-1	-1	-1	-1	600	1	3	1	1	1	0	1	0	0	0	1
217	0	1	0	0	1	1	0	-1	-1	0	1	0	1800	0	3	1	1	1	0	1	0	0	0	1
217	0	1	0	-1	-1	1	0	-1	-1	0	0	1	2400	0	3	1	1	1	0	1	0	0	0	1
217	1	-1	-1	-1	-1	-1	-1	-1	-1	-1	-1	-1	600	1	3	1	1	1	0	1	0	0	0	1
217	0	0	1	-1	-1	-1	-1	0	1	0	1	0	1200	0	3	1	1	1	0	1	0	0	0	1
217	0	1	0	1	0	1	0	0	1	-1	-1	-1	3600	0	3	1	1	1	0	1	0	0	0	1
217	1	-1	-1	-1	-1	-1	-1	-1	-1	-1	-1	-1	600	1	3	1	1	1	0	1	0	0	0	1
218	0	0	1	0	1	0	1	1	0	-1	-1	-1	2400	1	3	1	1	0	0	1	0	1	0	1
218	0	1	0	0	1	1	0	-1	-1	0	1	0	1800	0	3	1	1	0	0	1	0	1	0	1
218	1	-1	-1	-1	-1	-1	-1	-1	-1	-1	-1	-1	600	0	3	1	1	0	0	1	0	1	0	1
218	0	1	0	0	1	1	0	-1	-1	0	1	0	1800	1	3	1	1	0	0	1	0	1	0	1
218	0	1	0	-1	-1	0	1	1	0	0	1	0	3600	0	3	1	1	0	0	1	0	1	0	1
218	1	-1	-1	-1	-1	-1	-1	-1	-1	-1	-1	-1	600	0	3	1	1	0	0	1	0	1	0	1
218	0	0	1	-1	-1	-1	-1	0	1	0	1	0	1200	0	3	1	1	0	0	1	0	1	0	1
218	0	1	0	1	0	-1	-1	1	0	-1	-1	-1	1800	0	3	1	1	0	0	1	0	1	0	1
218	1	-1	-1	-1	-1	-1	-1	-1	-1	-1	-1	-1	600	1	3	1	1	0	0	1	0	1	0	1
219	0	0	1	0	1	0	1	1	0	-1	-1	-1	2400	1	3	1	0	1	1	1	0	0	0	1
219	0	1	0	-1	-1	1	0	-1	-1	0	0	1	2400	0	3	1	0	1	1	1	0	0	0	1
219	1	-1	-1	-1	-1	-1	-1	-1	-1	-1	-1	-1	600	0	3	1	0	1	1	1	0	0	0	1
219	0	1	0	0	1	1	0	-1	-1	0	1	0	1800	1	3	1	0	1	1	1	0	0	0	1
219	0	1	0	0	1	-1	-1	0	1	1	0	0	600	0	3	1	0	1	1	1	0	0	0	1
219	1	-1	-1	-1	-1	-1	-1	-1	-1	-1	-1	-1	600	0	3	1	0	1	1	1	0	0	0	1
219	0	0	1	-1	-1	-1	-1	0	1	0	1	0	1200	0	3	1	0	1	1	1	0	0	0	1
219	0	-1	-1	0	1	1	0	1	0	-1	-1	-1	1200	0	3	1	0	1	1	1	0	0	0	1
219	1	-1	-1	-1	-1	-1	-1	-1	-1	-1	-1	-1	600	1	3	1	0	1	1	1	0	0	0	1
220	0	0	1	0	1	0	1	1	0	-1	-1	-1	2400	0	3	1	1	1	1	1	0	0	0	1
220	0	1	0	-1	-1	0	1	1	0	0	1	0	3600	0	3	1	1	1	1	1	0	0	0	1
220	1	-1	-1	-1	-1	-1	-1	-1	-1	-1	-1	-1	600	1	3	1	1	1	1	1	0	0	0	1
220	0	1	0	0	1	1	0	-1	-1	0	1	0	1800	1	3	1	1	1	1	1	0	0	0	1
220	0	0	1	-1	-1	1	0	-1	-1	1	0	0	1800	0	3	1	1	1	1	1	0	0	0	1
220	1	-1	-1	-1	-1	-1	-1	-1	-1	-1	-1	-1	600	0	3	1	1	1	1	1	0	0	0	1
220	0	0	1	-1	-1	-1	-1	0	1	0	1	0	1200	0	3	1	1	1	1	1	0	0	0	1
220	0	0	1	1	0	1	0	1	0	0	0	1	600	0	3	1	1	1	1	1	0	0	0	1
220	1	-1	-1	-1	-1	-1	-1	-1	-1	-1	-1	-1	600	1	3	1	1	1	1	1	0	0	0	1
221	0	0	1	0	1	0	1	1	0	-1	-1	-1	2400	0	3	1	0	1	0	1	0	0	0	1
221	0	1	0	0	1	-1	-1	0	1	1	0	0	600	1	3	1	0	1	0	1	0	0	0	1
221	1	-1	-1	-1	-1	-1	-1	-1	-1	-1	-1	-1	600	0	3	1	0	1	0	1	0	0	0	1
221	0	1	0	0	1	1	0	-1	-1	0	1	0	1800	1	3	1	0	1	0	1	0	0	0	1
221	0	-1	-1	1	0	0	1	0	1	0	0	1	1800	0	3	1	0	1	0	1	0	0	0	1
221	1	-1	-1	-1	-1	-1	-1	-1	-1	-1	-1	-1	600	0	3	1	0	1	0	1	0	0	0	1
221	0	0	1	-1	-1	-1	-1	0	1	0	1	0	1200	0	3	1	0	1	0	1	0	0	0	1
221	0	1	0	-1	-1	-1	-1	1	0	0	0	1	1200	0	3	1	0	1	0	1	0	0	0	1
221	1	-1	-1	-1	-1	-1	-1	-1	-1	-1	-1	-1	600	1	3	1	0	1	0	1	0	0	0	1
222	0	0	1	0	1	0	1	1	0	-1	-1	-1	2400	0	3	1	1	1	1	1	1	0	0	1
222	0	0	1	-1	-1	1	0	-1	-1	1	0	0	1800	1	3	1	1	1	1	1	1	0	0	1
222	1	-1	-1	-1	-1	-1	-1	-1	-1	-1	-1	-1	600	0	3	1	1	1	1	1	1	0	0	1
222	0	1	0	0	1	1	0	-1	-1	0	1	0	1800	1	3	1	1	1	1	1	1	0	0	1
222	0	1	0	1	0	-1	-1	1	0	1	0	0	2400	0	3	1	1	1	1	1	1	0	0	1
222	1	-1	-1	-1	-1	-1	-1	-1	-1	-1	-1	-1	600	0	3	1	1	1	1	1	1	0	0	1
222	0	0	1	-1	-1	-1	-1	0	1	0	1	0	1200	0	3	1	1	1	1	1	1	0	0	1
222	0	-1	-1	1	0	1	0	1	0	0	1	0	600	1	3	1	1	1	1	1	1	0	0	1
222	1	-1	-1	-1	-1	-1	-1	-1	-1	-1	-1	-1	600	0	3	1	1	1	1	1	1	0	0	1
223	0	0	1	0	1	0	1	1	0	-1	-1	-1	2400	1	3	1	0	1	0	1	0	0	0	1
[truncated: 3,671 more rows]
